# Supplementary material for: Pericyte stem cells induce Ly6G + cell accumulation and immunotherapy resistance in pancreatic cancer
Source: PubMed Central journal article supplement — EMBO Rep. 2023 Feb 21;24(4):e56524. doi: 10.15252/embr.202256524 (PMC10074138; doi:10.15252/embr.202256524), 2023-02-21
Supplement: EMBR-24-e56524-s004.pdf [file EMBR-24-e56524-s004.pdf]

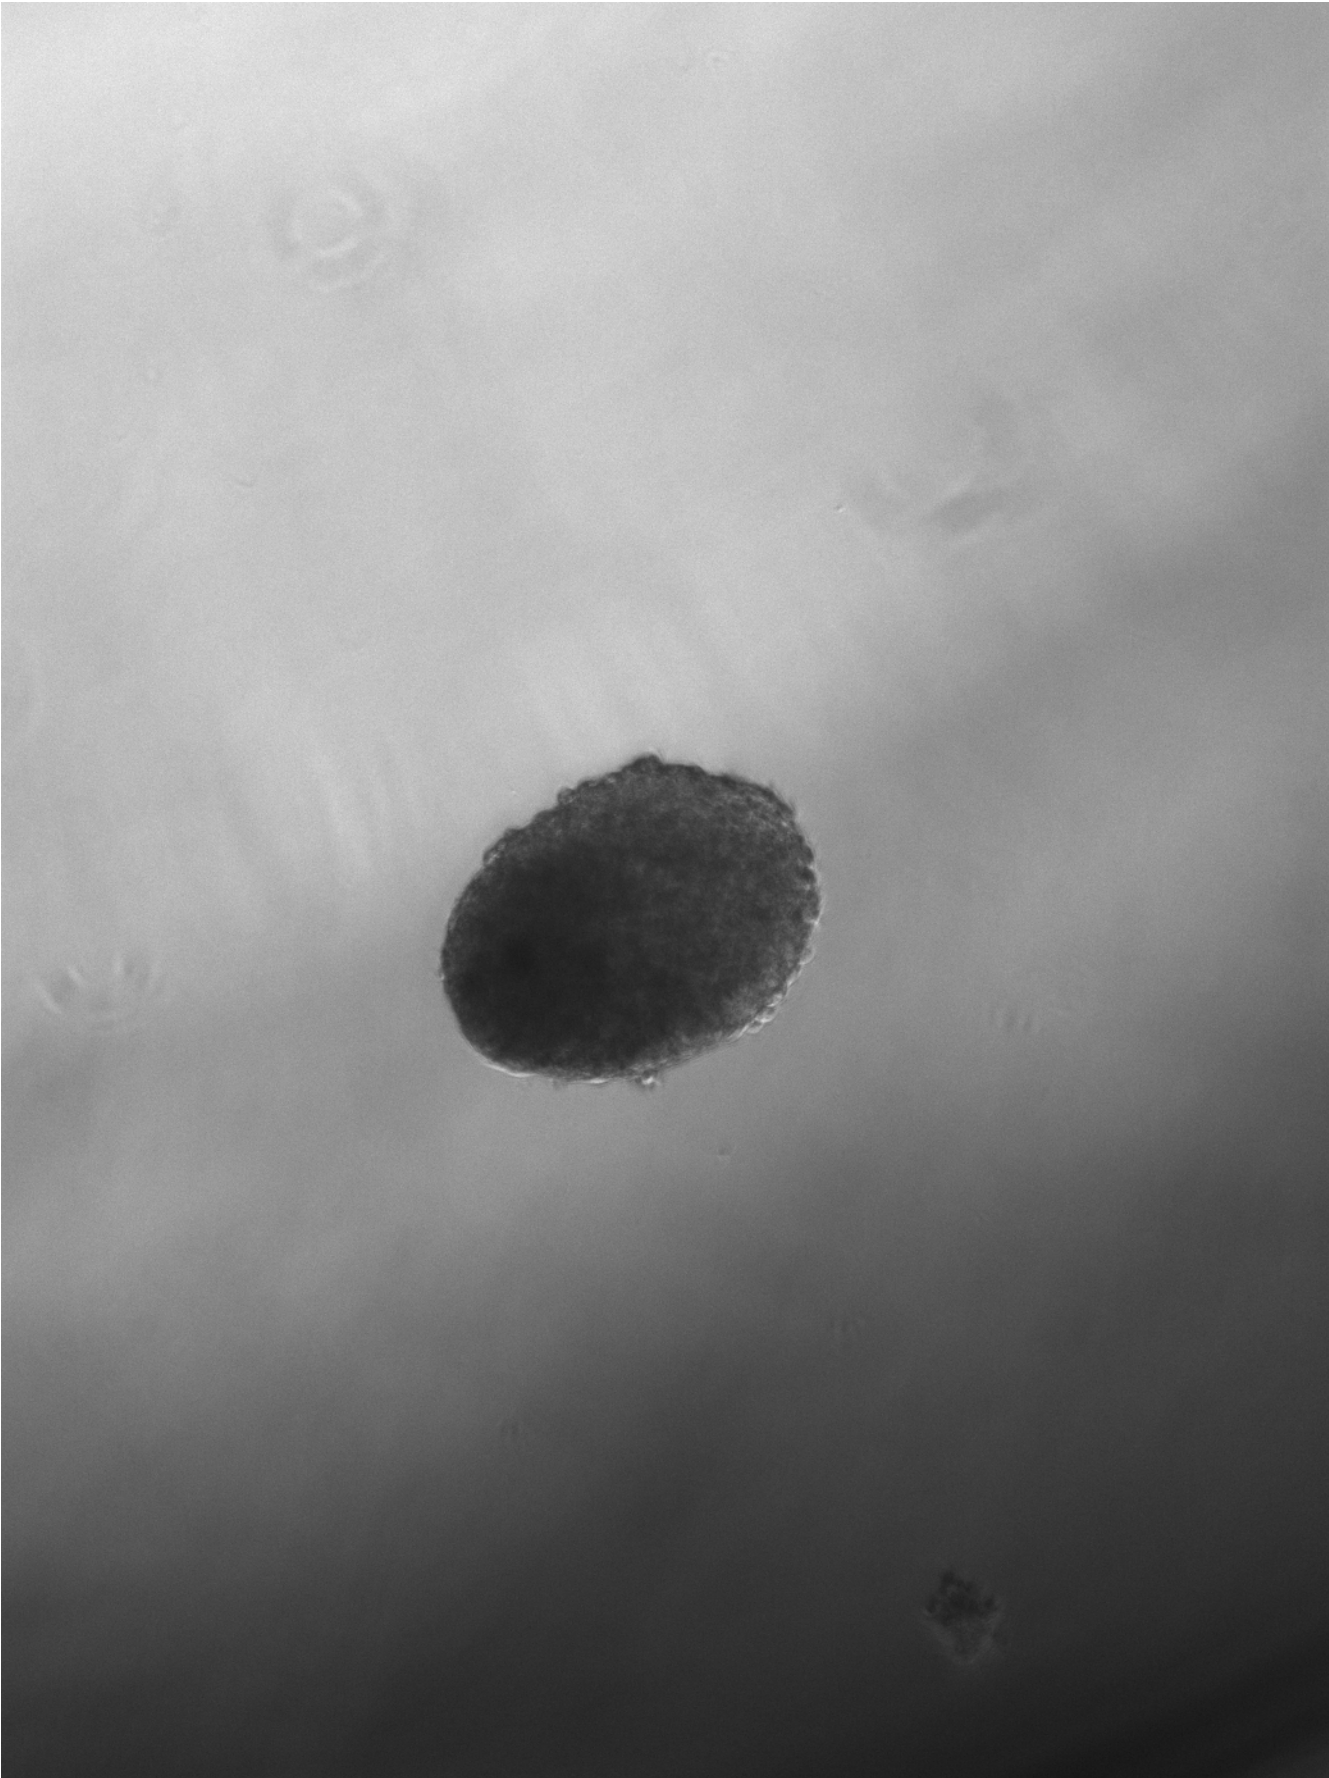

|  | Group A      |
|----------------------------------------------------------------------------------|--------------|
|                                                                                  | day 6 pixels |
|                                                                                  | Y            |
| 1                                                                                | 77032.06     |
| 2                                                                                | 66485.03     |
| 3                                                                                | 37150.67     |
| 4                                                                                | 50503.00     |
| 5                                                                                | 48373.89     |
| 6                                                                                | 44385.64     |
| 7                                                                                | 53667.63     |
| 8                                                                                | 49470.24     |
| 9                                                                                | 51933.00     |
| 10                                                                               | 40811.19     |
| 11                                                                               | 53742.87     |
| 12                                                                               | 48166.58     |
| 13                                                                               | 51457.56     |
| 14                                                                               | 51011.77     |
| 15                                                                               | 52878.38     |
| 16                                                                               | 50447.08     |
| 17                                                                               | 50524.77     |
| 18                                                                               | 56976.40     |
| 19                                                                               | 54955.04     |
| 20                                                                               | 45628.14     |
| 21                                                                               | 48310.61     |
| 22                                                                               | 53465.23     |
| 23                                                                               | 56984.07     |
| 24                                                                               | 54376.66     |

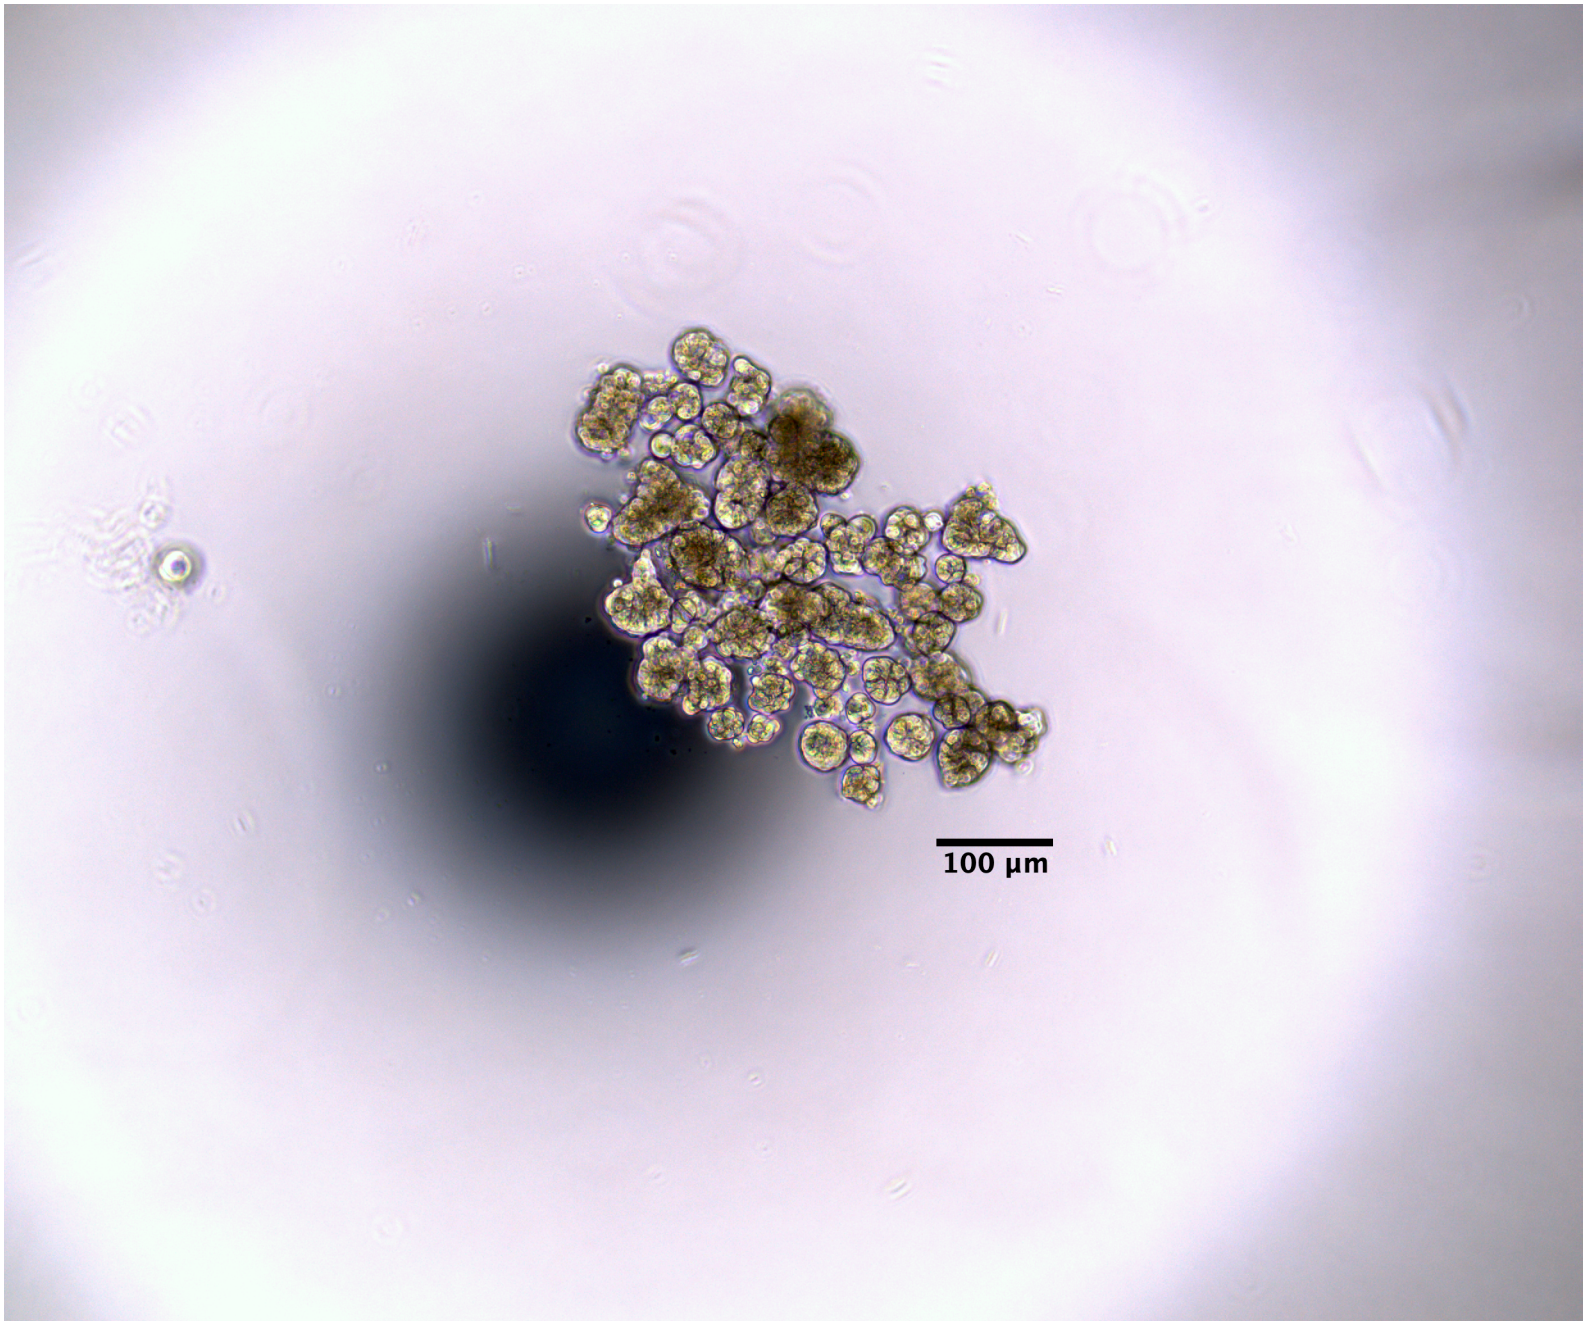

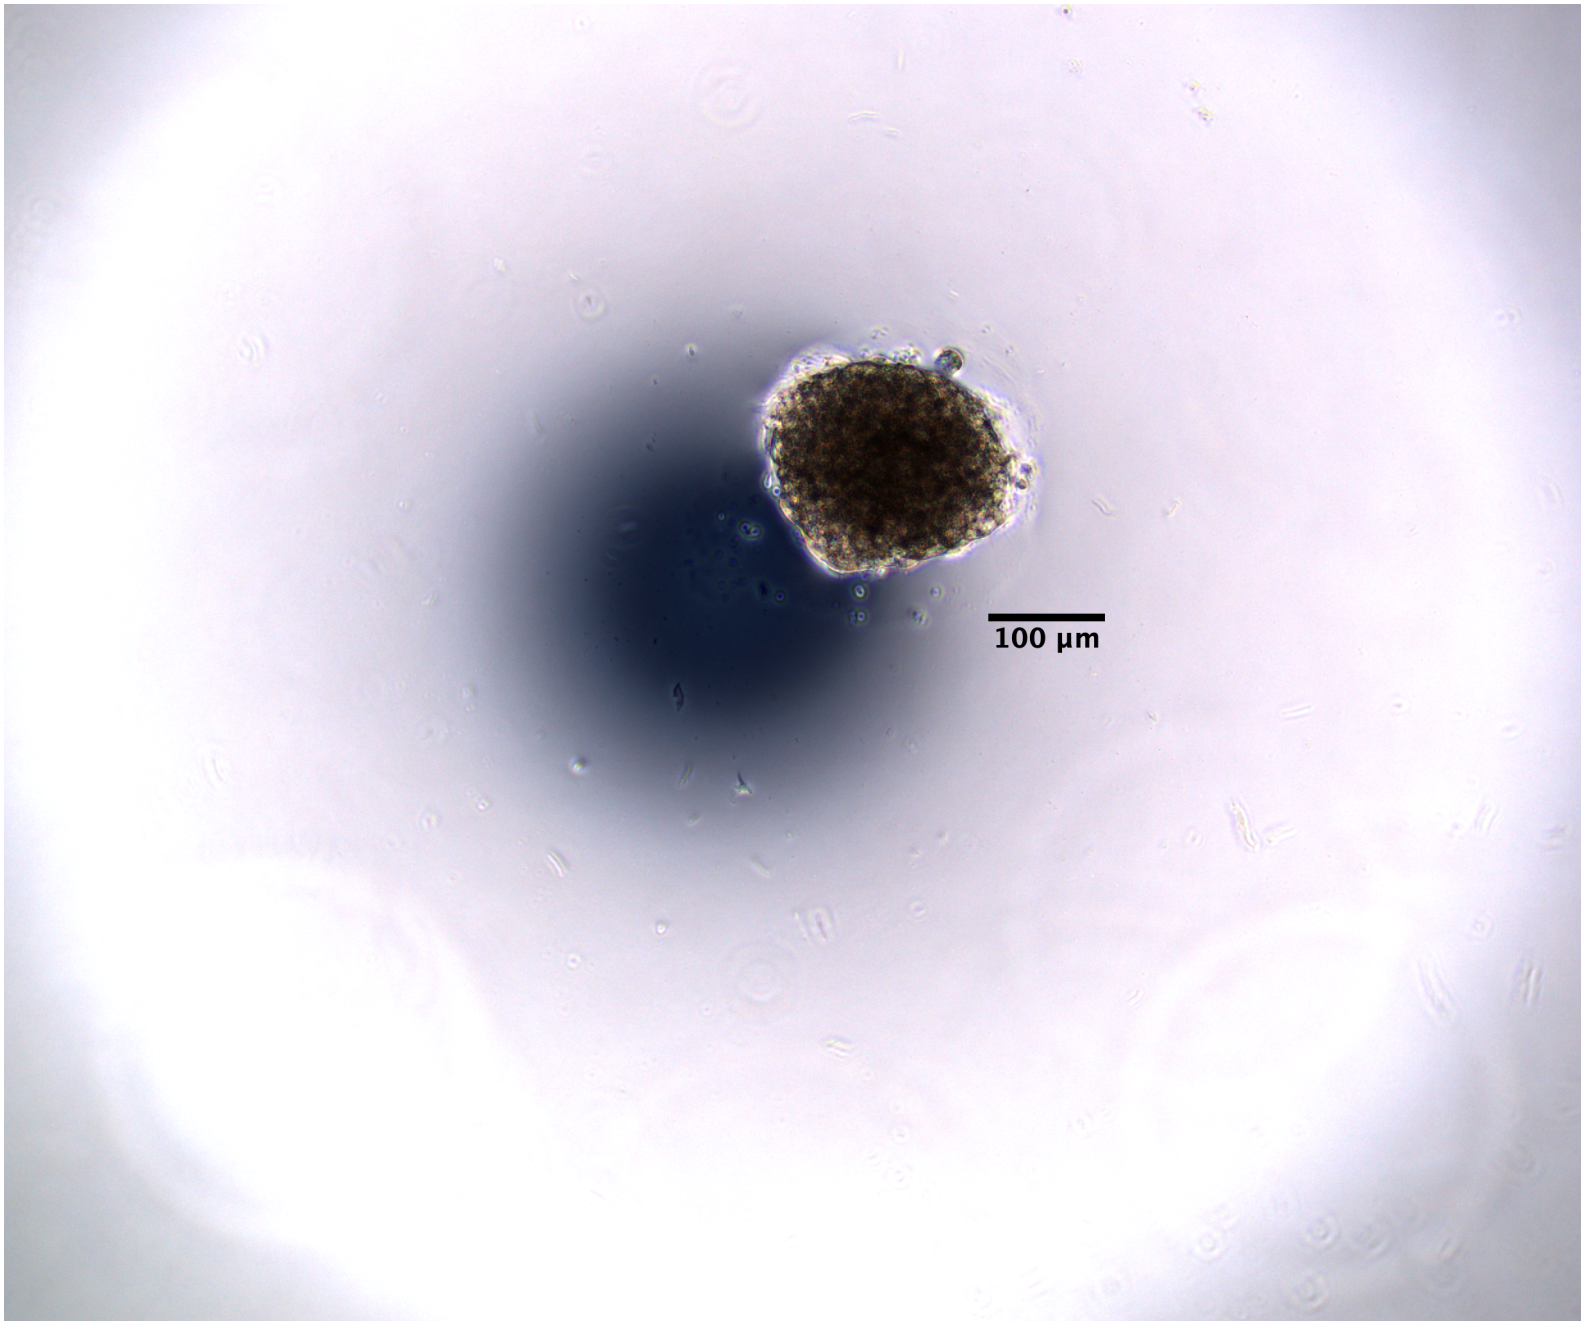

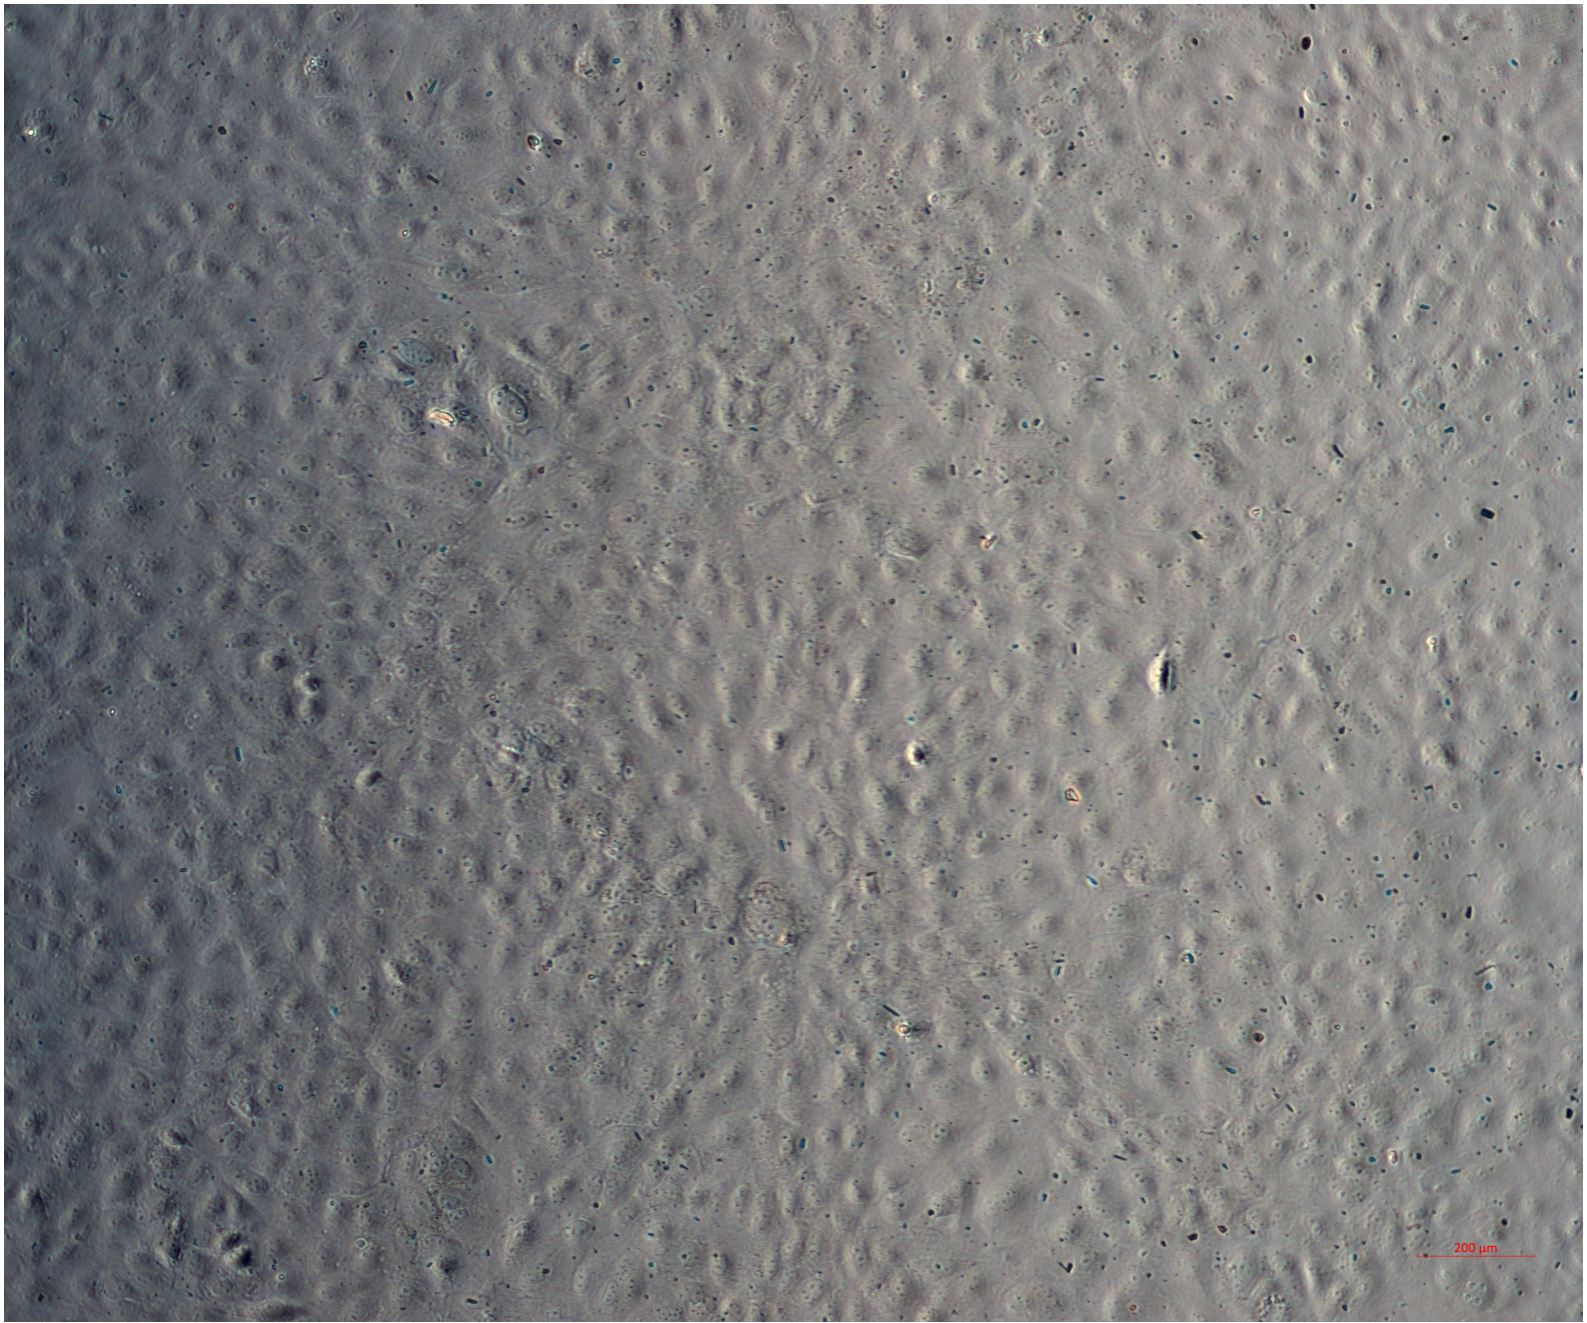

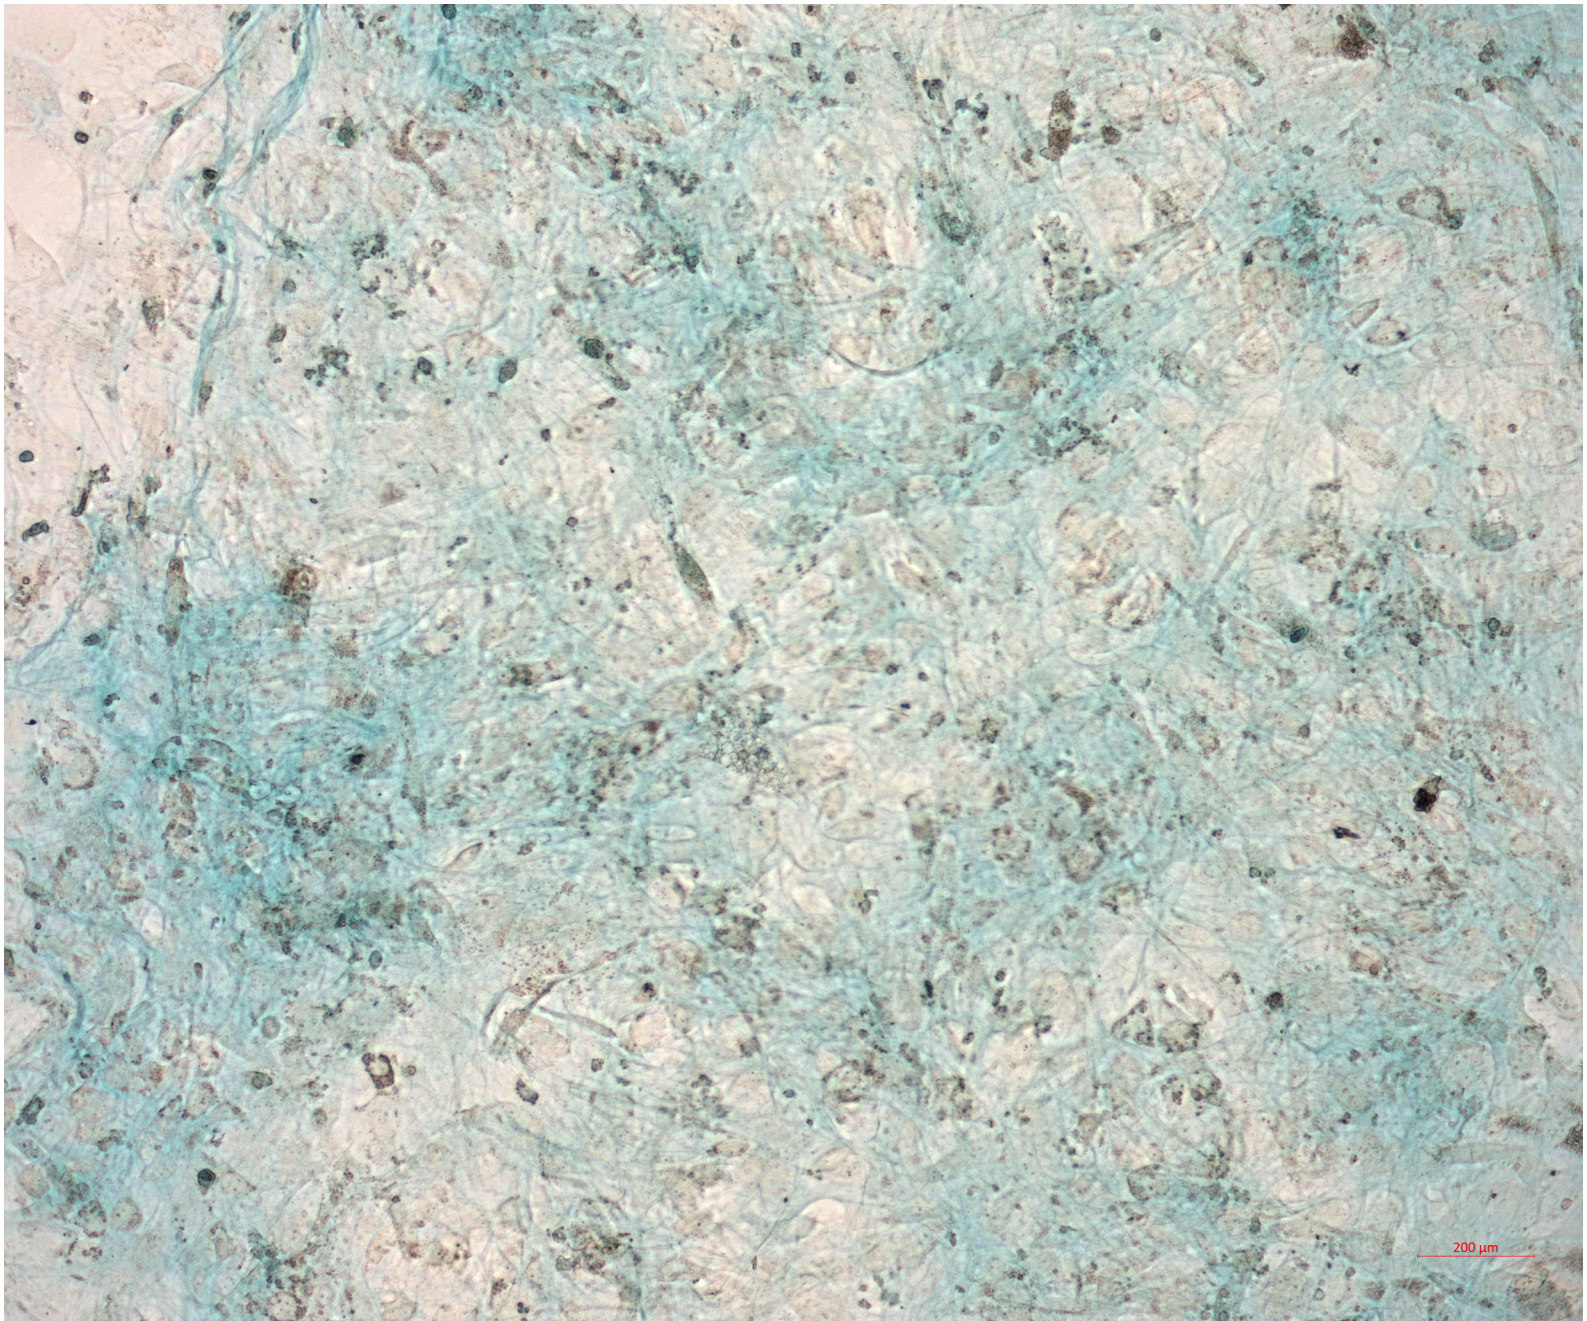

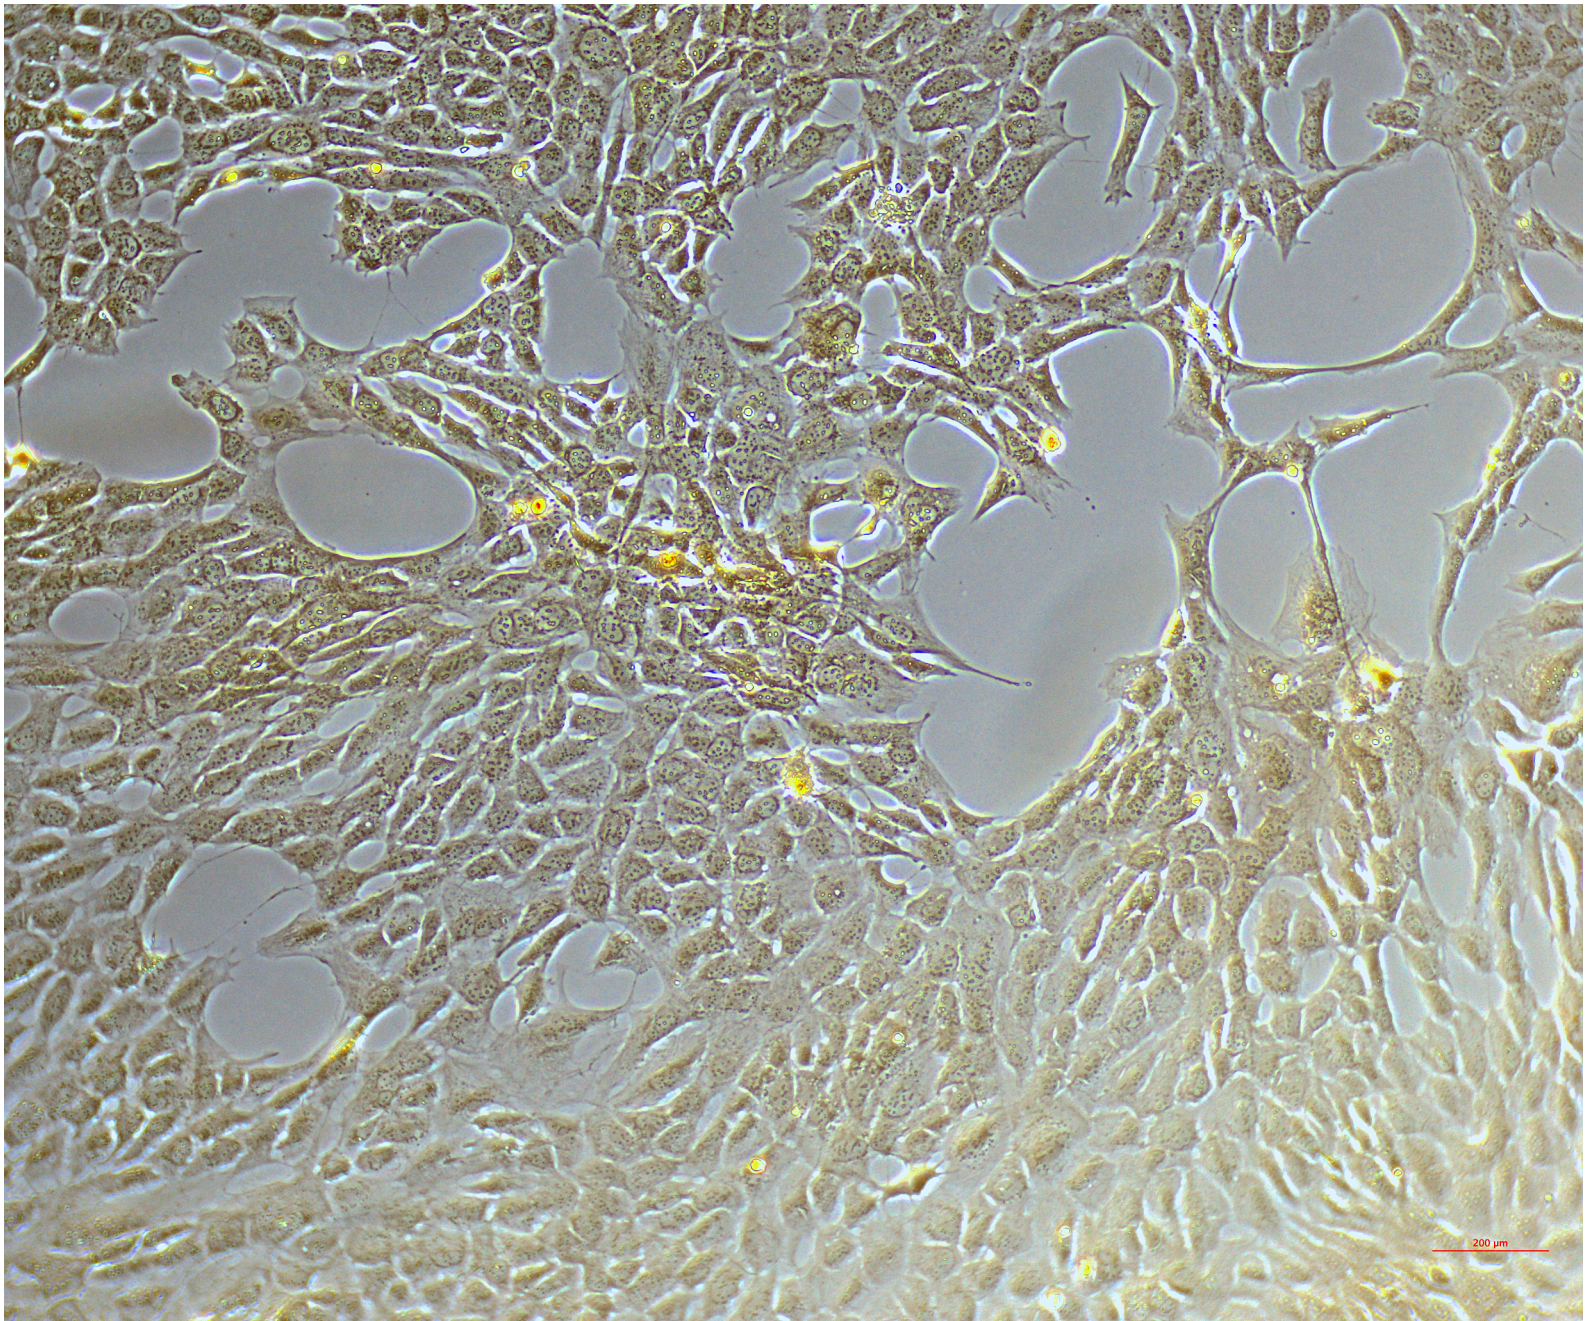

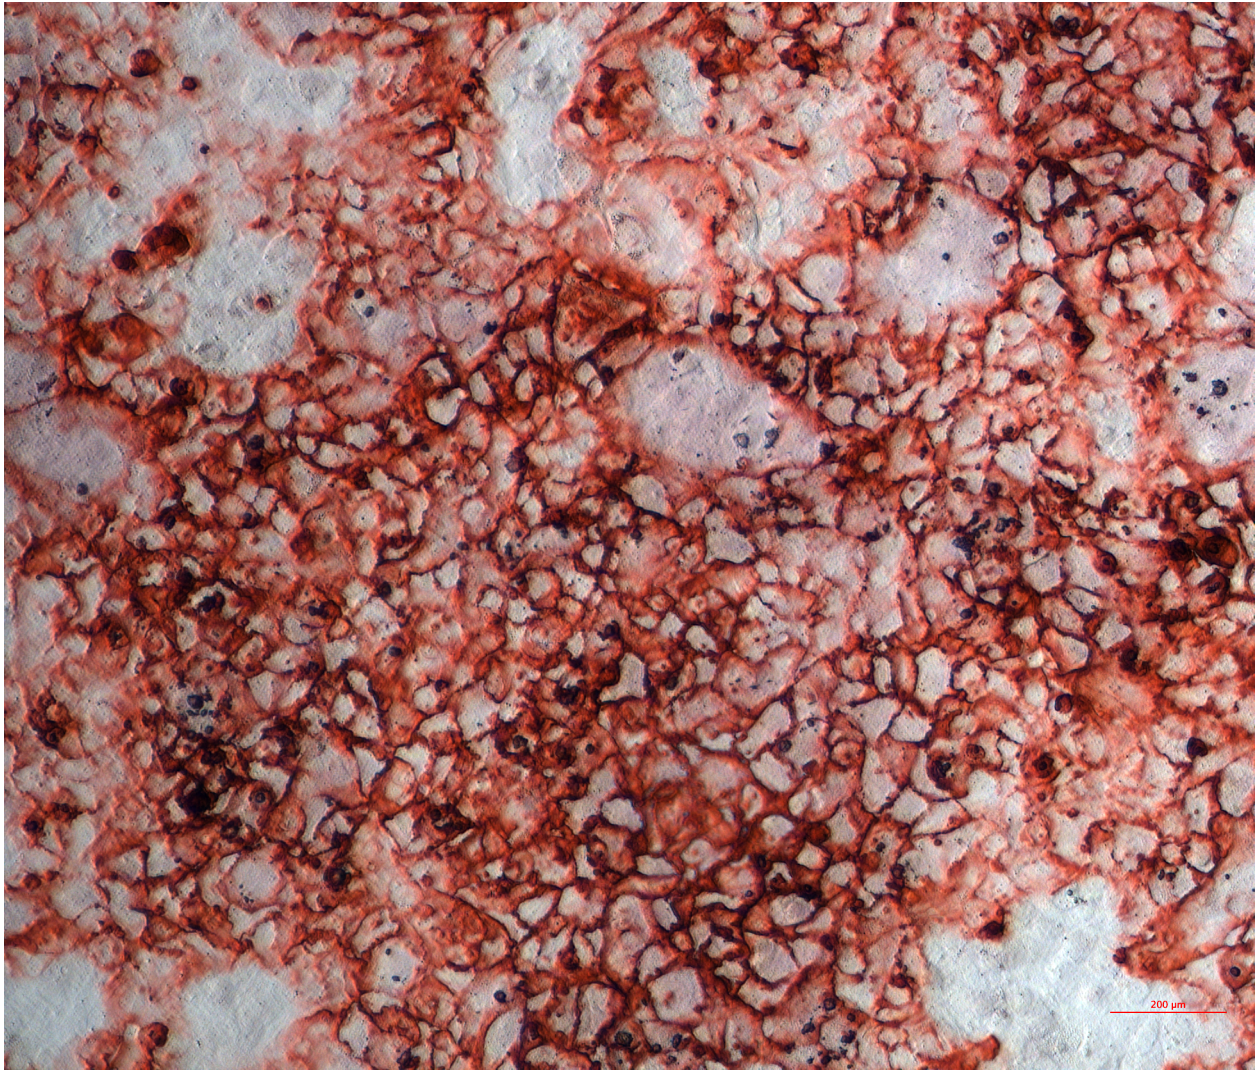



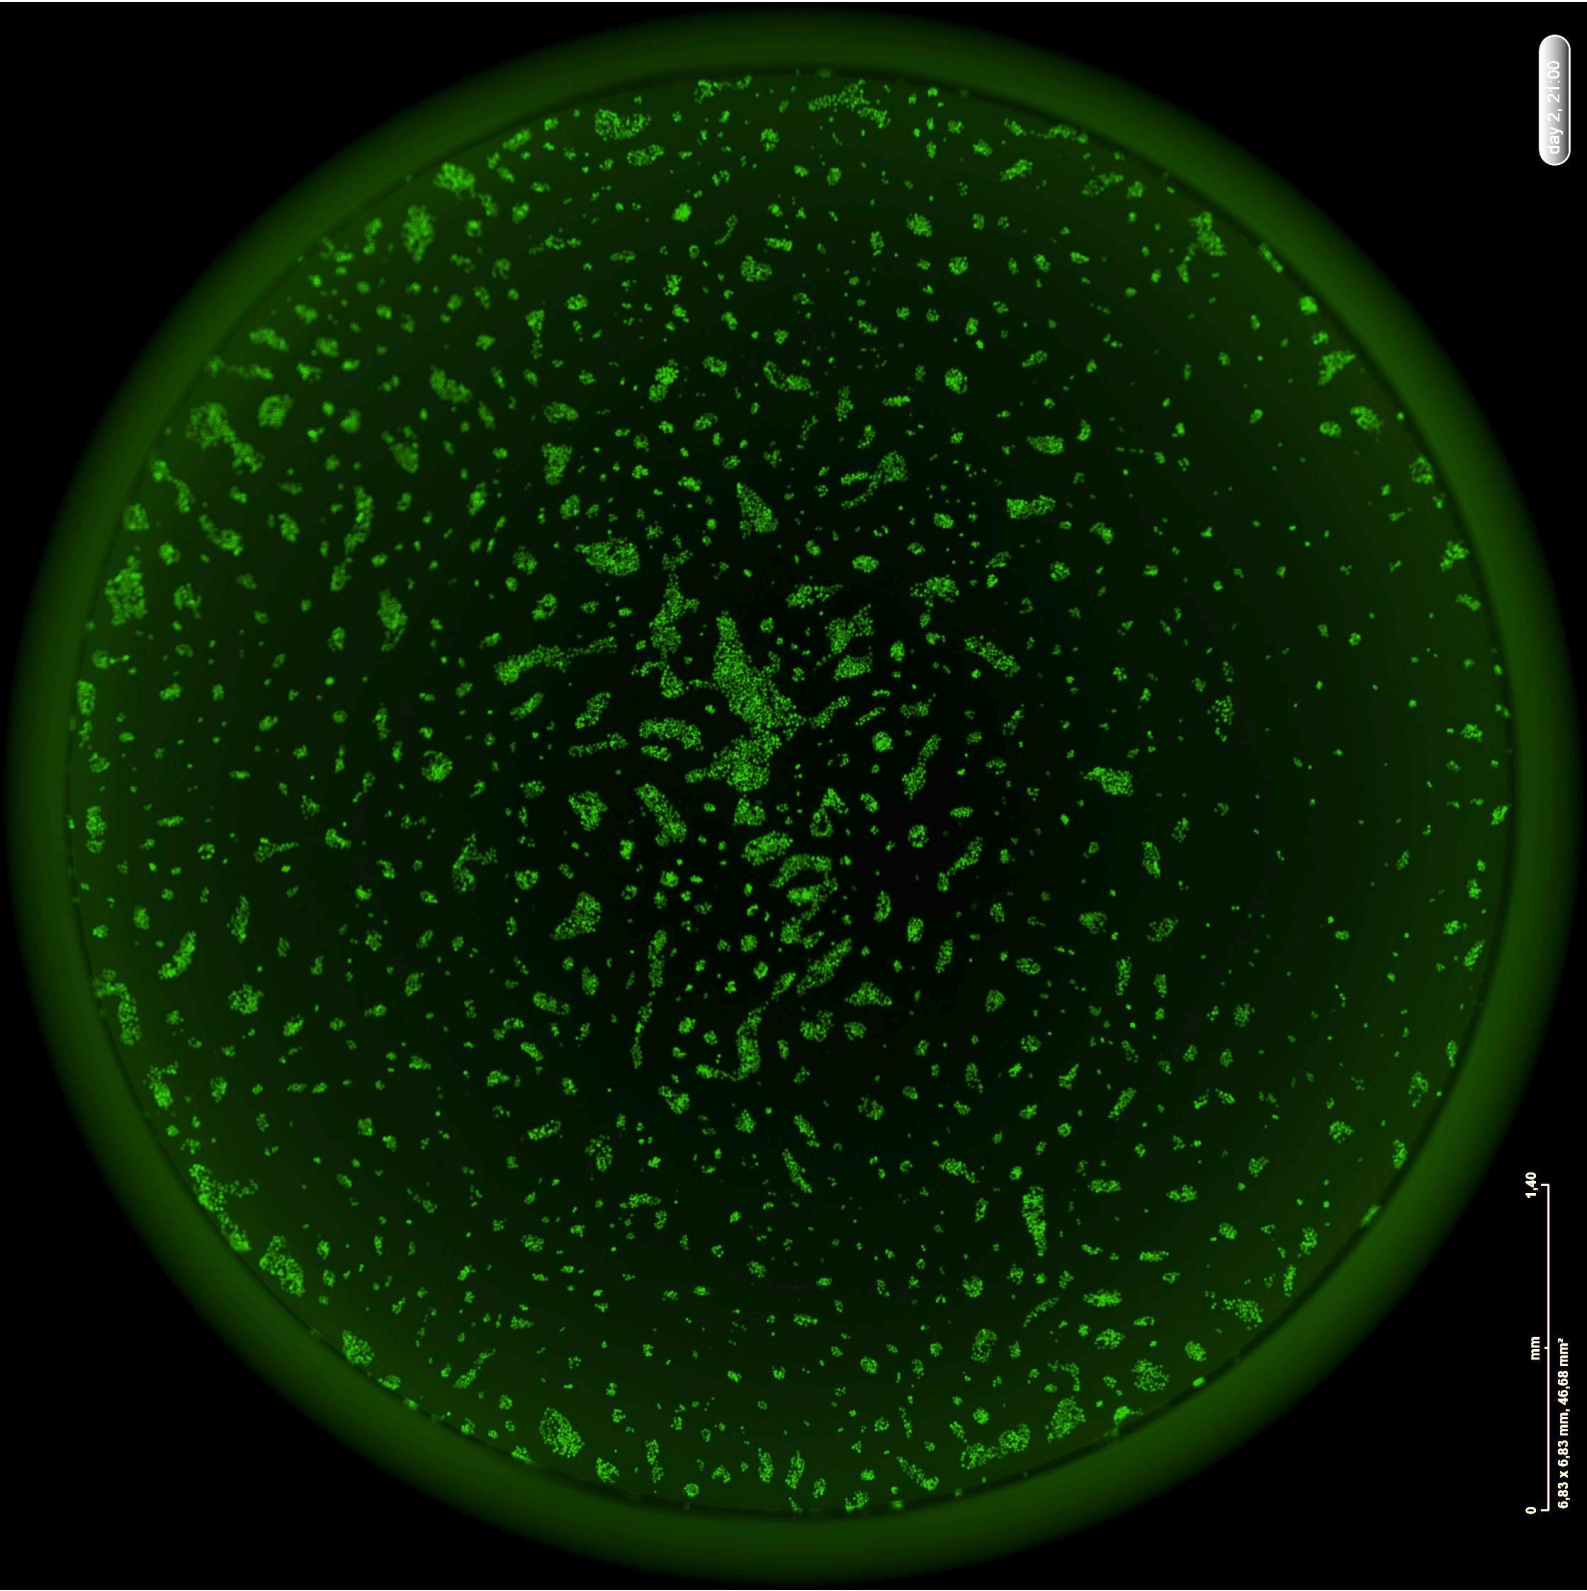

0 1,40 mm  
6,83 x 6,83 mm, 46,68 mm<sup>2</sup>

day 2, 21.00

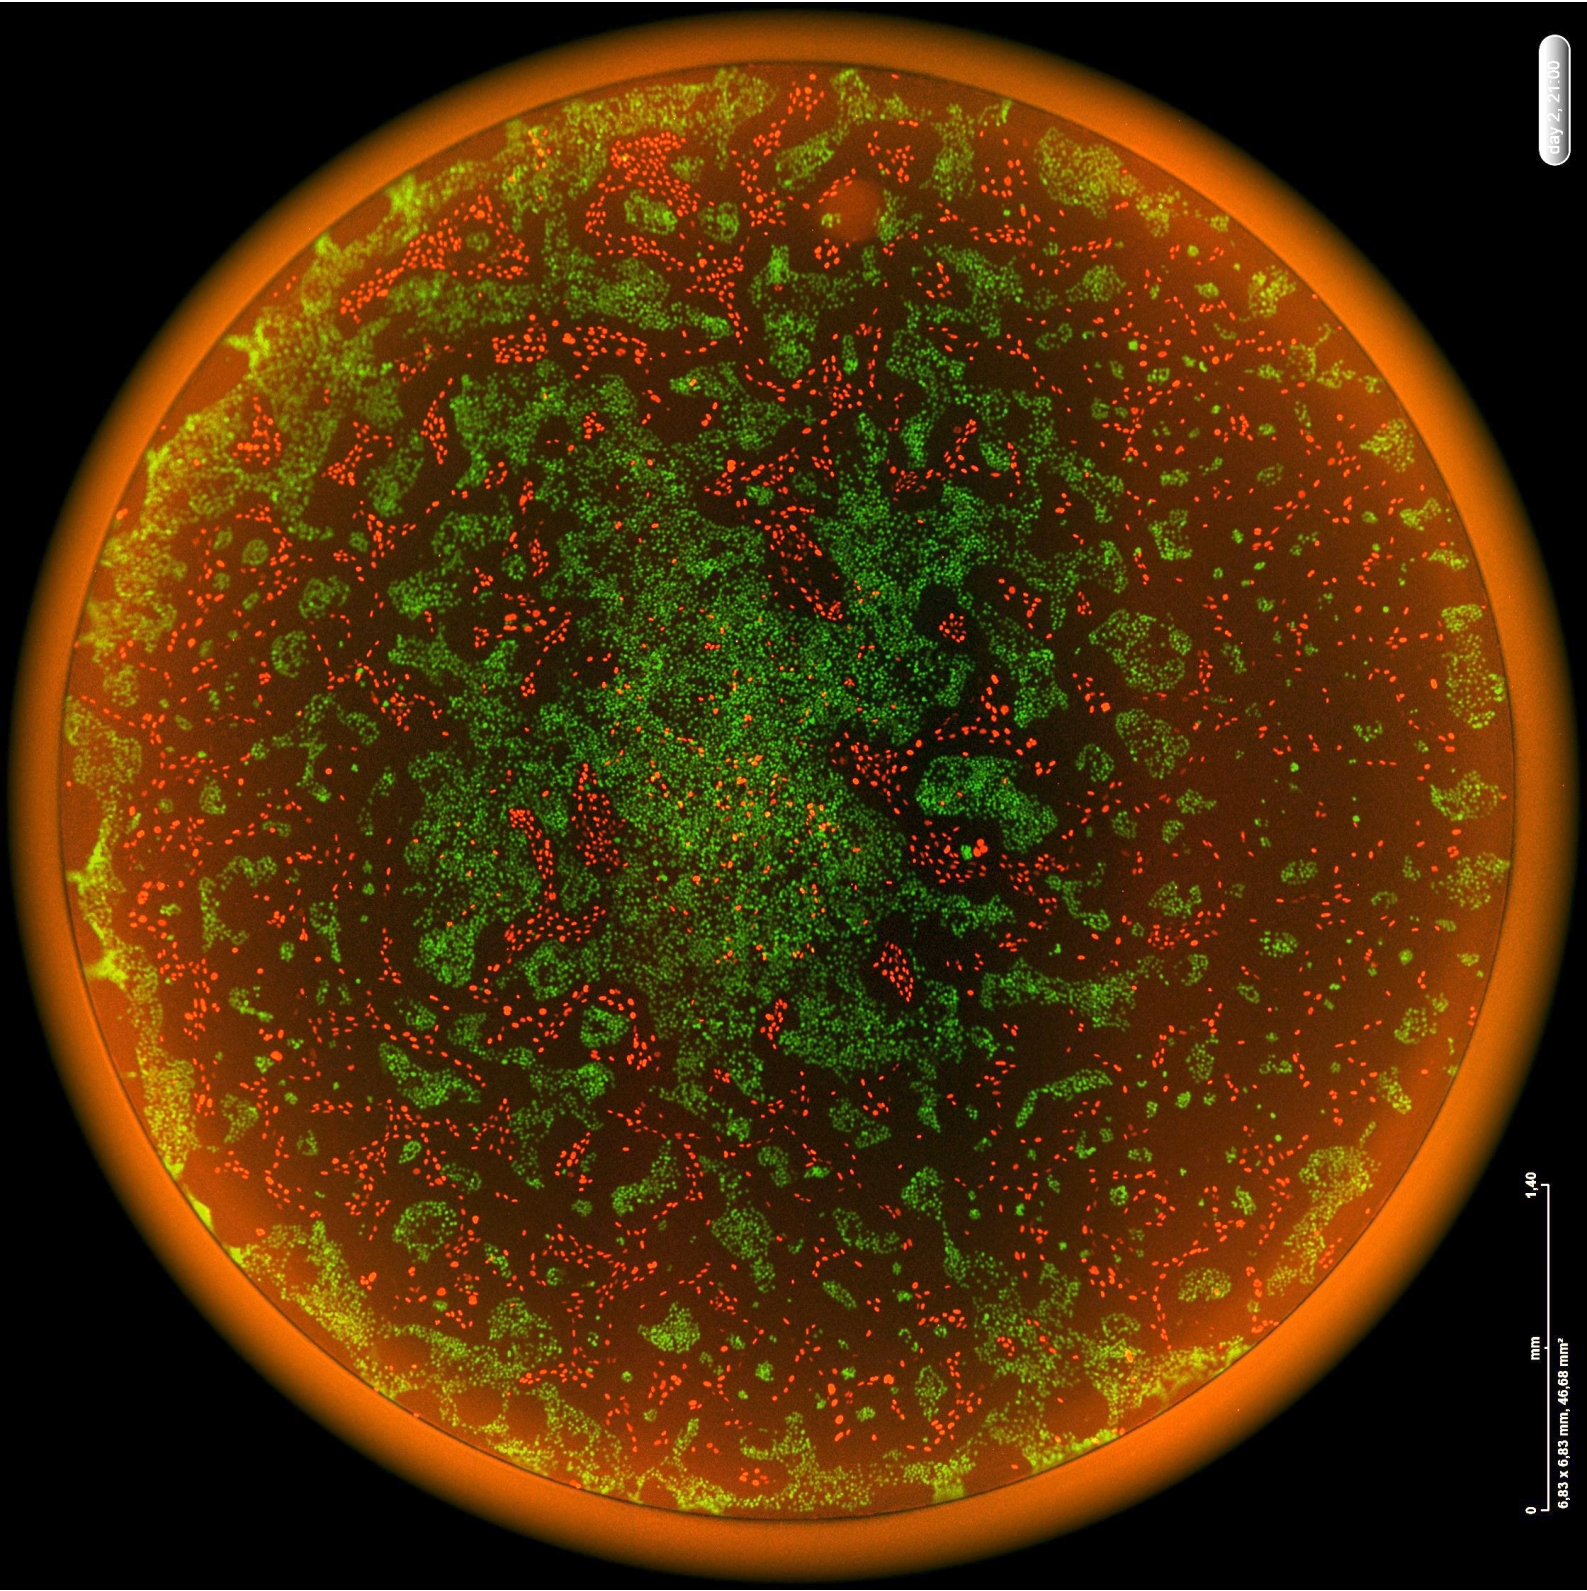

0 1,40 mm  
6,83 x 6,83 mm, 46,68 mm<sup>2</sup>

0.837,2,21.00

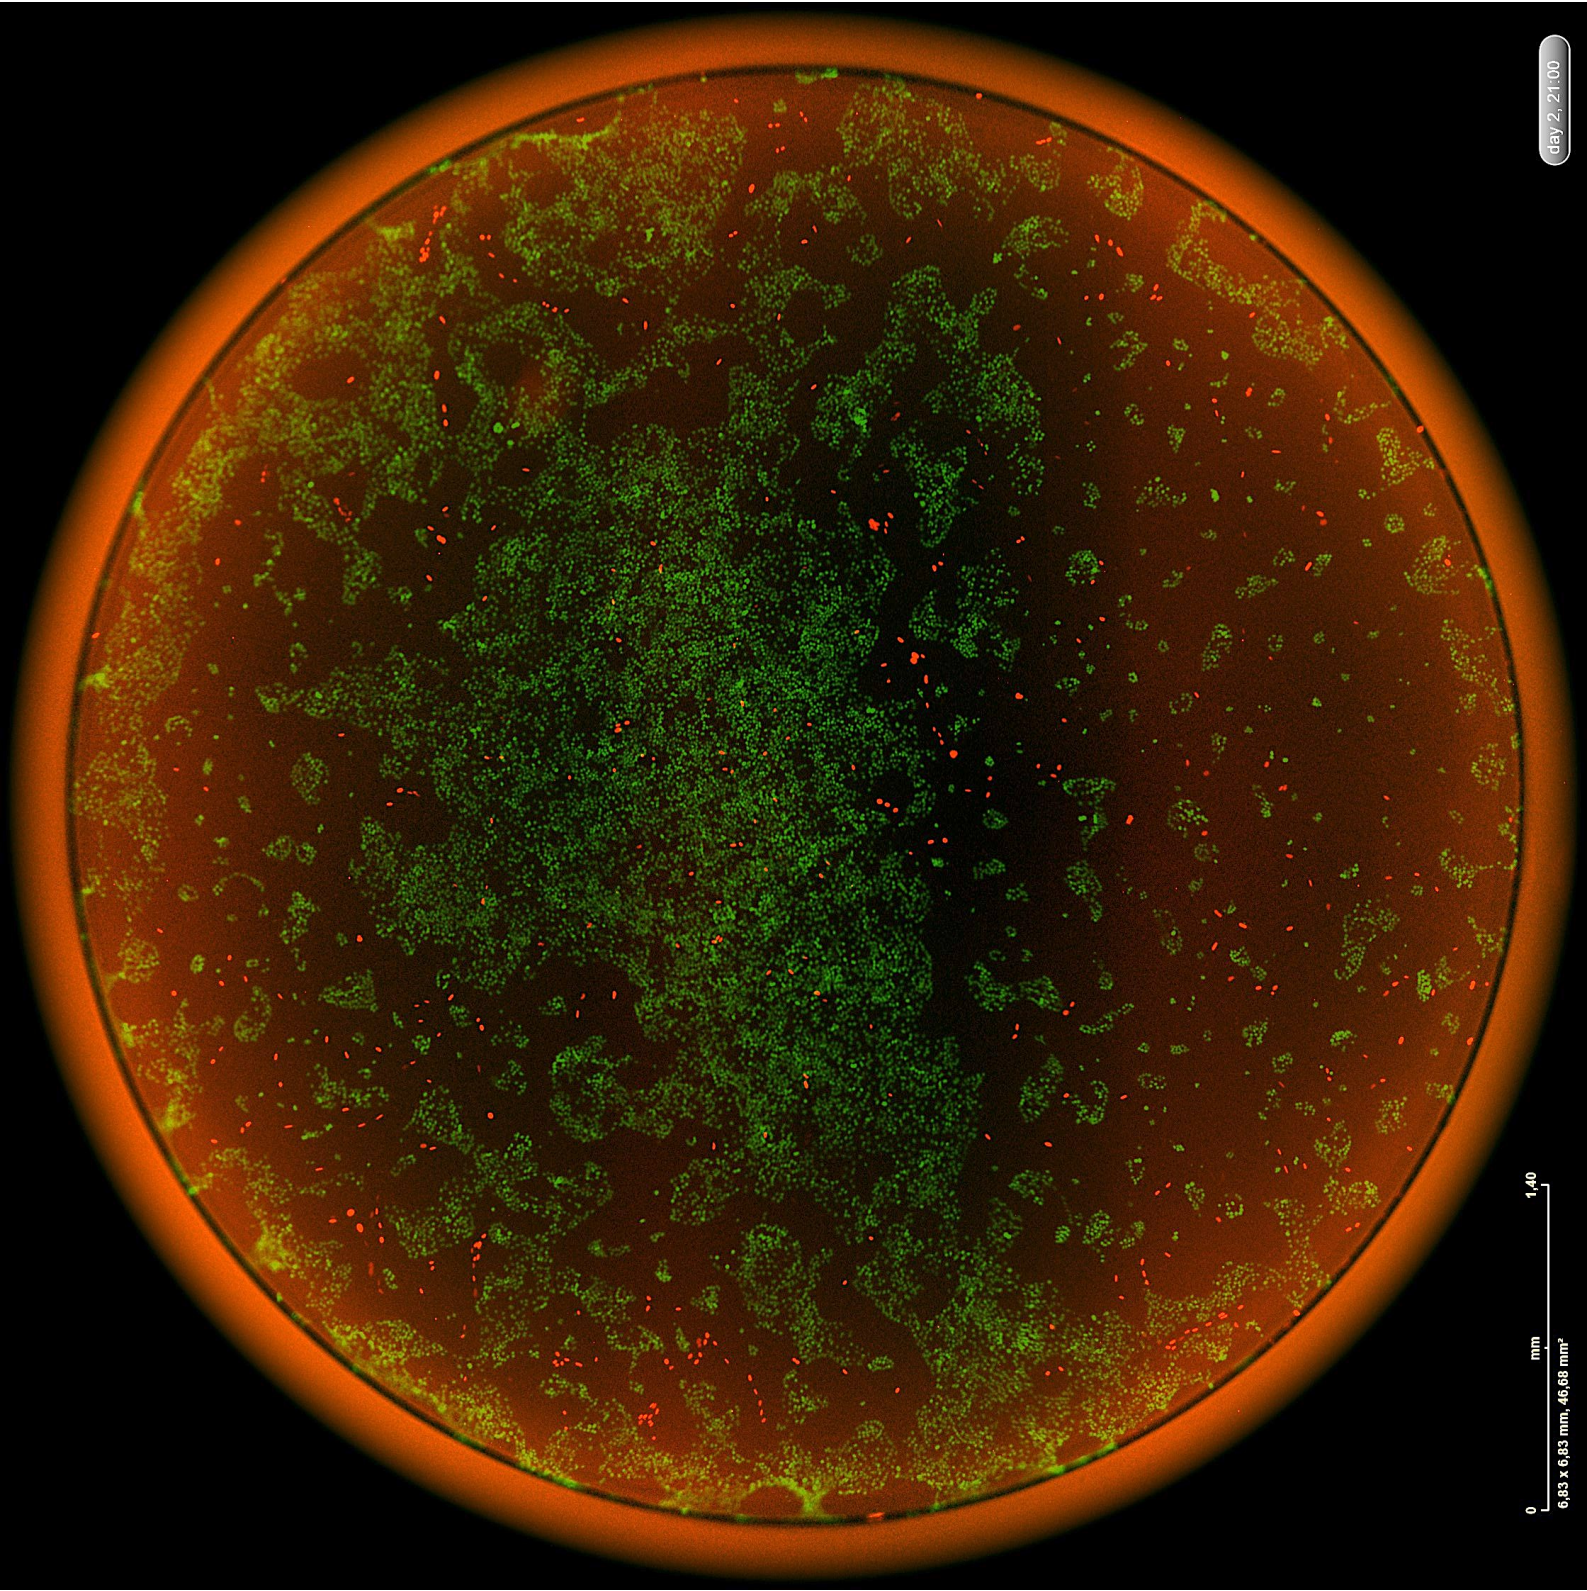

0 1,40 mm  
6,83 x 6,83 mm, 46,68 mm<sup>2</sup>

day 2, 21.00

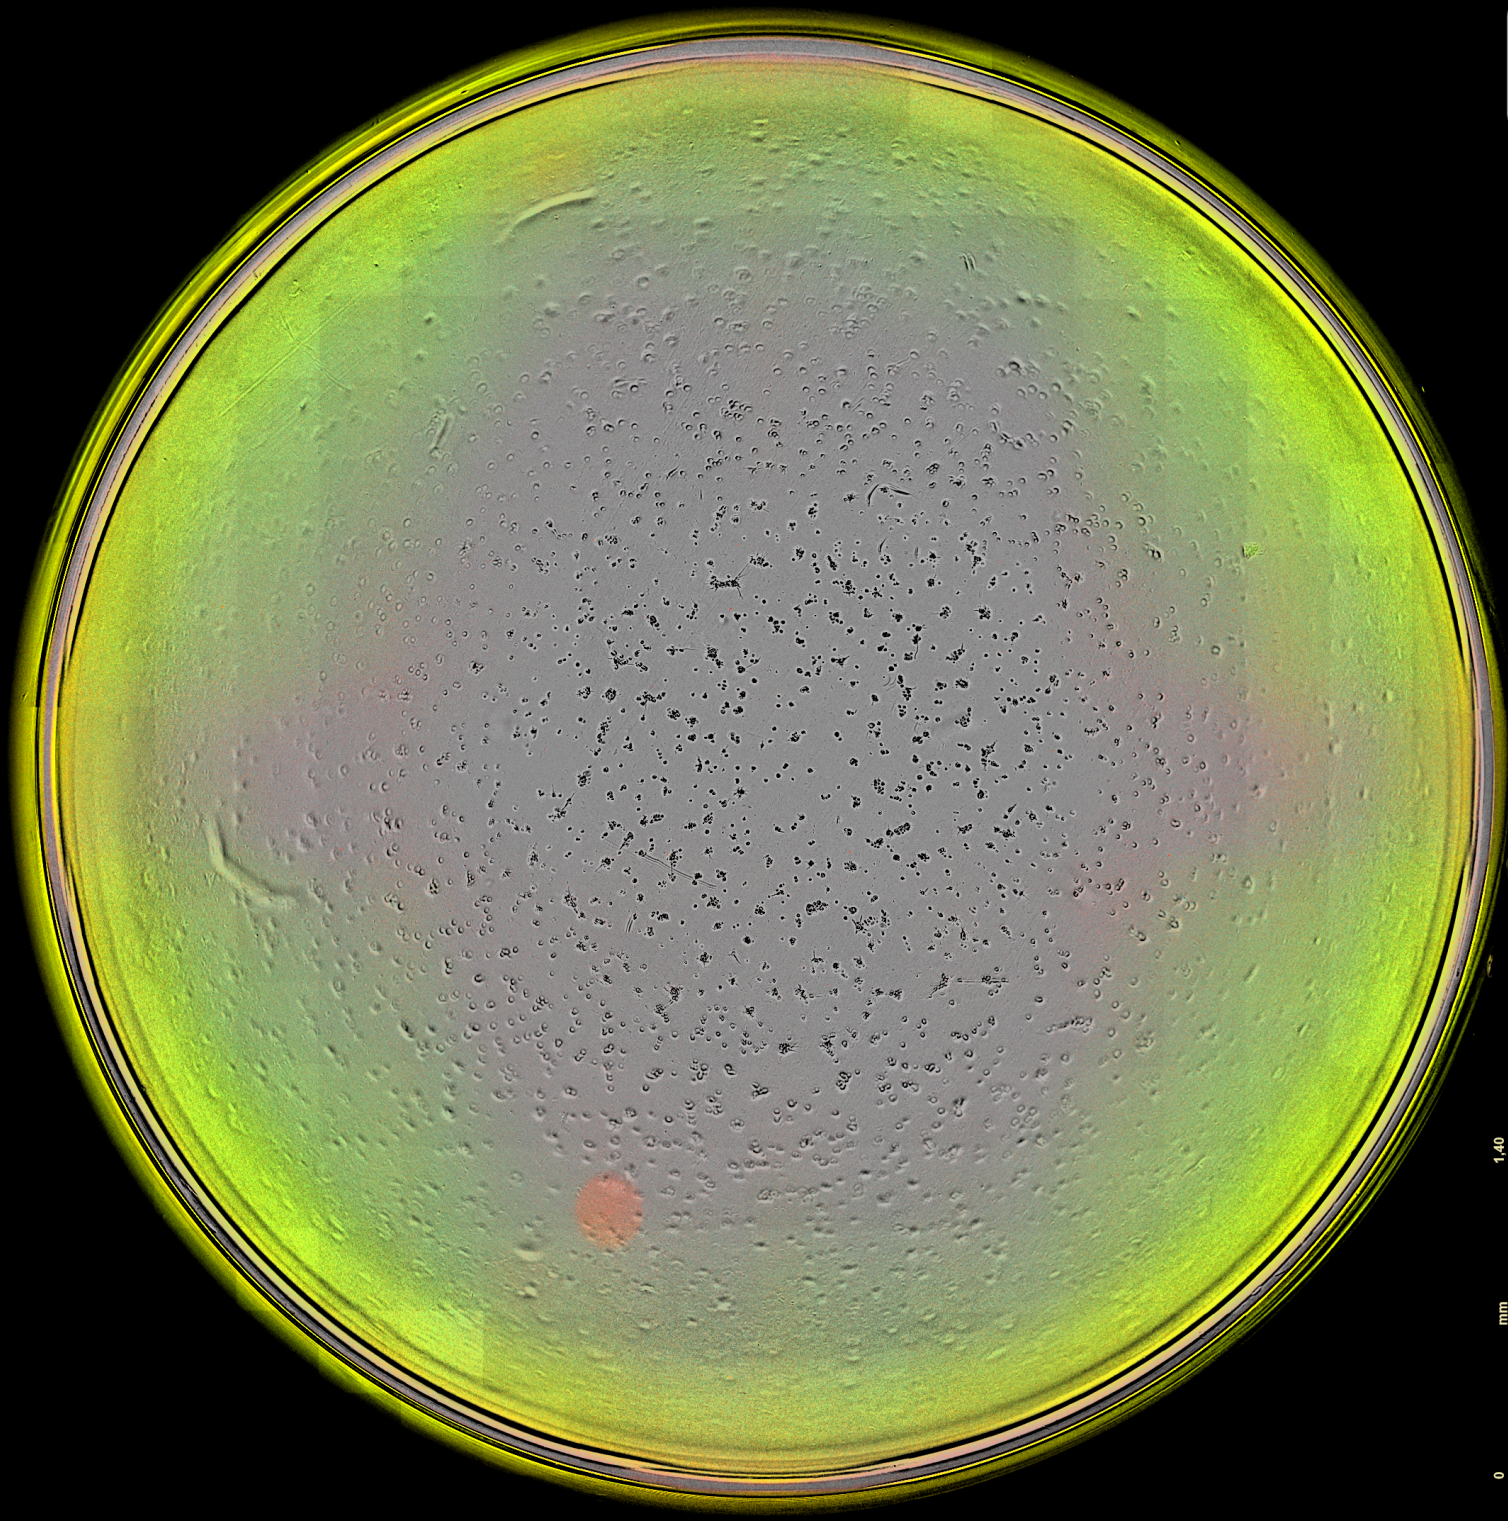

0 1,40 mm  
6,83 x 6,83 mm, 46,68 mm<sup>2</sup>

day 0, 14:00

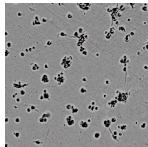

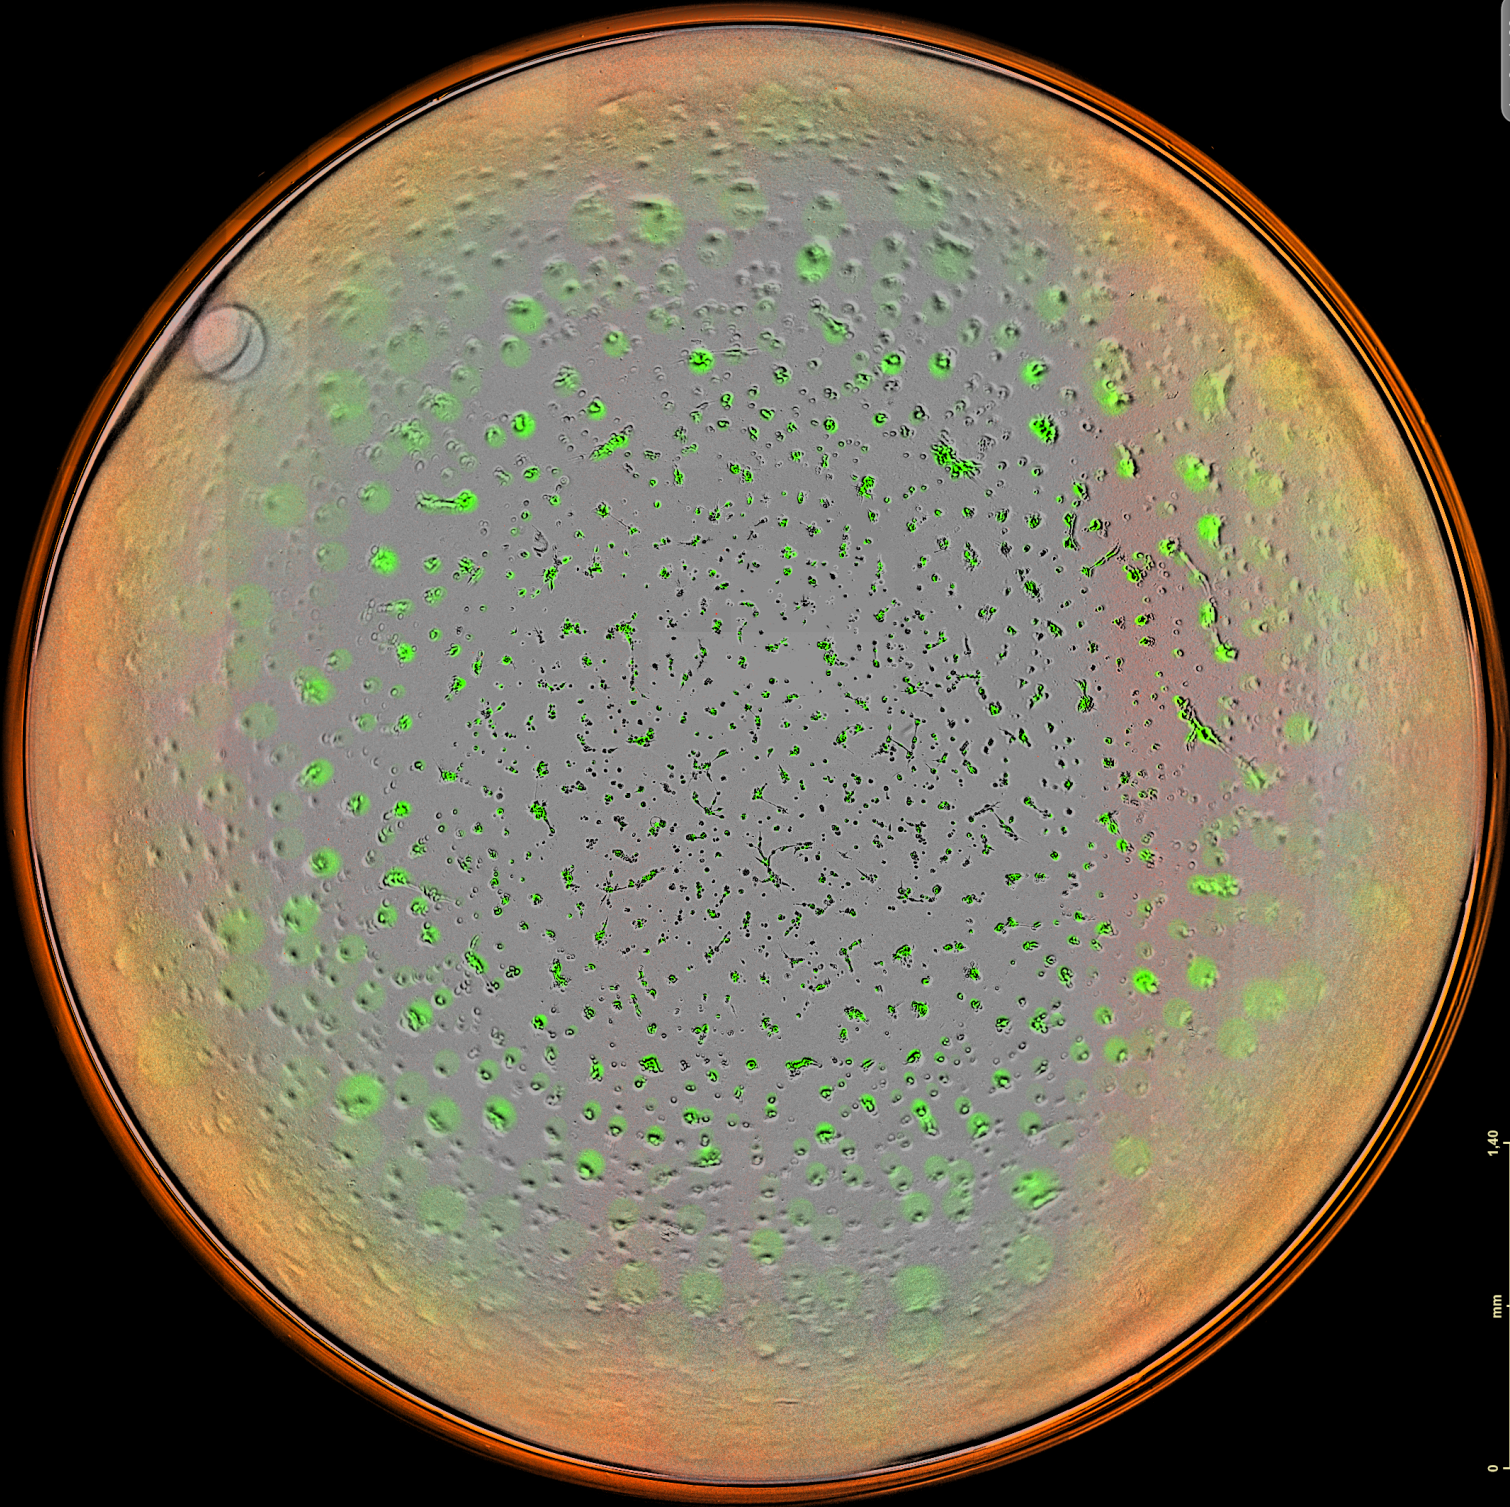

0 1,40  
mm  
6,83 x 6,83 mm, 46,68 mm<sup>2</sup>

day 0, 14:00

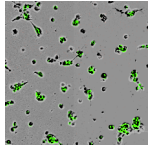

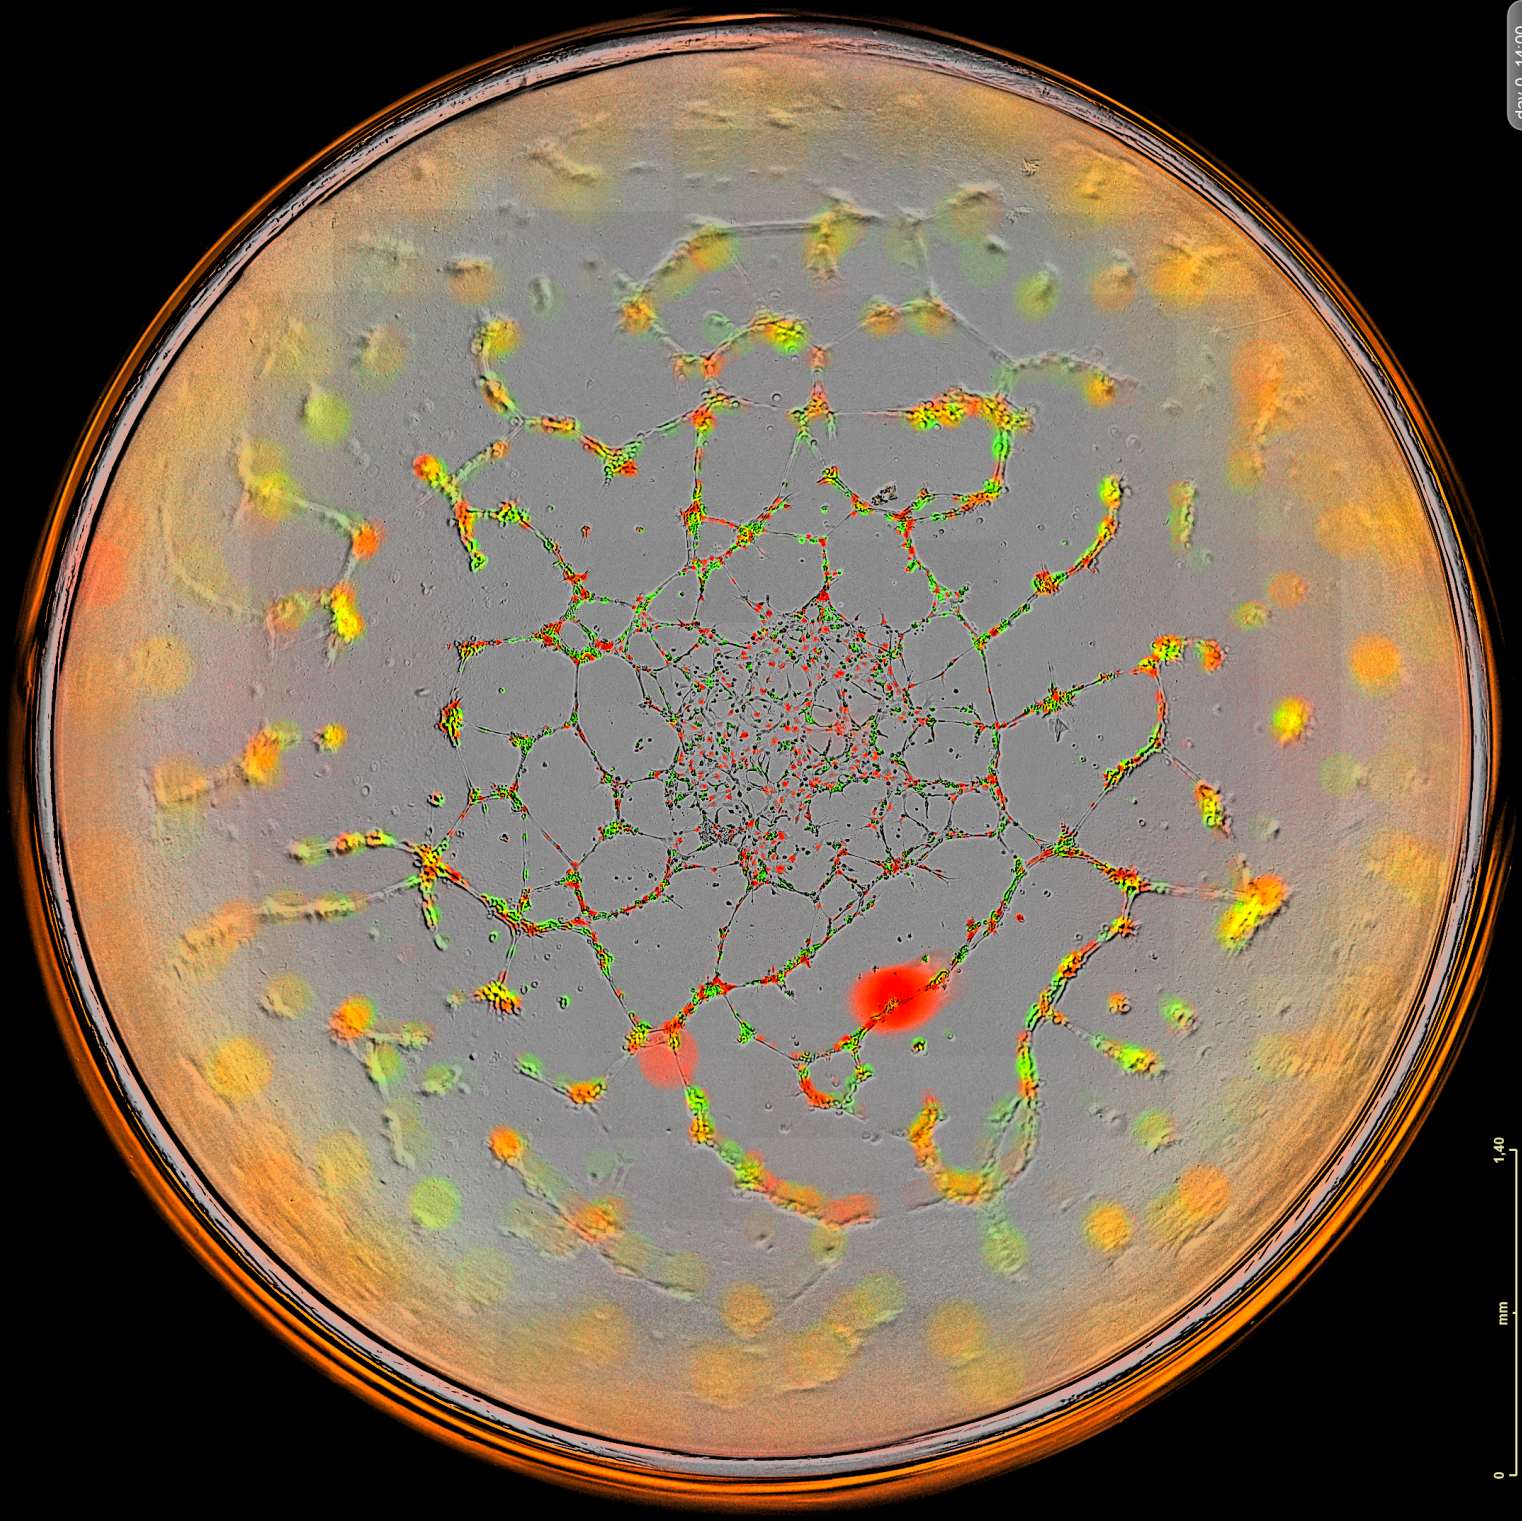

0 1,40 mm  
6,83 x 6,83 mm, 46,68 mm<sup>2</sup>

day 0, 14:00



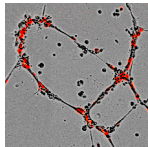

| Table format:<br>Grouped |                                                                                   | Group A      |              | Group B              |              |
|--------------------------|-----------------------------------------------------------------------------------|--------------|--------------|----------------------|--------------|
|                          |                                                                                   | UT           |              | PDGF-BB+TGF- $\beta$ |              |
|                          |  | A:Y1         | A:Y2         | B:Y1                 | B:Y2         |
| 1                        | PDGFR $\alpha$                                                                    | 0.0299354700 | 0.0398576300 | 0.0046132520         | 0.0044069610 |
| 2                        | PDGFR $\beta$                                                                     | 0.0389023200 | 0.0381810200 | 0.0294008300         | 0.0237323800 |
| 3                        | Acta2                                                                             | 0.2600749000 | 0.3166585000 | 0.0794945700         | 0.0876562600 |
| 4                        | Desmin                                                                            | 0.0005143368 | 0.0005233270 | 0.0002788934         | 0.0003321219 |

| Table format:<br>Grouped |                | Group A |        |        | Group B |        |        |
|--------------------------|----------------|---------|--------|--------|---------|--------|--------|
|                          |                | unTr    |        |        | Tr      |        |        |
|                          | ⊗              | A:Y1    | A:Y2   | A:Y3   | B:Y1    | B:Y2   | B:Y3   |
| 1                        | PDGFR $\alpha$ | 458.00  | 498.00 | 442.00 | 34.50   | 33.80  | 39.40  |
| 2                        | PDGFR $\beta$  | 33.10   | 36.70  | 51.00  | 9.11    | 10.50  | 9.62   |
| 3                        | $\alpha$ -SMA  | 320.00  | 300.00 | 311.00 | 221.00  | 230.00 | 205.00 |
| 4                        | CD61           | 232.00  | 224.00 | 252.00 | 160.00  | 173.00 | 164.00 |
