# Supplementary material for: Pericyte stem cells induce Ly6G + cell accumulation and immunotherapy resistance in pancreatic cancer
Source: PubMed Central journal article supplement — EMBO Rep. 2023 Feb 21;24(4):e56524. doi: 10.15252/embr.202256524 (PMC10074138; doi:10.15252/embr.202256524), 2023-02-21
Supplement: EMBR-24-e56524-s006.pdf [file EMBR-24-e56524-s006.pdf]

Appendix for  
"CD106<sup>+</sup> pericyte stem cells induce Ly6G<sup>+</sup> cell accumulation and resistance to  
immunotherapy in pancreatic cancer"

|                          |     |
|--------------------------|-----|
| Appendix Figure S1.....  | 2   |
| Appendix Figure S2 ..... | 3   |
| Appendix Figure S3 ..... | 4-5 |
| Appendix Figure S4 ..... | 6   |
| Appendix Figure S5 ..... | 7-9 |
| Appendix Figure S6 ..... | 10  |
| Appendix Figure S7 ..... | 11  |
| Appendix Table S1 .....  | 12  |

## Appendix Figure S1

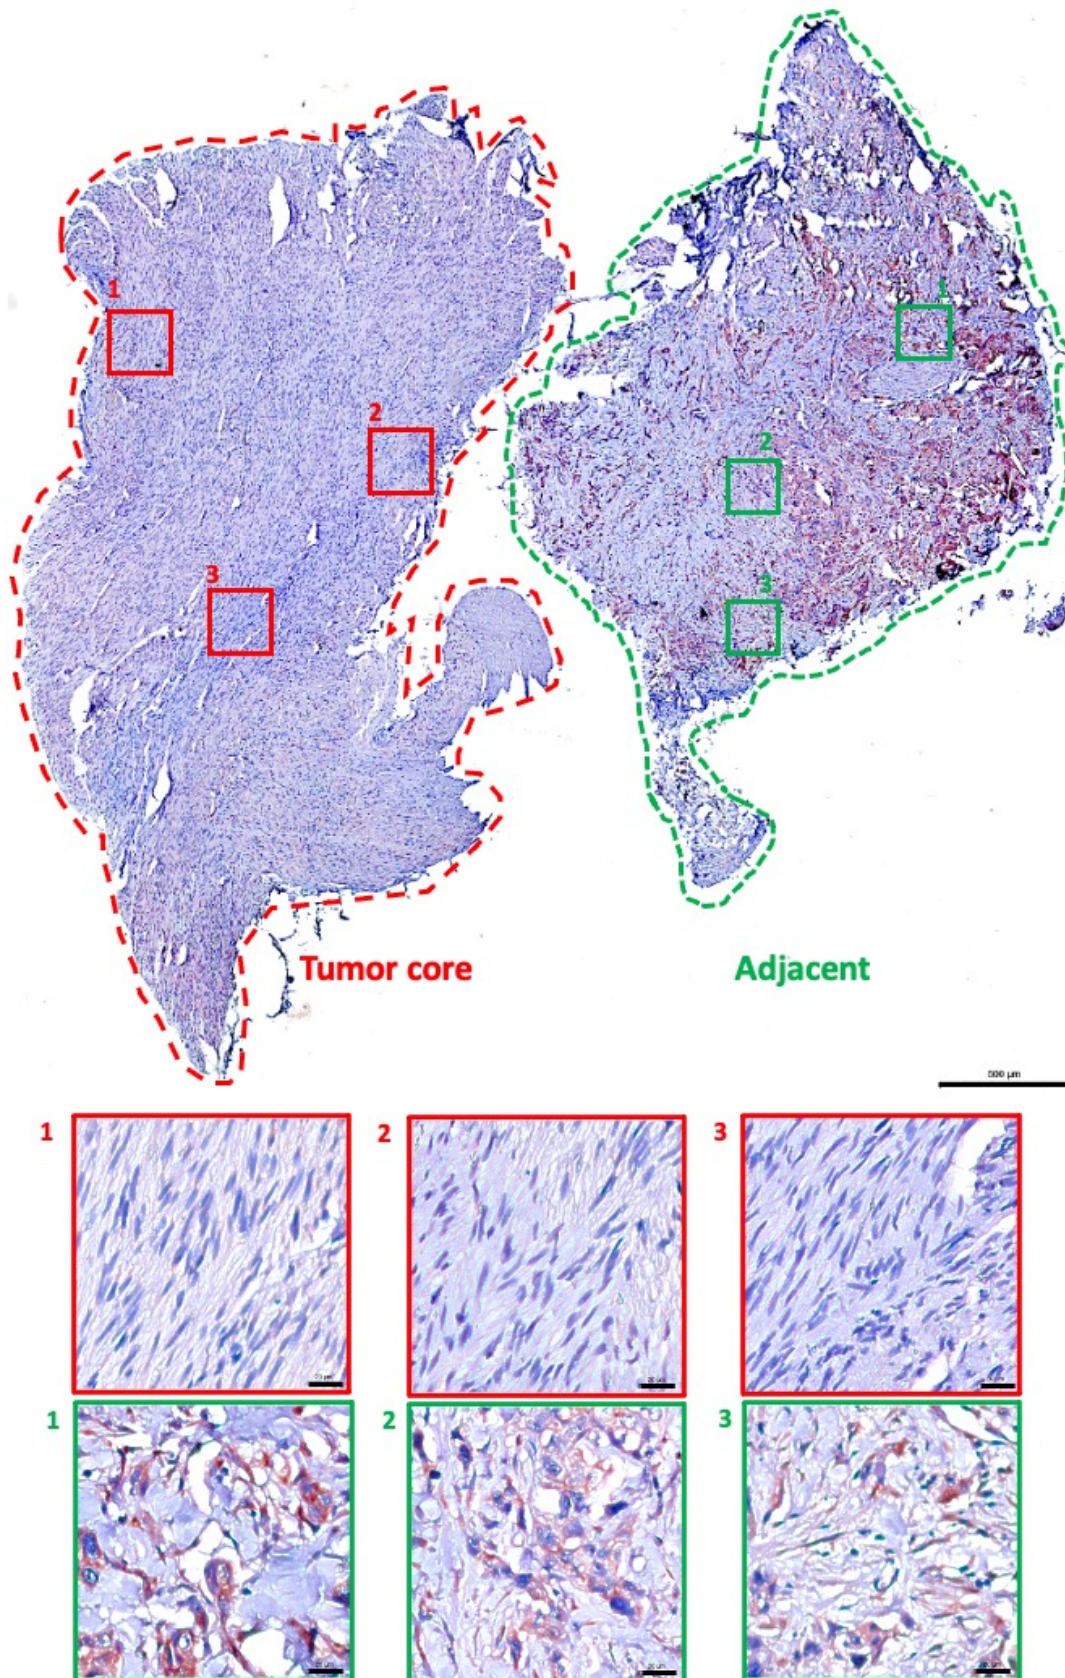

Appendix Figure S1: The CD106<sup>+</sup> population is uniquely localized in pancreatic injury and precancerous lesions. Representative IHC staining of tumor core and adjacent region in PDAC patient (stage III) for CD106<sup>+</sup>. The corresponding magnification insets of tumor core (red dotted line) or adjacent region (green dotted line) are displayed below the gross figure. Scale bar, 500 μm in gross, 20 μm in magnification.

## Appendix Figure S2

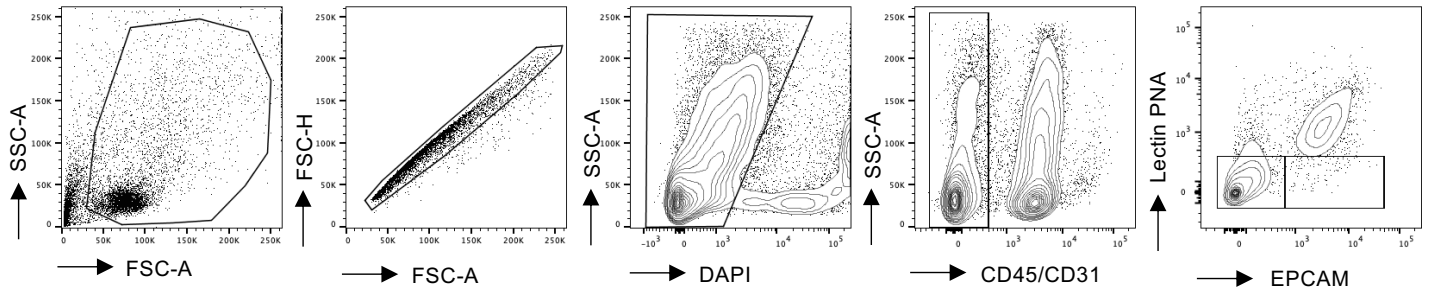

Appendix Figure S2: Gating strategy for FACS sorting and single cell RNAseq.

# Appendix Figure S3

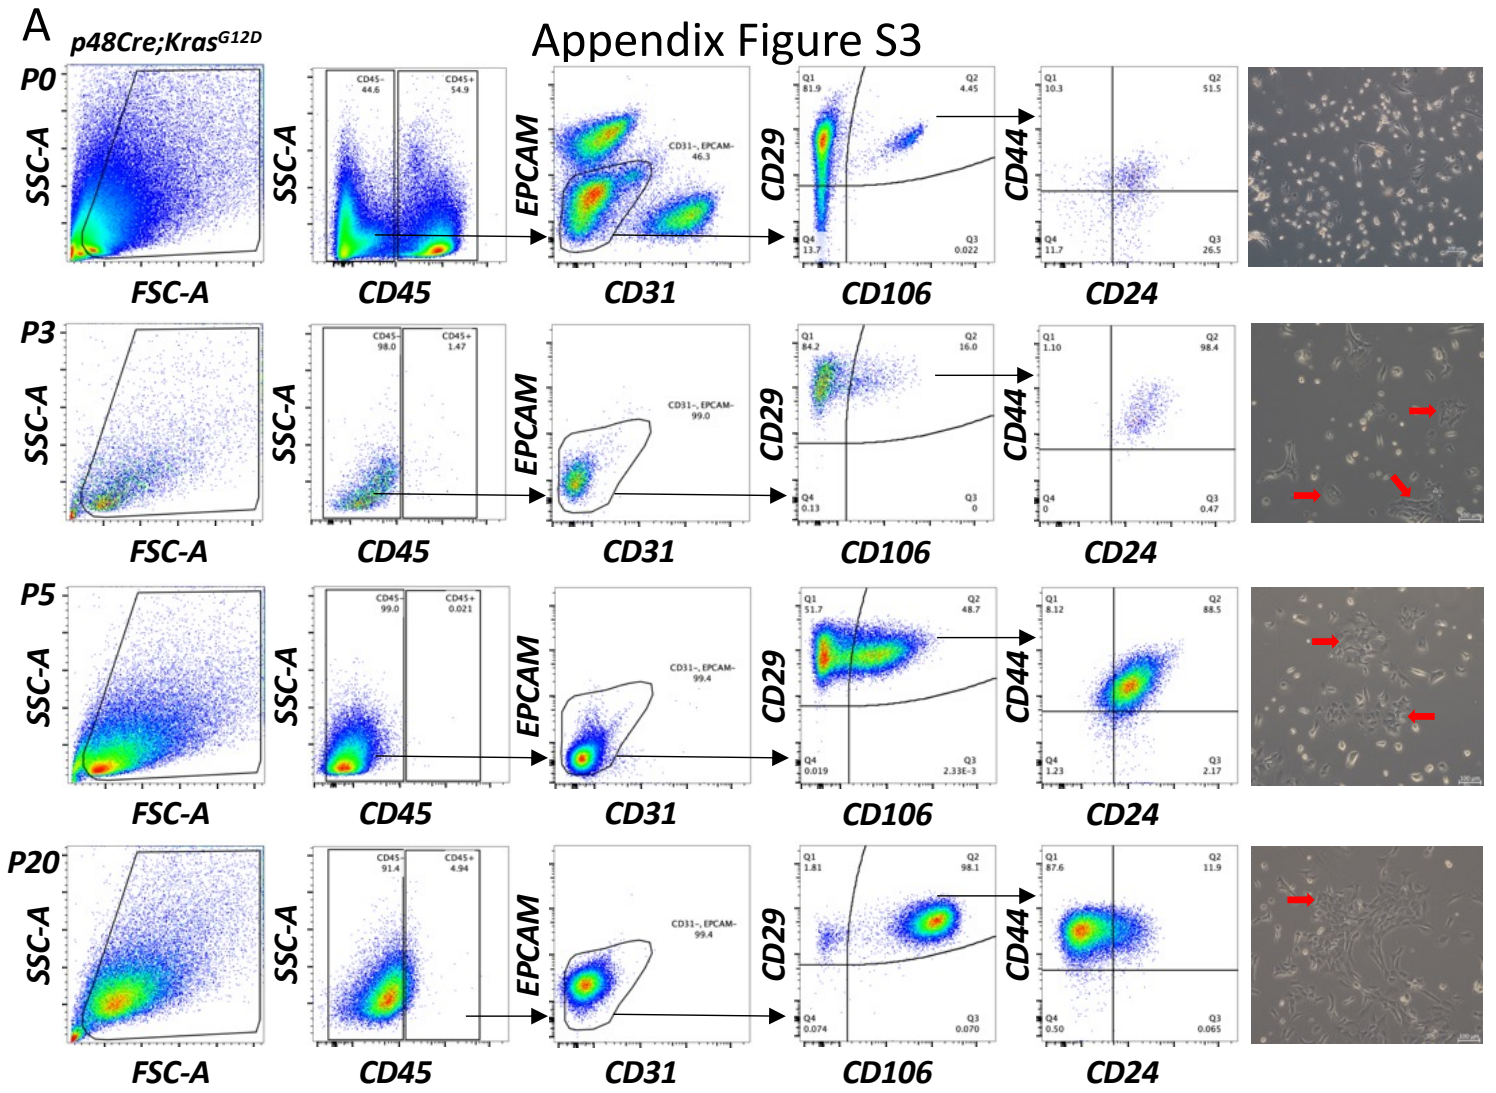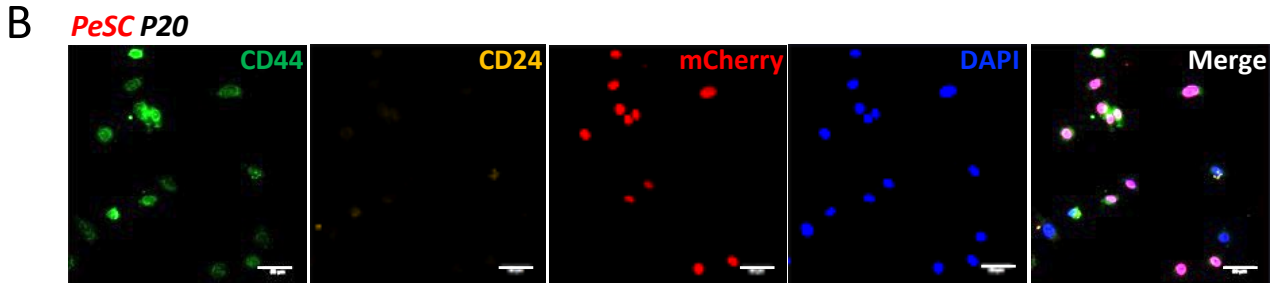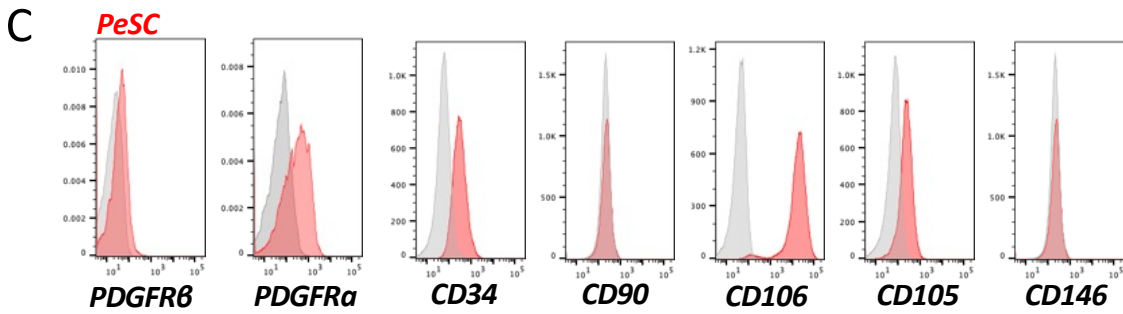

# Appendix Figure S3

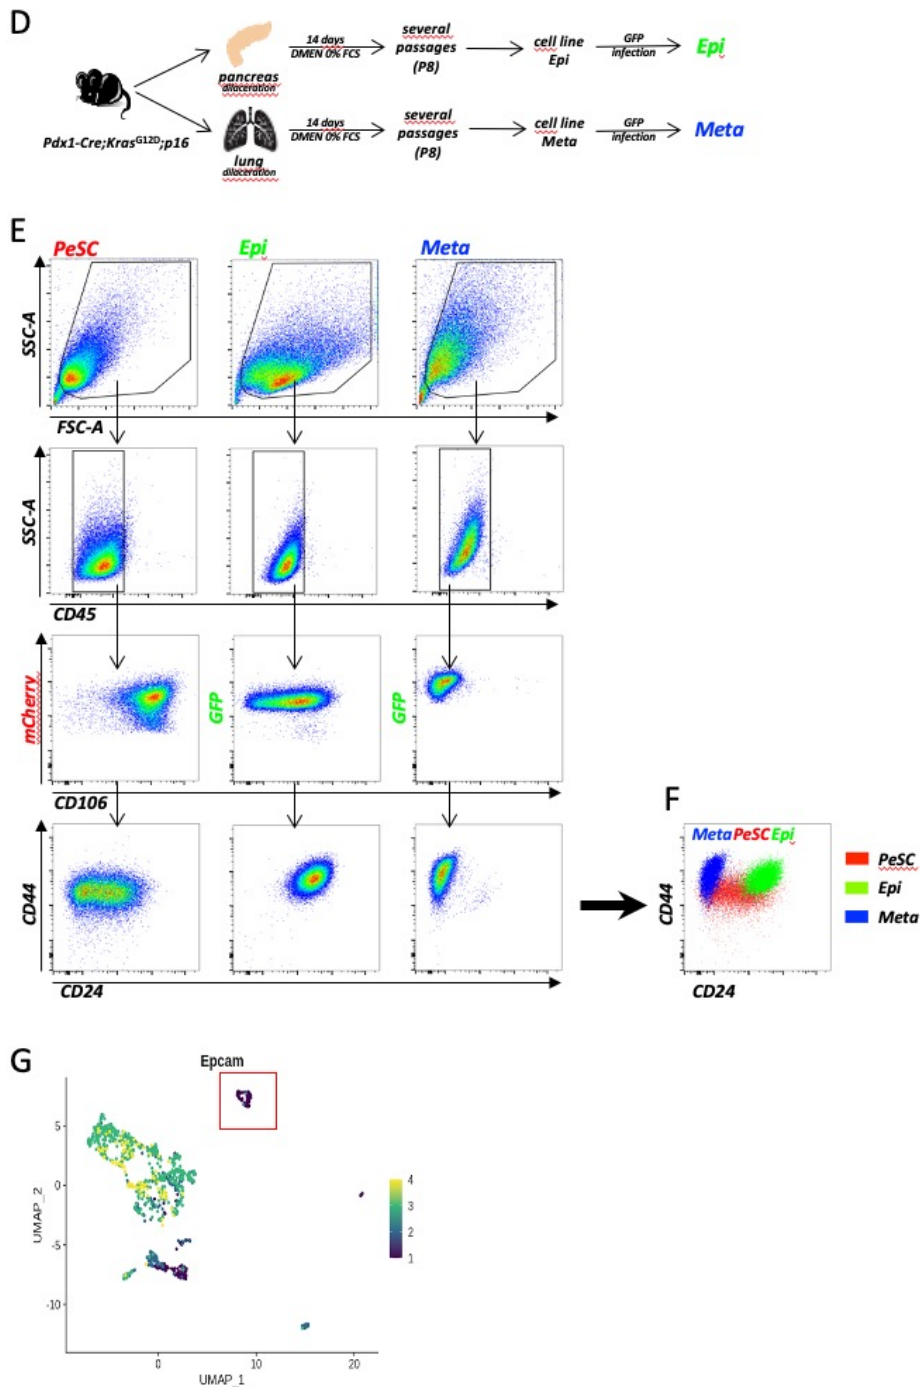

Appendix Figure S3: Generation of the PeSC line and its phenotype. (A) Gating strategy for the identification and kinetic phenotype-progression of the  $CD45^+EPCAM^+CD31^+CD106^+CD24^{low}CD44^{high}$  population after cell line generation at P0, P3, P5 and P20. The red arrows indicate morphologically similar PeSC population clusters. Scale bar, 100  $\mu$ m. (B) Representative IF staining of the PeSC cell line on coverslip at P20 for CD44 (green), CD24 (yellow), mCherry (red), DAPI (blue). Scale bar, 50  $\mu$ m. (C) Representative histogram analysis of PDGFR $\beta$ , PDGFR $\alpha$ , CD34, CD90, CD106, CD105, and CD146 by FACS staining in PeSCs. Generation of the Epi and Meta cell lines and their phenotypes. (D) Schematic representation of the experimental setting for Epi and Meta cell line generation. (E) Gating strategy for PeSCs, Epi cells and Meta cells based on CD45, mCherry/GFP, CD106, CD24 and CD44 staining. (F) Representative merged dot plots of PeSCs, Epi cells and Meta cells for CD24 and CD44 staining. (G) Single cell analysis UMAP plots shows that cluster 7 (PeSC fraction) had no expression of EPCAM.

# Appendix Figure S4

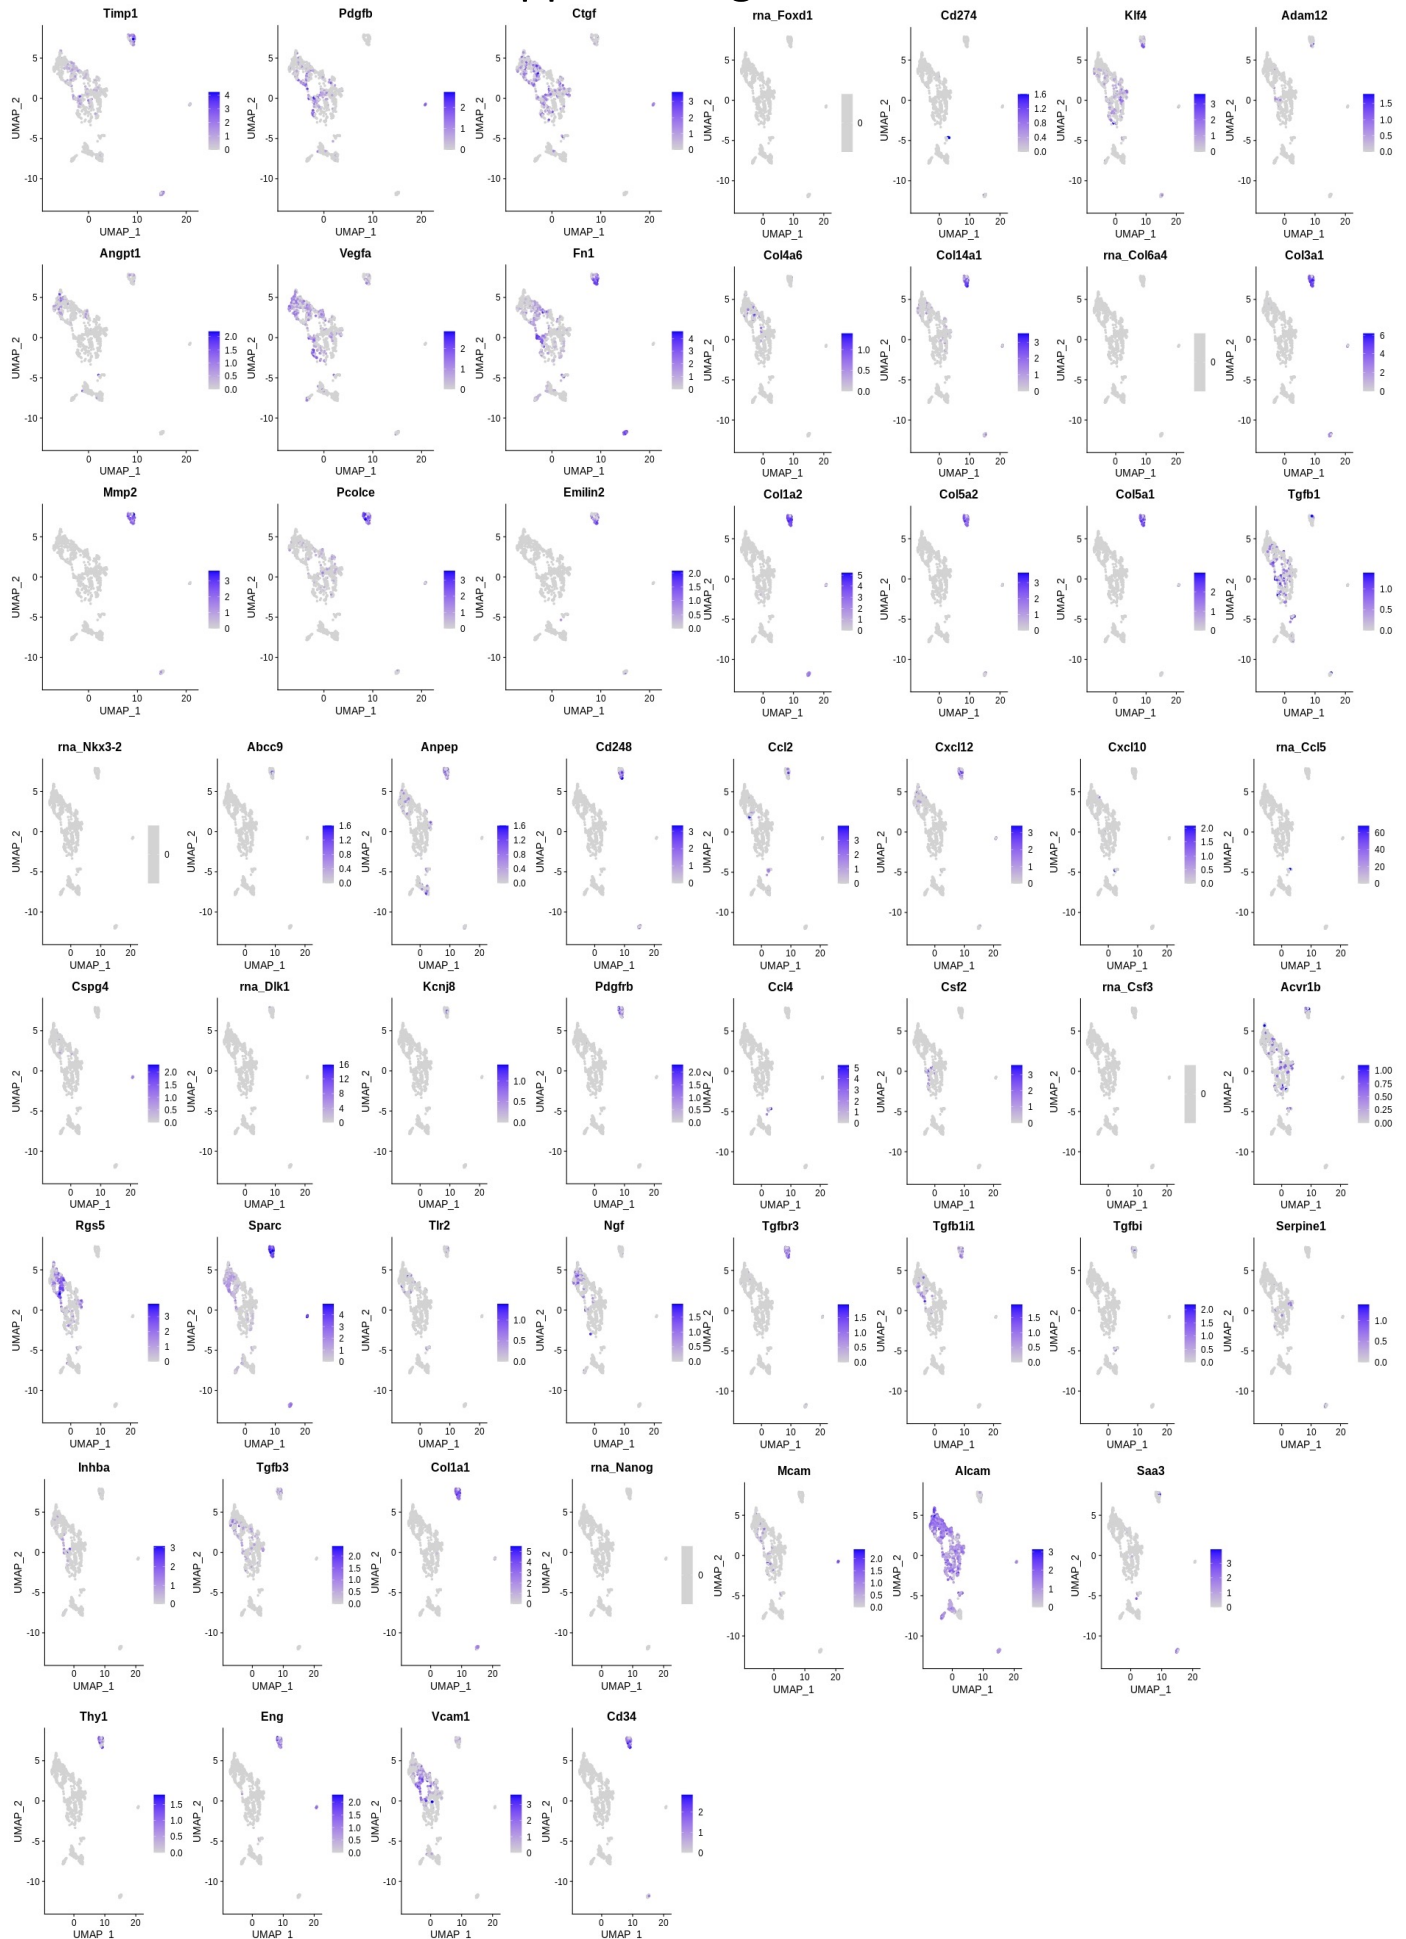

Appendix Figure S4: Single cell analysis reveals a distinct cluster 7 with PeSC signature. Single cell analysis UMAP plots of the PeSC signature genes extracted from the bulk RNAseq analysis and applied to the single cell analysis UMAP dots.

# Appendix Figure S5

A

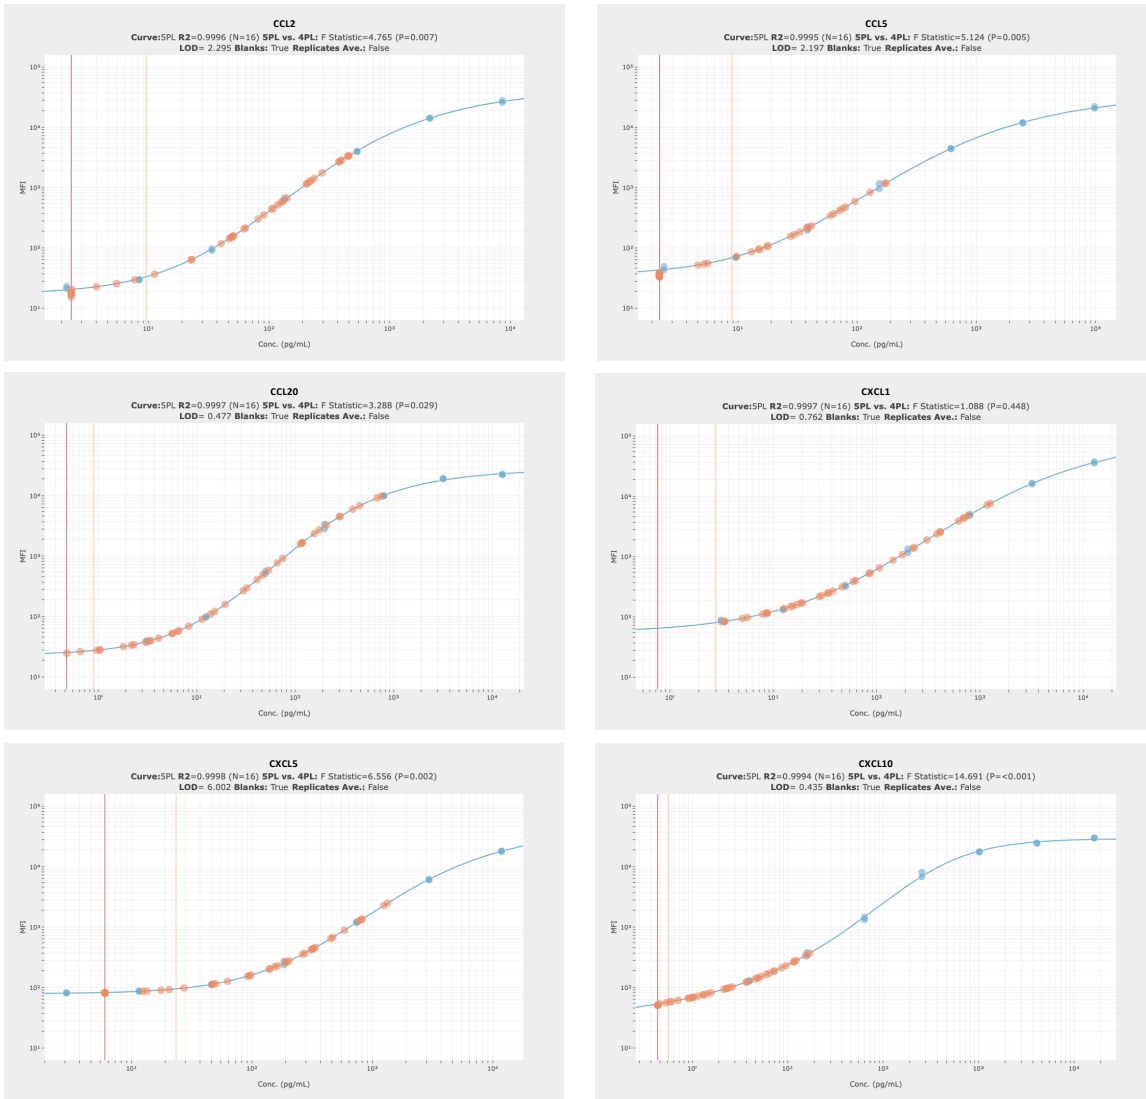

B

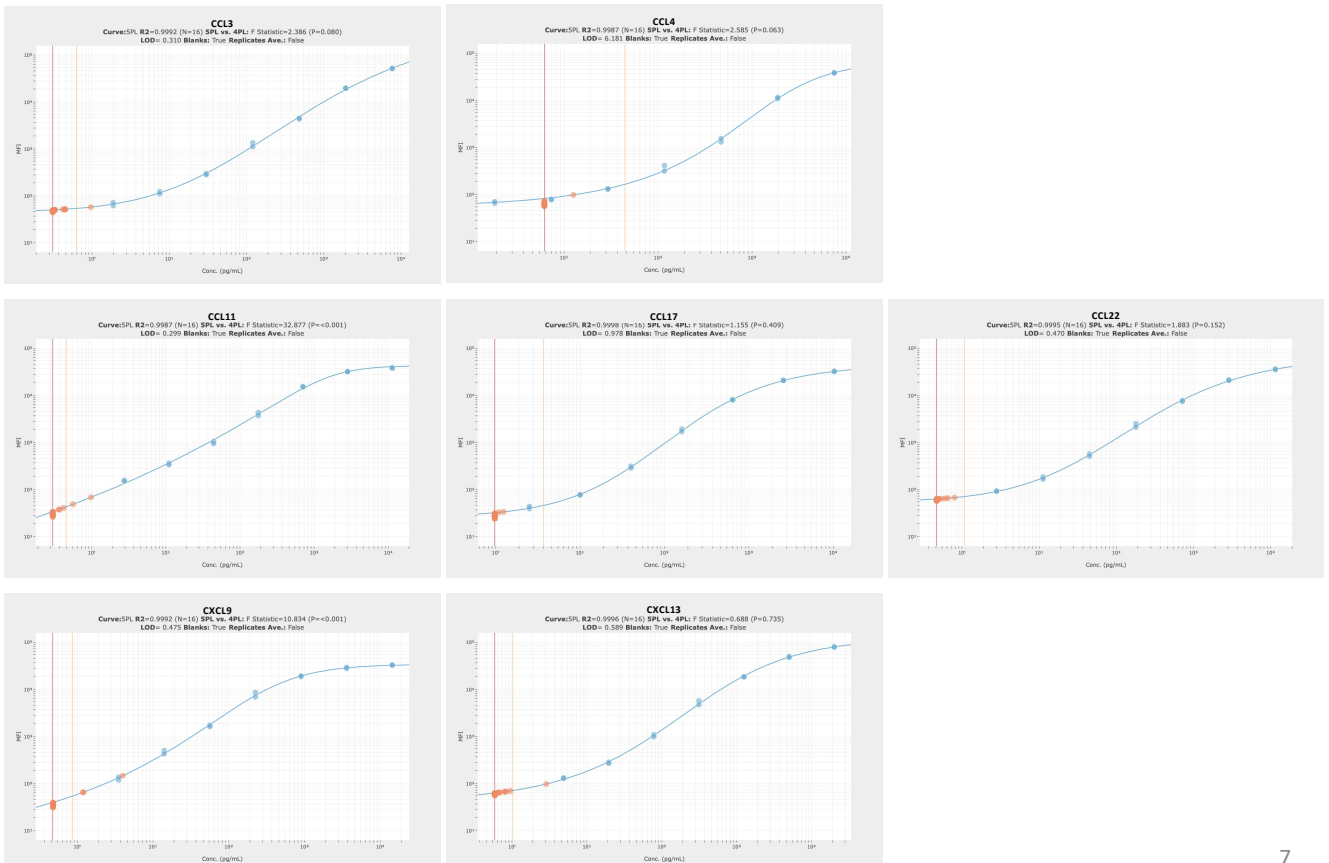

# Appendix Figure S5

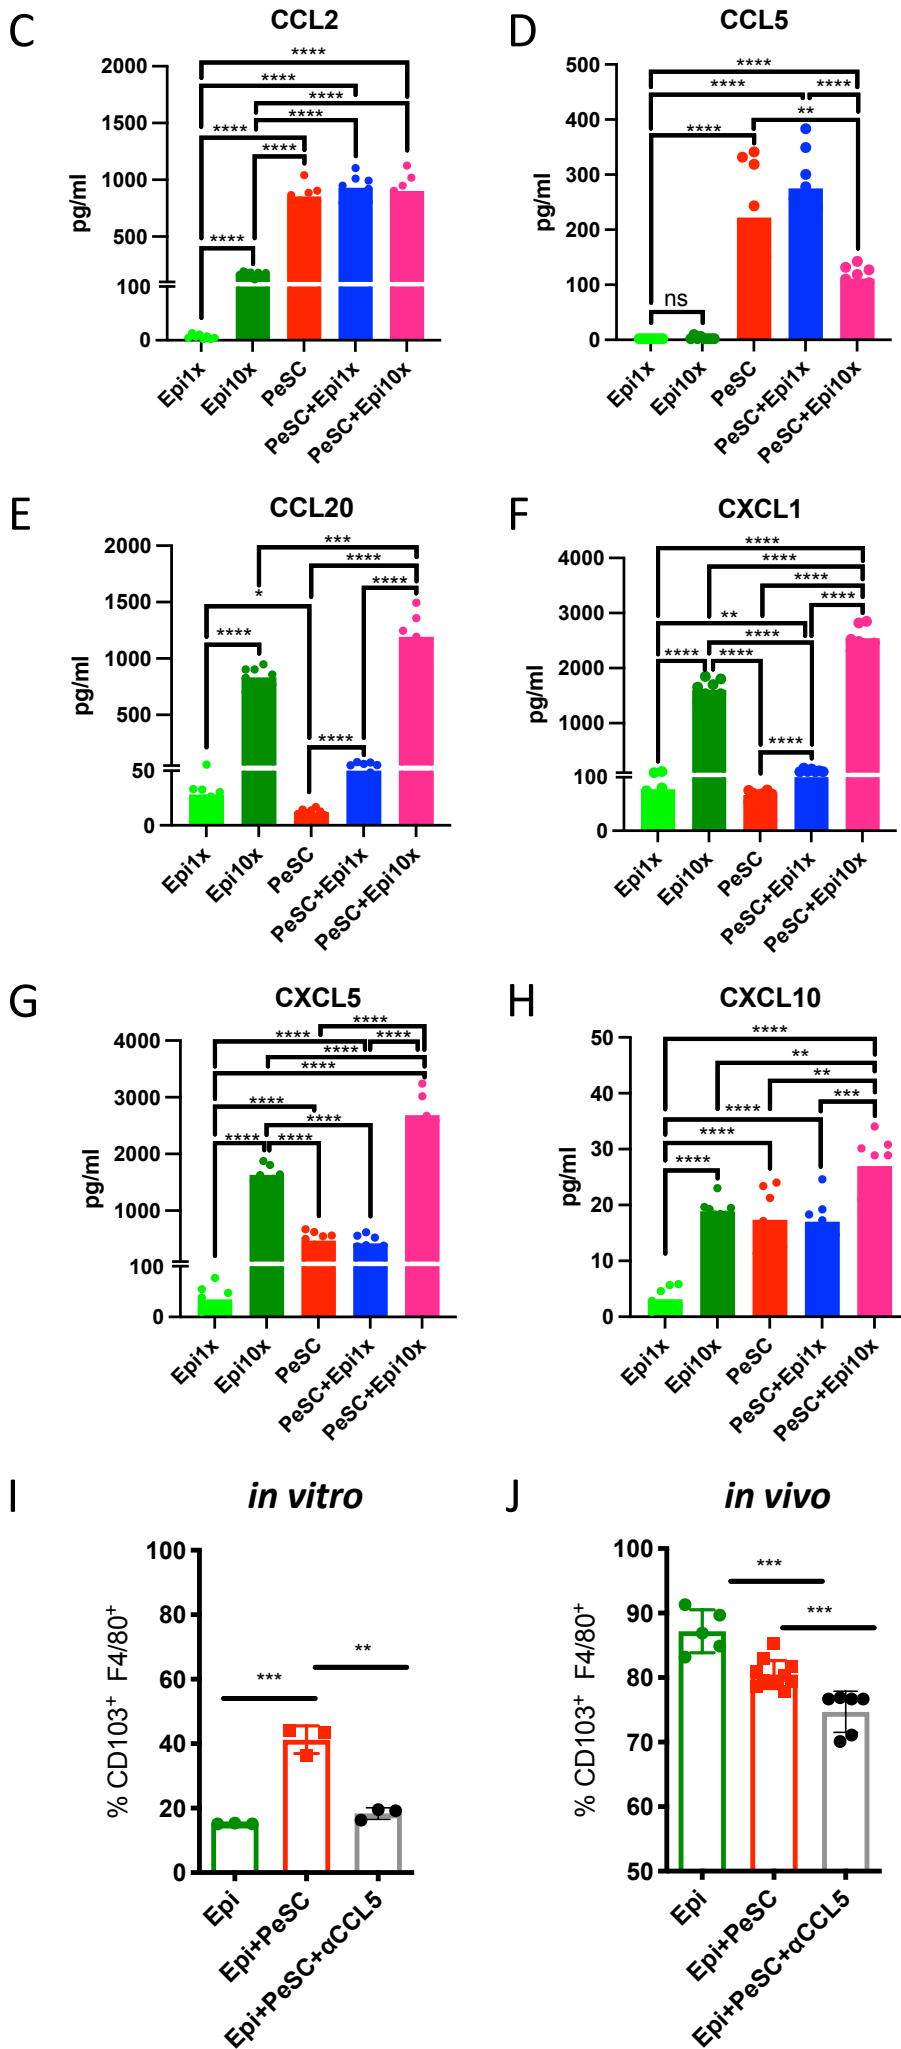



## Appendix Figure S5

Appendix Figure S5: Tumor-PeSC crosstalk affects the immune system. (A and B) The standard curve of each chemokine is derived from the LEGENDplex™ data analysis software (blue dots and curves). All non-zero standard curve points are displayed as blue dots on the graph. All logistic regression line derived by the curve fitting algorithm is performed by 5-parameter logistic regression (5PL), displaying on the graph as a solid blue line. The theoretical limit of detection (LOD) and limit of quantification (LOQ) are depicted as red and orange vertical lines, respectively. Chemokine CCL2, CCL5, CCL20, CXCL1, CXCL5, and CXCL10 can be detected from the cell culture supernatant in condition of Epi1x, Epi10x, PeSC, PeSC + Epi1x and PeSC + Epi10x, as showed by the orange dots in line with the curve which were mostly above the LOD and LOQ (A). Chemokine CCL3, CCL4, CCL11, CCL17, CCL22, CXCL19 and CXCL13 are not detected from the cell culture supernatant in condition of Epi1x, Epi10x, PeSC, PeSC + Epi1x and PeSC + Epi10x, as all the sample dots (orange) were below the LOD and LOQ (B). Quantification of chemokine CCL2 (C), CCL5 (D), CCL20 (E), CXCL1 (F), CXCL5 (G), and CXCL10 (H) detected from the cell culture supernatant in conditions of Epi1x, Epi10x, PeSC, PeSC + Epi1x and PeSC + Epi10x, respectively. The LEGENDplex assays have been performed twice. The displayed results are extracted from the second experiment. Biological duplicates were applied in each culture condition and the supernatant of each condition was then distributed into 4 different dilutions for FACS analysis quantified as technical replicates. (I) *In vitro* FACS analysis of the percentage of CD103<sup>+</sup>F4/80<sup>+</sup> cells among CD45<sup>+</sup> cells under the indicated culture conditions (biological triplicates in each condition). (J) *In vivo* FACS analysis of the percentage of CD103<sup>+</sup>F4/80<sup>+</sup> cells among CD45<sup>+</sup> cells under the indicated graft and treatment conditions. Each dot represents 1 grafted mouse, 5-6 mice in each group. \*\*P < 0.01, \*\*\*P < 0.001, \*\*\*\*P < 0.0001 The P-values were calculated using Student's t-test with GraphPad Prism.

## Appendix Figure S6

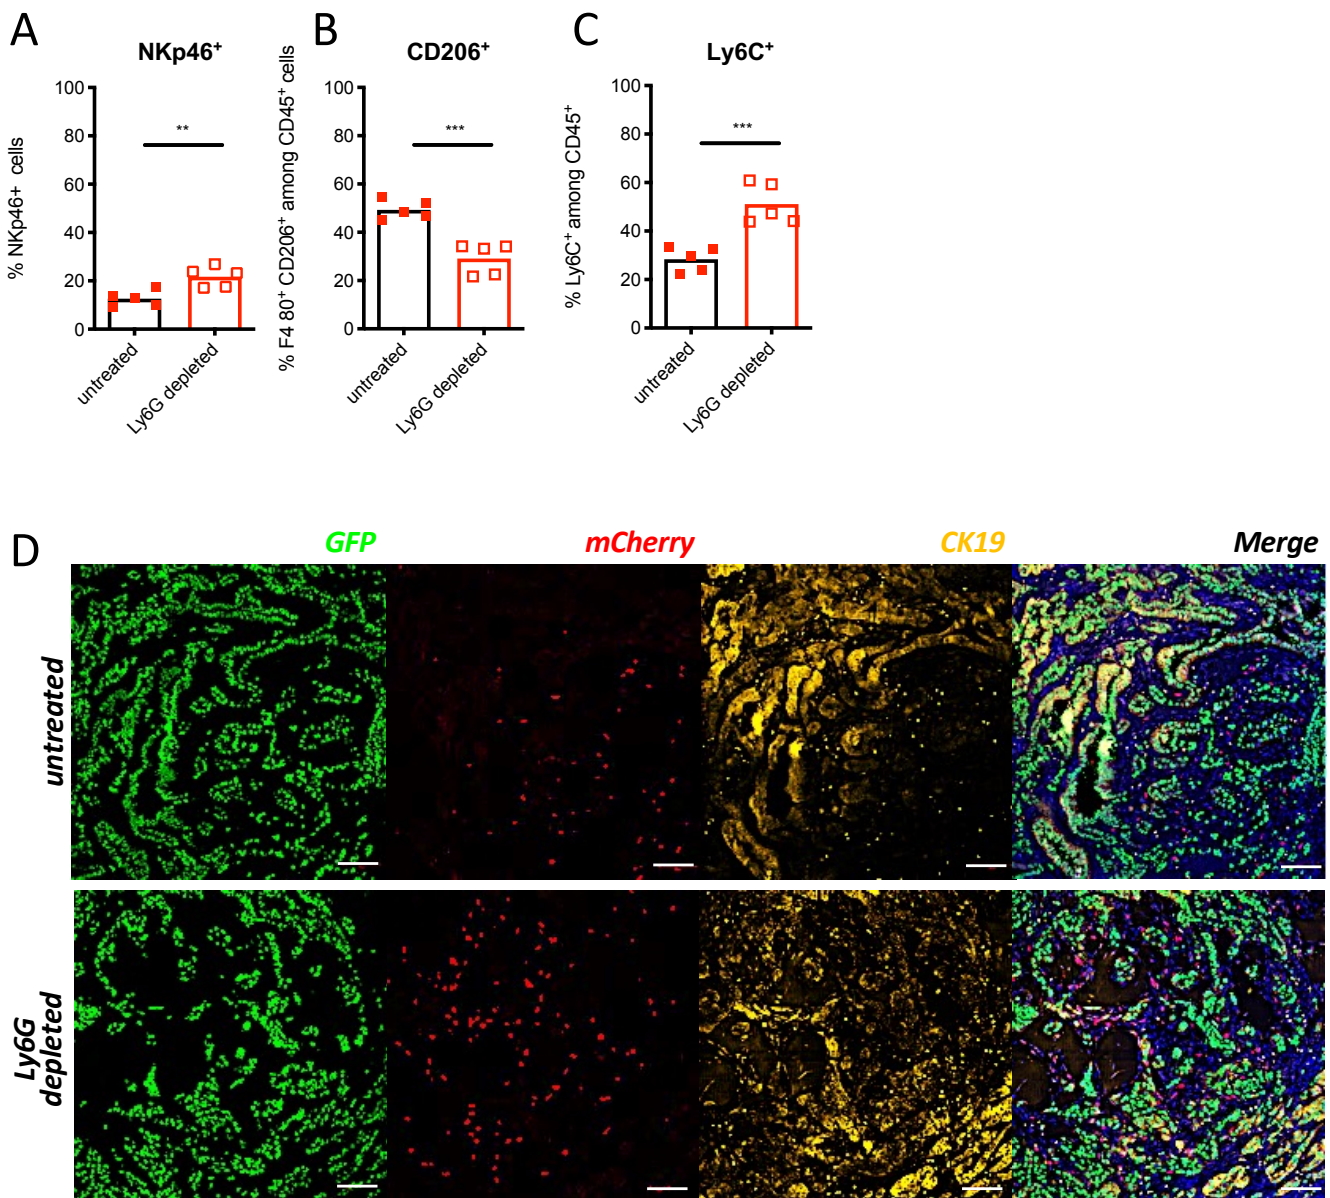

Appendix Figure S6: *In vivo* depletion of Ly6G<sup>+</sup> MDSCs diminishes tumor growth. FACS analysis of the percentage of NKp46<sup>+</sup> cells (A), CD206<sup>+</sup>F4/80<sup>+</sup> cells (B), and Ly6C<sup>+</sup> cells (C). \*\*P < 0.01 and \*\*\* P < 0.001. The P-values were calculated using Student's t-test with GraphPad Prism. (D) Representative IF staining of the implanted tumor graft in Rag2KO mouse for GFP (green), mCherry (red), CK19 (yellow) and DAPI (blue). Scale bar, 50μm. 8 mice in each group, 5 for FACS analysis and 3 for histological analysis. Each dot represents 1 mouse.

# Appendix Figure S7

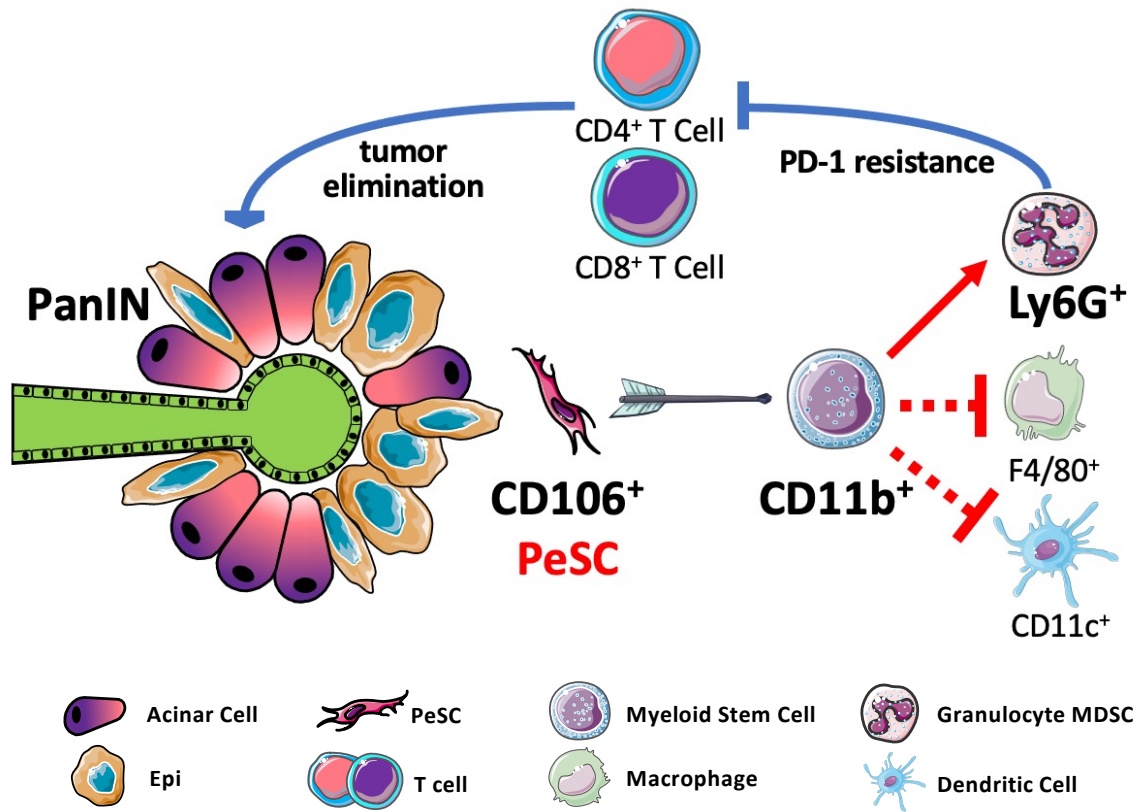

Appendix Figure S7: Interaction of CD106<sup>+</sup> PeSCs with CD11b<sup>+</sup> myeloid stem cells in the neoplastic microenvironment of PDAC

# Appendix Table S1

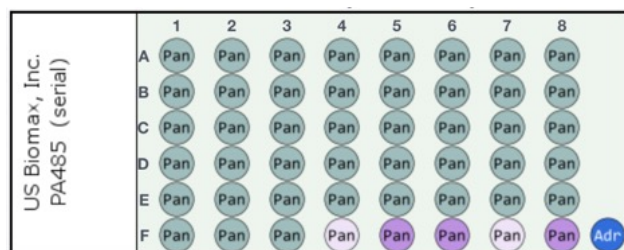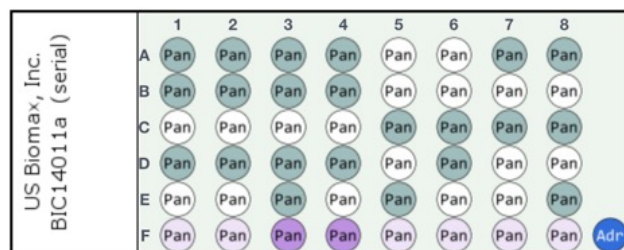

| No. | Age | Sex | Organ/<br>Anatomic<br>Site | Pathological<br>diagnosis | TNM    | Grade | Stage | Type |
|-----|-----|-----|----------------------------|---------------------------|--------|-------|-------|------|
| A1  | 68  | M   | Pancreas                   | AP                        | -      | -     | -     | Inf  |
| A2  | 47  | M   | Pancreas                   | AP                        | -      | -     | -     | Inf  |
| A3  | 60  | M   | Pancreas                   | AP                        | -      | -     | -     | Inf  |
| A4  | 44  | M   | Pancreas                   | CP                        | -      | -     | -     | Inf  |
| A5  | 49  | F   | Pancreas                   | CP                        | -      | -     | -     | Inf  |
| A6  | 62  | M   | Pancreas                   | CP                        | -      | -     | -     | Inf  |
| A7  | 40  | M   | Pancreas                   | CP                        | -      | -     | -     | Inf  |
| A8  | 51  | F   | Pancreas                   | CP                        | -      | -     | -     | Inf  |
| B1  | 58  | M   | Pancreas                   | CP                        | -      | -     | -     | Inf  |
| B2  | 47  | M   | Pancreas                   | CP                        | -      | -     | -     | Inf  |
| B3  | 51  | M   | Pancreas                   | RCP                       | -      | -     | -     | Inf  |
| B4  | 39  | M   | Pancreas                   | RCP                       | -      | -     | -     | Inf  |
| B5  | 59  | M   | Pancreas                   | RCP                       | -      | -     | -     | Inf  |
| B6  | 50  | F   | Pancreas                   | RCP                       | -      | -     | -     | Inf  |
| B7  | 51  | M   | Pancreas                   | RCP                       | -      | -     | -     | Inf  |
| B8  | 61  | M   | Pancreas                   | RCP                       | -      | -     | -     | Inf  |
| C1  | 51  | F   | Pancreas                   | RCP                       | -      | -     | -     | Inf  |
| C2  | 50  | F   | Pancreas                   | RCP                       | -      | -     | -     | Inf  |
| C3  | 67  | M   | Pancreas                   | RCP                       | -      | -     | -     | Inf  |
| C4  | 60  | M   | Pancreas                   | RCP                       | -      | -     | -     | Inf  |
| C5  | 67  | M   | Pancreas                   | RCP                       | -      | -     | -     | Inf  |
| C6  | 53  | F   | Pancreas                   | RCP                       | -      | -     | -     | Inf  |
| C7  | 33  | F   | Pancreas                   | RCP                       | -      | -     | -     | Inf  |
| C8  | 47  | F   | Pancreas                   | RCP                       | -      | -     | -     | Inf  |
| D1  | 57  | M   | Pancreas                   | RCP                       | -      | -     | -     | Inf  |
| D2  | 33  | F   | Pancreas                   | RCP                       | -      | -     | -     | Inf  |
| D3  | 49  | M   | Pancreas                   | RCP                       | -      | -     | -     | Inf  |
| D4  | 46  | F   | Pancreas                   | RCP                       | -      | -     | -     | Inf  |
| D5  | 59  | M   | Pancreas                   | RCP                       | -      | -     | -     | Inf  |
| D6  | 66  | F   | Pancreas                   | RCP                       | -      | -     | -     | Inf  |
| D7  | 66  | F   | Pancreas                   | RCP                       | -      | -     | -     | Inf  |
| D8  | 65  | F   | Pancreas                   | RCP                       | -      | -     | -     | Inf  |
| E1  | 55  | M   | Pancreas                   | RCP                       | -      | -     | -     | Inf  |
| E2  | 76  | M   | Pancreas                   | RCP                       | -      | -     | -     | Inf  |
| E3  | 35  | F   | Pancreas                   | RCP                       | -      | -     | -     | Inf  |
| E4  | 60  | M   | Pancreas                   | RCP                       | -      | -     | -     | Inf  |
| E5  | 49  | M   | Pancreas                   | RCP                       | -      | -     | -     | Inf  |
| E6  | 47  | F   | Pancreas                   | RCP                       | -      | -     | -     | Inf  |
| E7  | 61  | M   | Pancreas                   | RCP                       | -      | -     | -     | Inf  |
| E8  | 76  | F   | Pancreas                   | RCP                       | -      | -     | -     | Inf  |
| F1  | 53  | M   | Pancreas                   | RCP                       | -      | -     | -     | Inf  |
| F2  | 55  | F   | Pancreas                   | RCP                       | -      | -     | -     | Inf  |
| F3  | 68  | M   | Pancreas                   | RCP                       | -      | -     | -     | Inf  |
| F4  | 60  | M   | Pancreas                   | PDAC                      | T2N0M0 | 2     | IB    | Mal  |
| F5  | 49  | M   | Pancreas                   | PDAC                      | T3N0M0 | 3     | II    | Mal  |
| F6  | 47  | F   | Pancreas                   | PDAC                      | T2N0M0 | 2     | IIB   | Mal  |
| F7  | 61  | M   | Pancreas                   | PDAC                      | T2N0M0 | 2     | IB    | Mal  |
| F8  | 76  | F   | Pancreas                   | PDAC                      | T3N0M0 | 1     | I     | Mal  |
| -   | 42  | M   | Adrenal<br>gland           | PCC                       | -      | -     | -     | Mal  |

**AP** = Acute Pancreatitis  
**CP** = Chronic Pancreatitis  
**RCP** = Reactive Chronic Pancreatitis  
**PCC** = Pheochromocytoma  
**Inf** = Inflammation  
**Mal** = Malignant

<https://www.biomax.us/tissue-arrays/pancreas/PA485>

| No. | Age | Sex | Organ/<br>Anatomic<br>Site | Pathologica<br>l diagnosis | TMN    | Grade | Stage | Type  |
|-----|-----|-----|----------------------------|----------------------------|--------|-------|-------|-------|
| A1  | 42  | M   | Pancreas                   | CP                         | -      | -     | -     | Inf   |
| A2  | 42  | M   | Pancreas                   | CP                         | -      | -     | -     | Inf   |
| A3  | 50  | F   | Pancreas                   | CP                         | -      | -     | -     | Inf   |
| A4  | 50  | F   | Pancreas                   | CP                         | -      | -     | -     | Inf   |
| A5  | 66  | F   | Pancreas                   | PanIN2                     | -      | -     | -     | PanIN |
| A6  | 66  | F   | Pancreas                   | PanIN2                     | -      | -     | -     | PanIN |
| A7  | 70  | F   | Pancreas                   | CP                         | -      | -     | -     | Inf   |
| A8  | 70  | F   | Pancreas                   | CP                         | -      | -     | -     | Inf   |
| B1  | 51  | M   | Pancreas                   | CP                         | -      | -     | -     | Inf   |
| B2  | 51  | M   | Pancreas                   | CP                         | -      | -     | -     | Inf   |
| B3  | 57  | M   | Pancreas                   | CP                         | -      | -     | -     | Inf   |
| B4  | 57  | M   | Pancreas                   | CP                         | -      | -     | -     | Inf   |
| B5  | 33  | F   | Pancreas                   | PanIN1                     | -      | -     | -     | PanIN |
| B6  | 33  | F   | Pancreas                   | PanIN1                     | -      | -     | -     | PanIN |
| B7  | 44  | M   | Pancreas                   | PanIN1                     | -      | -     | -     | PanIN |
| B8  | 44  | M   | Pancreas                   | PanIN1                     | -      | -     | -     | PanIN |
| C1  | 53  | M   | Pancreas                   | PanIN1                     | -      | -     | -     | PanIN |
| C2  | 53  | M   | Pancreas                   | PanIN1                     | -      | -     | -     | PanIN |
| C3  | 51  | F   | Pancreas                   | PanIN1                     | -      | -     | -     | PanIN |
| C4  | 51  | F   | Pancreas                   | PanIN1                     | -      | -     | -     | PanIN |
| C5  | 51  | M   | Pancreas                   | CP                         | -      | -     | -     | Inf   |
| C6  | 51  | M   | Pancreas                   | CP                         | -      | -     | -     | Inf   |
| C7  | 55  | F   | Pancreas                   | CP                         | -      | -     | -     | Inf   |
| C8  | 55  | F   | Pancreas                   | CP                         | -      | -     | -     | Inf   |
| D1  | 53  | M   | Pancreas                   | CP                         | -      | -     | -     | Inf   |
| D2  | 53  | M   | Pancreas                   | CP                         | -      | -     | -     | Inf   |
| D3  | 67  | M   | Pancreas                   | CP                         | -      | -     | -     | Inf   |
| D4  | 67  | M   | Pancreas                   | CP                         | -      | -     | -     | Inf   |
| D5  | 73  | F   | Pancreas                   | PanIN1                     | -      | -     | -     | PanIN |
| D6  | 73  | F   | Pancreas                   | CP                         | -      | -     | -     | Inf   |
| D7  | 65  | M   | Pancreas                   | PanIN2                     | -      | -     | -     | PanIN |
| D8  | 65  | M   | Pancreas                   | PanIN2                     | -      | -     | -     | PanIN |
| E1  | 64  | M   | Pancreas                   | PanIN2                     | -      | -     | -     | PanIN |
| E2  | 64  | M   | Pancreas                   | PanIN2                     | -      | -     | -     | PanIN |
| E3  | 76  | M   | Pancreas                   | CP                         | -      | -     | -     | Inf   |
| E4  | 76  | M   | Pancreas                   | PanIN1                     | -      | -     | -     | PanIN |
| E5  | 15  | F   | Pancreas                   | CP                         | -      | -     | -     | Inf   |
| E6  | 15  | F   | Pancreas                   | PanIN2                     | -      | -     | -     | PanIN |
| E7  | 55  | F   | Pancreas                   | PanIN2                     | -      | -     | -     | PanIN |
| E8  | 55  | F   | Pancreas                   | CP                         | -      | -     | -     | Inf   |
| F1  | 54  | F   | Pancreas                   | PDAC                       | T2N0M0 | 1     | I     | Mal   |
| F2  | 54  | F   | Pancreas                   | PDAC                       | T2N0M0 | 1     | I     | Mal   |
| F3  | 51  | M   | Pancreas                   | PDAC                       | T3N1M0 | 1     | IIB   | Mal   |
| F4  | 51  | M   | Pancreas                   | PDAC                       | T3N1M0 | 1     | IIB   | Mal   |
| F5  | 68  | F   | Pancreas                   | PDAC                       | T2N0M0 | 2     | IB    | Mal   |
| F6  | 68  | F   | Pancreas                   | PDAC                       | T2N0M0 | 2     | IB    | Mal   |
| F7  | 55  | F   | Pancreas                   | PDAC                       | T2N0M0 | 2     | IB    | Mal   |
| F8  | 55  | F   | Pancreas                   | PDAC                       | T2N0M0 | -     | IB    | Mal   |
| -   | 42  | M   | Adrenal<br>gland           | PCC                        | -      | -     | -     | Mal   |

**PanIN** = Pancreatic Intraepithelial Neoplasia  
**PDAC** = Pancreatic Duct Adenocarcinoma

<https://www.biomax.us/tissue-arrays/pancreas/BIC14011a>

## Appendix Table S1: TMA characteristics.
