# Supplementary material for: Pericyte stem cells induce Ly6G + cell accumulation and immunotherapy resistance in pancreatic cancer
Source: PubMed Central journal article supplement — EMBO Rep. 2023 Feb 21;24(4):e56524. doi: 10.15252/embr.202256524 (PMC10074138; doi:10.15252/embr.202256524), 2023-02-21
Supplement: EMBR-24-e56524-s008.pdf [file EMBR-24-e56524-s008.pdf]

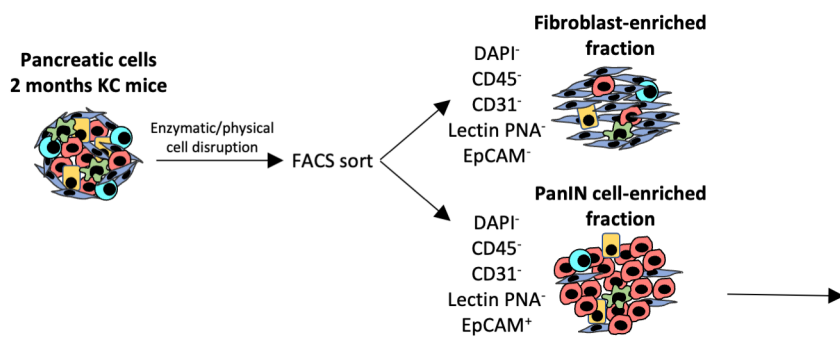

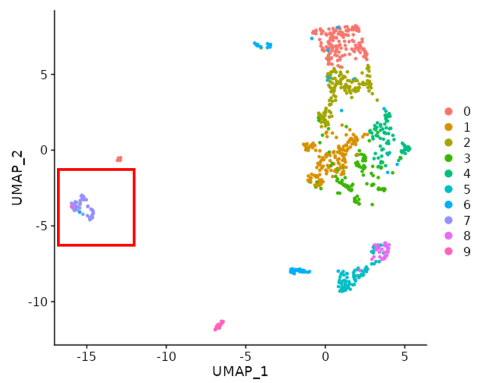

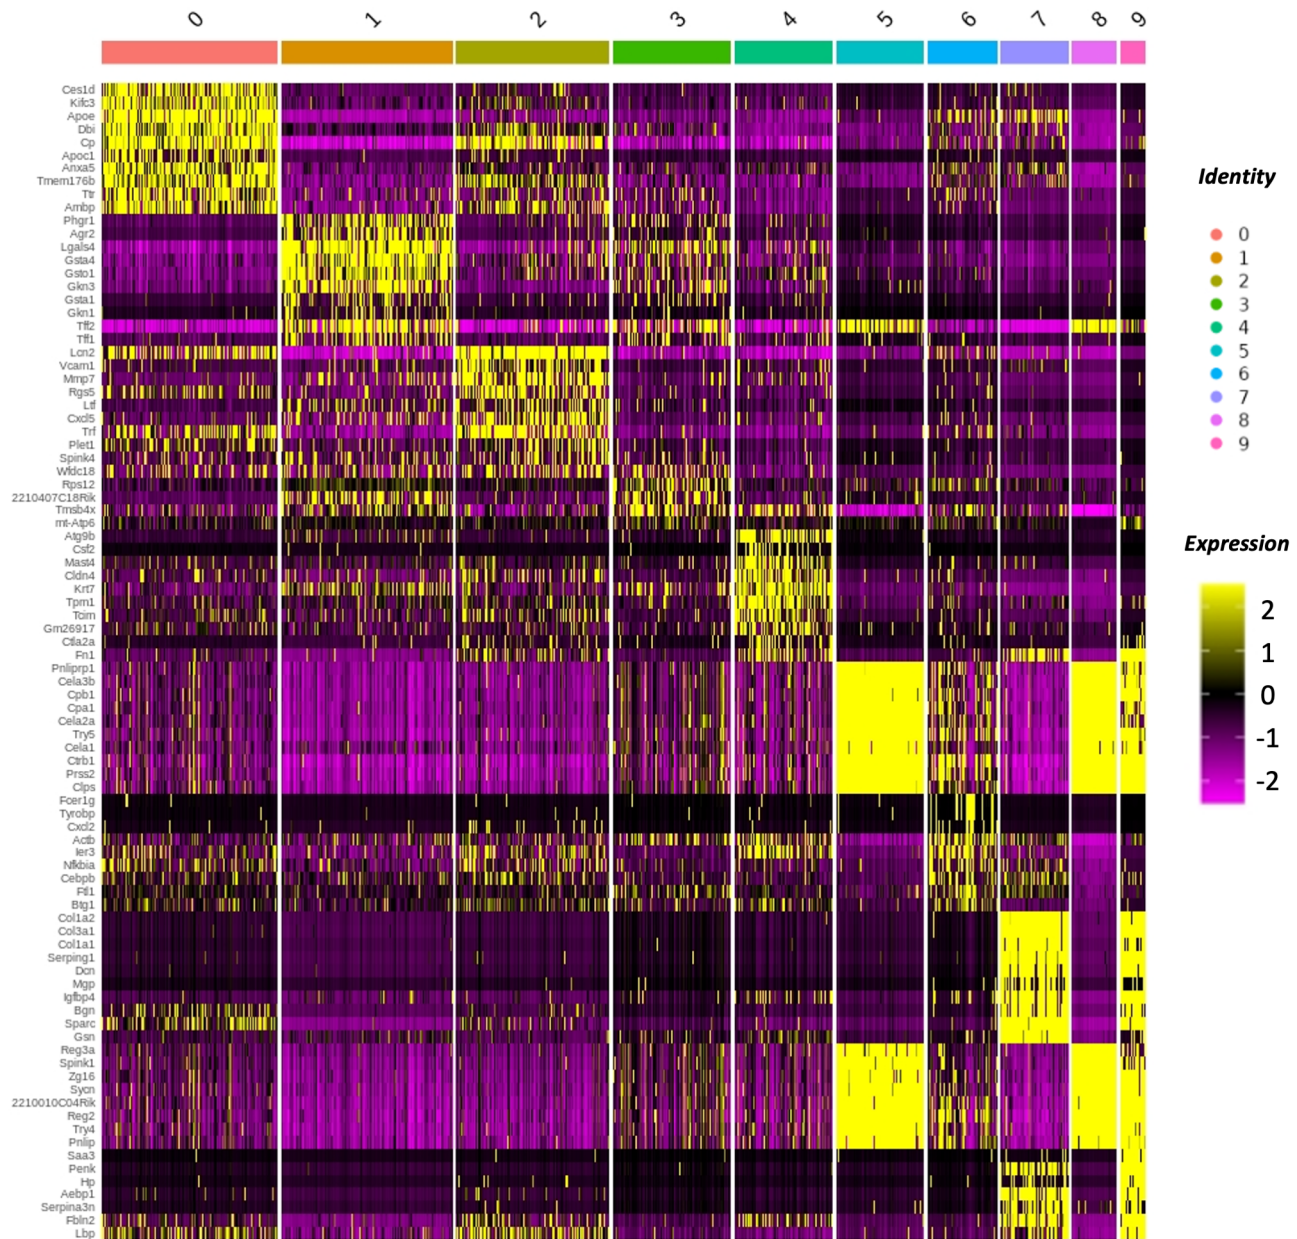

| Pathways                                              | Overlap | P value                | Genes                                                                                                                                                                                                                                                                           |
|-------------------------------------------------------|---------|------------------------|---------------------------------------------------------------------------------------------------------------------------------------------------------------------------------------------------------------------------------------------------------------------------------|
| <b>Focal Adhesion</b>                                 | 34/185  | 4.7155E <sup>-12</sup> | ITGB1;TNXB;ITGB5;LAMA2;SHC1;LAMA4;PIK3R1;LAMC1;THBS2;EGFR;MYLK;THBS3;CCND3;AKT2;FYN;PDGFRB;PDGFRA;LAMB2;FN1;VEGFD;LAMB1;IGF1;COL1A1;COL3A1;COL1A2;COL4A2;COL5A1;COL4A1;COL5A3;COL6A2;SELENOP;COL5A2;ITGA5;TLN1                                                                  |
| <b>Focal Adhesion-PI3K-Akt-mTOR-signaling pathway</b> | 45/324  | 4.3453E <sup>-11</sup> | ITGB1;TNXB;CSF1;ITGB5;LAMA2;EPAS1;LAMA4;LPAR1;PIK3R1;LPAR4;LAMC1;THBS2;FGF2;EGFR;HSP90B1;THBS3;CREB3L1;AKT2;JAK1;PDGFRB;IFNAR2;PDGFRA;LAMB2;F2R;FN1;VEGFD;LAMB1;IGF1;OSMR;GNG11;COL1A1;COL3A1;COL1A2;COL4A2;COL5A1;COL4A1;COL5A3;COL6A2;COL5A2;IL3RA;GNB4;ITGA5;TEK;FGFR1;CREB5 |
| <b>ESC Pluripotency Pathways</b>                      | 17/118  | 3.0489E <sup>-05</sup> | PDGFRB;FZD1;PDGFRA;FZD2;BMPR2;FZD4;WNT5A;STAT3;LIFR;FGF2;EGFR;BMP4;AKT2;SELENOP;IL6ST;FGFR1;JAK1                                                                                                                                                                                |
| <b>Endochondral Ossification</b>                      | 17/62   | 1.8466E <sup>-09</sup> | CDKN1C;TGFB2;THRA;PLAT;PTH1R;IGF1;FGF2;GLI3;ADAMTS5;CTSL;PLAU;ADAMTS1;MGP;SERPINH1;TIMP3;DDR2;FGFR1                                                                                                                                                                             |
| <b>Adipogenesis genes</b>                             | 25/134  | 2.2782E <sup>-09</sup> | CEBPB;CEBPD;EPAS1;LPL;TWIST1;RORA;NR3C1;NAMPT;NDN;SCD1;FZD1;GDF10;WWTR1;MBNL1;PTGIS;STAT3;EBF1;LIFR;NSG1;IGF1;BMP4;SFRP4;BMP1;ID3;IL6ST                                                                                                                                         |
| <b>Complement and Coagulation Cascades</b>            | 15/62   | 1.0391E <sup>-07</sup> | C1RA;CFH;PROS1;F2R;PLAT;TFPI;C2;C4B;C3;THBD;C1S1;PLAU;SERPING1;CFB;CD55                                                                                                                                                                                                         |
| <b>Inflammatory Response Pathway</b>                  | 9/30    | 5.5808E <sup>-06</sup> | COL1A1;COL3A1;COL1A2;LAMB2;FN1;LAMB1;LAMC1;THBS3;TNFRSF1A                                                                                                                                                                                                                       |
| <b>TGFβ Signaling Pathway</b>                         | 11/52   | 2.0840E <sup>-05</sup> | TGFBR3;SKI;BMP4;ZEB2;FST;STAT3;LTBP1;TGFB1;JAK1;TGFB2;ENG                                                                                                                                                                                                                       |
| <b>Matrix Metalloproteinases</b>                      | 7/29    | 2.8412E <sup>-04</sup> | MMP23;MMP14;MMP2;TIMP2;TIMP3;MMP19;TIMP1                                                                                                                                                                                                                                        |
