# Supplementary material for: Pericyte stem cells induce Ly6G + cell accumulation and immunotherapy resistance in pancreatic cancer
Source: PubMed Central journal article supplement — EMBO Rep. 2023 Feb 21;24(4):e56524. doi: 10.15252/embr.202256524 (PMC10074138; doi:10.15252/embr.202256524), 2023-02-21
Supplement: EMBR-24-e56524-s009.pdf [file EMBR-24-e56524-s009.pdf]

|  | Group A | Group B  |
|----------------------------------------------------------------------------------|---------|----------|
|                                                                                  | Epi     | Epi+PeSC |
|                                                                                  | Y       | Y        |
| 1                                                                                | 0.1249  | 0.1300   |
| 2                                                                                | 0.2017  | 0.1880   |
| 3                                                                                | 0.0903  | 0.3075   |
| 4                                                                                | 0.1256  | 0.2509   |
| 5                                                                                | 0.1812  | 0.1222   |
| 6                                                                                | 0.0972  | 0.1378   |
| 7                                                                                | 0.1392  | 0.1915   |
| 8                                                                                | 0.0958  | 0.1398   |
| 9                                                                                | 0.1597  | 0.1157   |
| 10                                                                               | 0.0949  | 0.1627   |
| 11                                                                               | 0.1541  | 0.1859   |
| 12                                                                               | 0.1199  | 0.1288   |
| 13                                                                               | 0.1622  | 0.2383   |
| 14                                                                               | 0.1691  | 0.2113   |

|  | Group A    | Group B         | Group C       | Group D            |
|----------------------------------------------------------------------------------|------------|-----------------|---------------|--------------------|
|                                                                                  | Epi+Iso Ab | Epi+PeSC+Iso Ab | Epi αPD-1 mAb | Epi+PeSC αPD-1 mAb |
|                                                                                  | Y          | Y               | Y             | Y                  |
| 1                                                                                | 0.0587     | 0.0874          | 0.0716        | 0.0744             |
| 2                                                                                | 0.0730     | 0.0803          | 0.0597        | 0.0713             |
| 3                                                                                | 0.0725     | 0.0696          | 0.0510        | 0.0746             |
| 4                                                                                | 0.0731     | 0.0760          | 0.0589        | 0.0830             |
| 5                                                                                | 0.0666     | 0.0713          | 0.0517        | 0.0664             |
| 6                                                                                | 0.0596     | 0.0702          | 0.0633        | 0.0868             |
| 7                                                                                | 0.0777     | 0.0803          | 0.0569        | 0.0800             |
| 8                                                                                | 0.0643     | 0.0735          | 0.0567        | 0.0711             |
| 9                                                                                | 0.0650     | 0.0707          | 0.0538        | 0.0717             |
| 10                                                                               | 0.0720     | 0.0889          | 0.0670        | 0.0813             |
| 11                                                                               | 0.0694     | 0.0788          |               |                    |
| 12                                                                               | 0.0600     | 0.0680          |               |                    |
