# Supplementary figures and images for: Pericyte stem cells induce Ly6G + cell accumulation and immunotherapy resistance in pancreatic cancer
Source: PubMed Central journal article supplement — EMBO Rep. 2023 Feb 21;24(4):e56524. doi: 10.15252/embr.202256524 (PMC10074138; doi:10.15252/embr.202256524), 2023-02-21

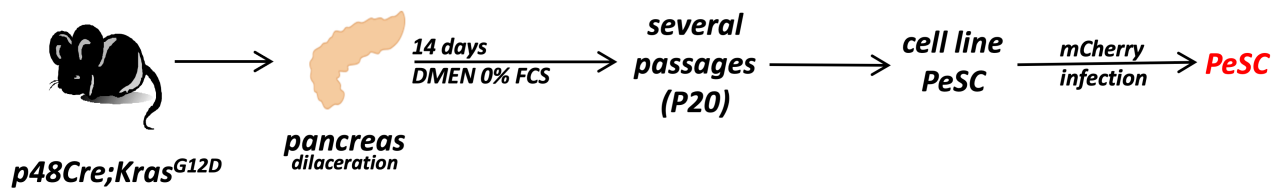

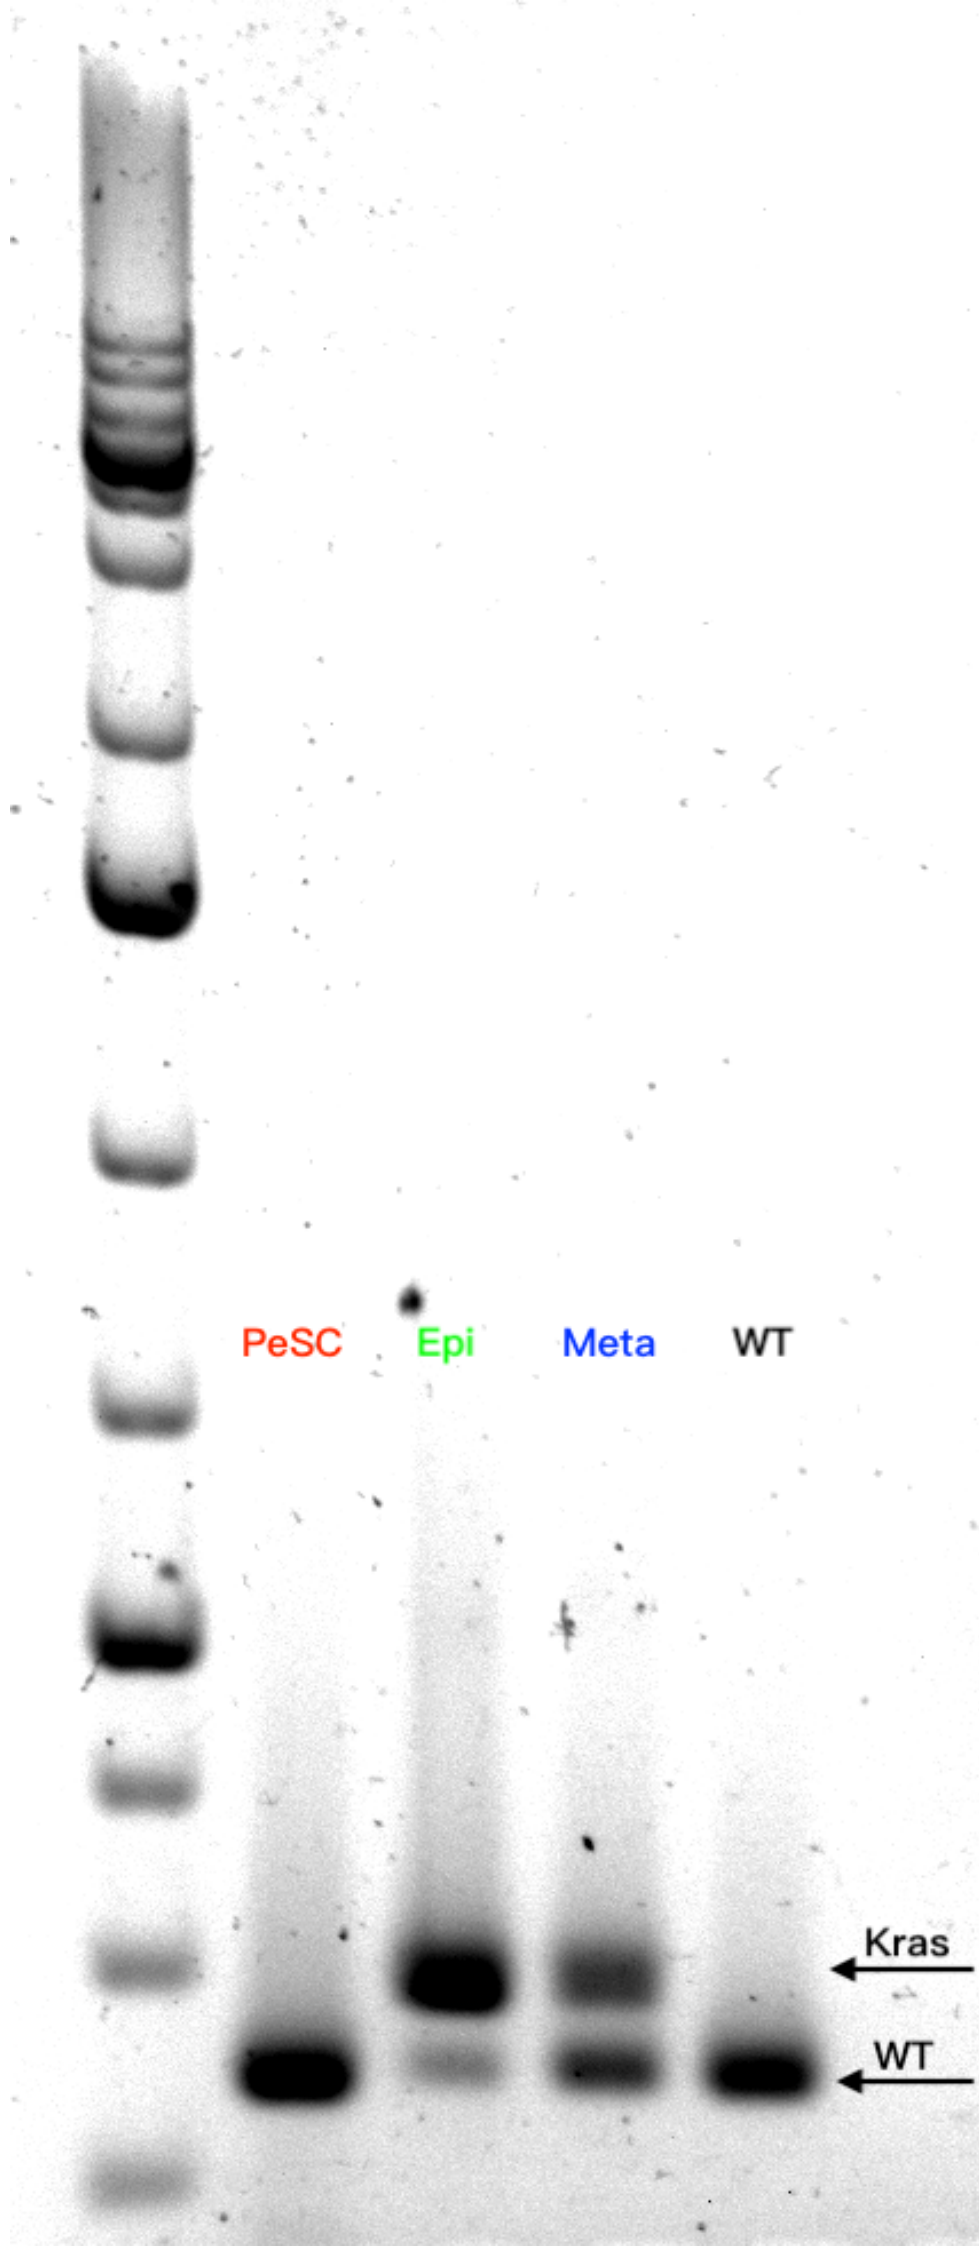

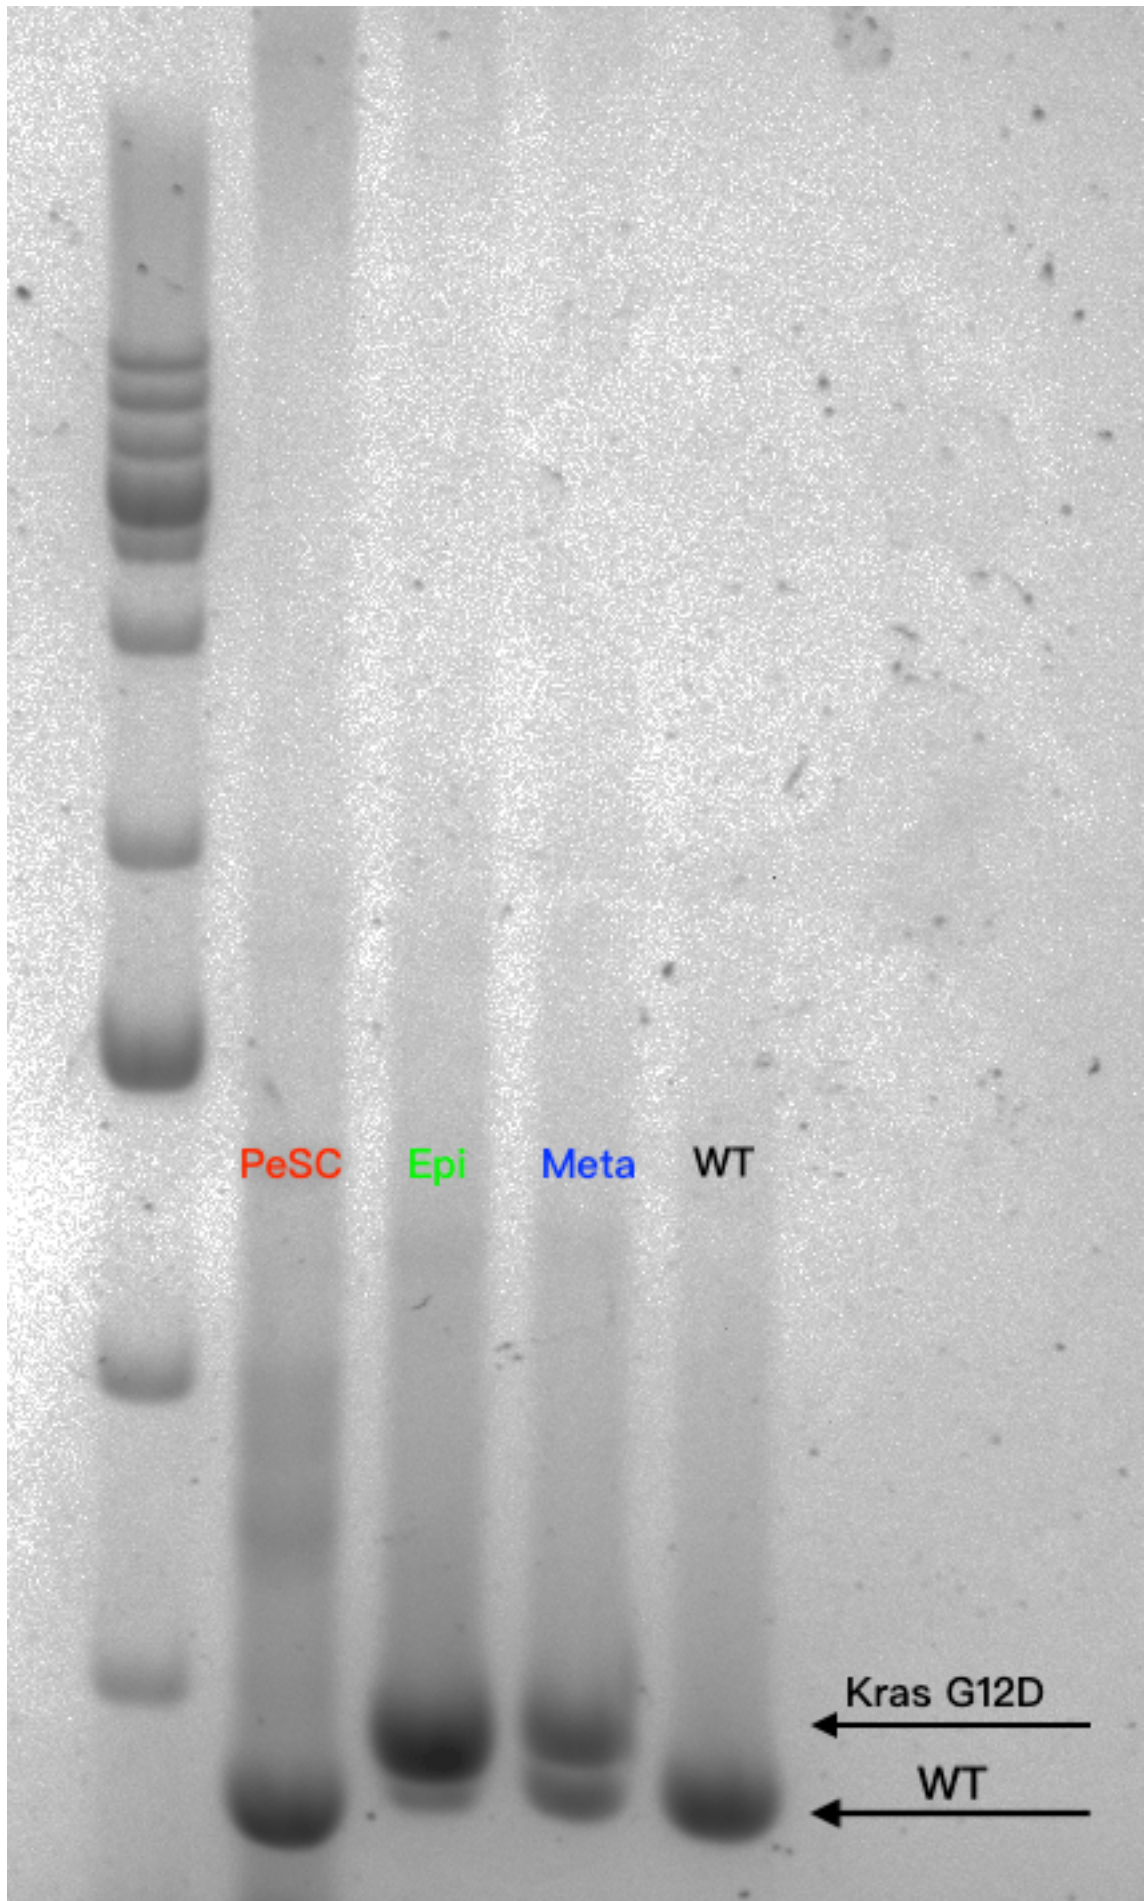

09/04/2021

Tubulin/G12D

KC1 KC2 Ep:Ep: PASC  
4

170  
130  
100  
70  
55  
40  
35  
25  
15  
10

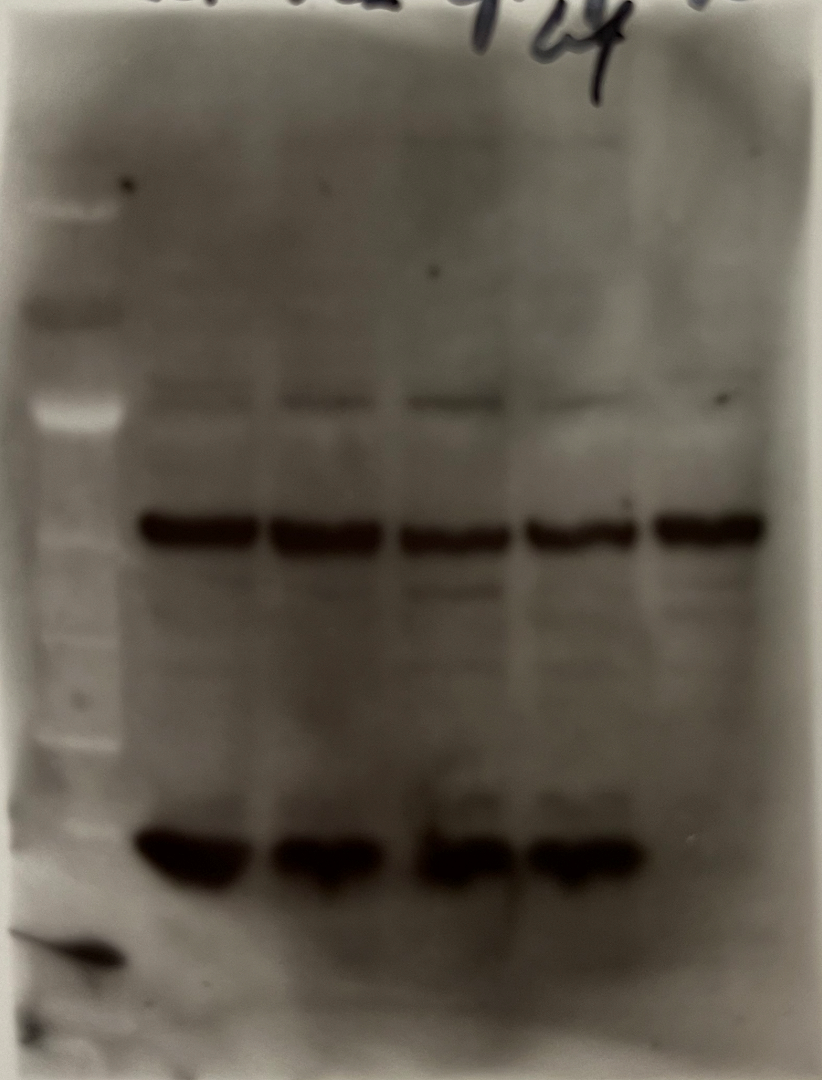

Handwritten signature or initials.

Supplement: EMBR-24-e56524-s001.pdf [file EMBR-24-e56524-s001.pdf]

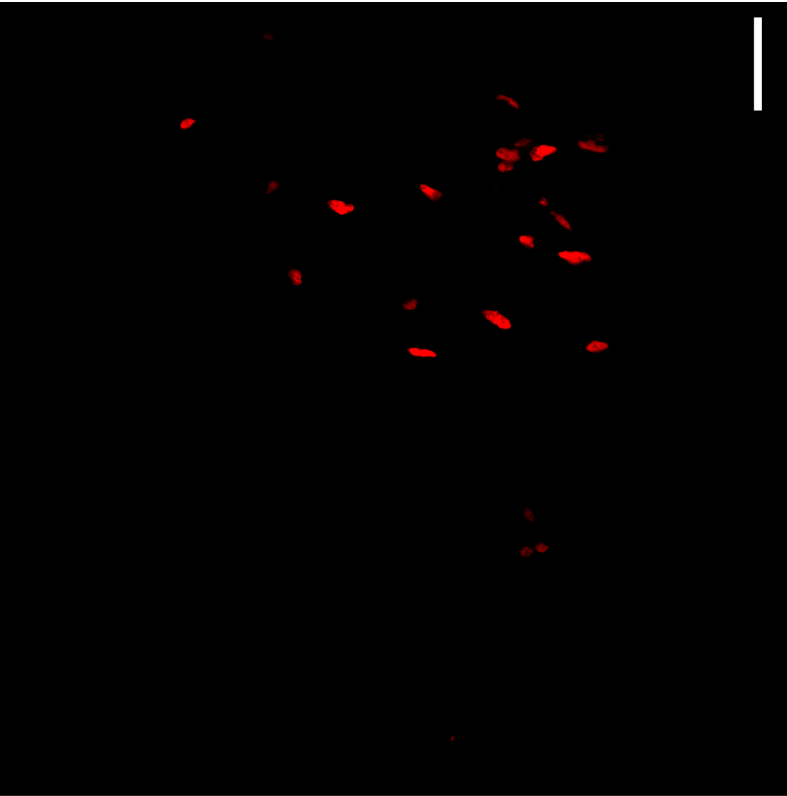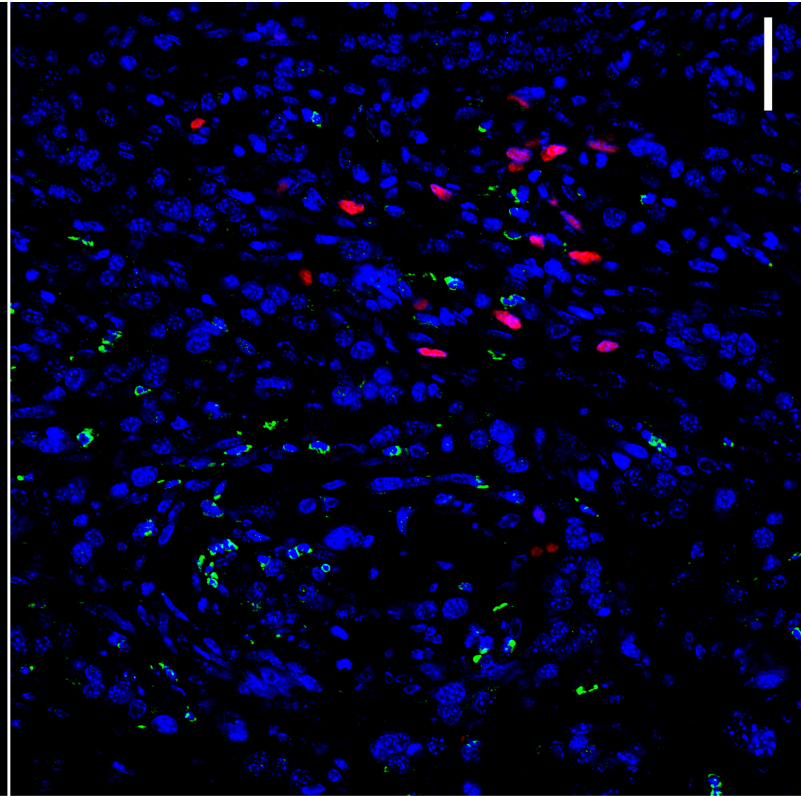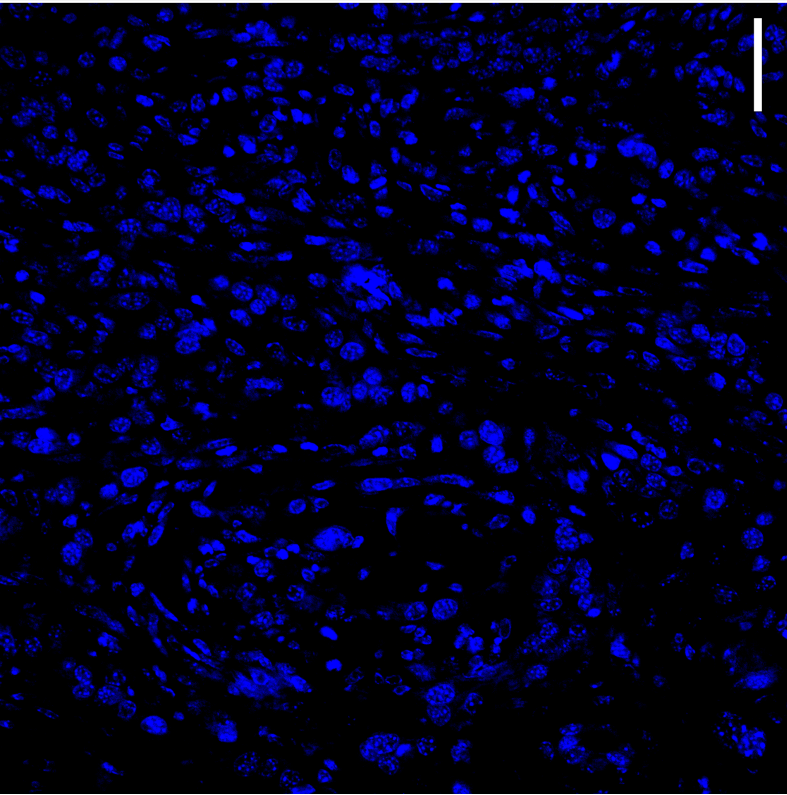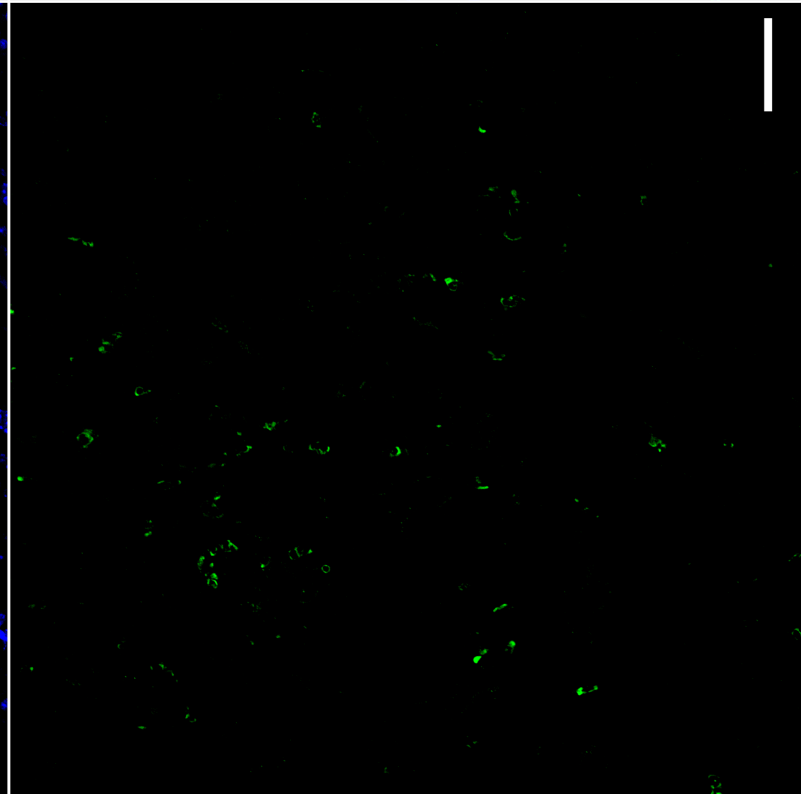

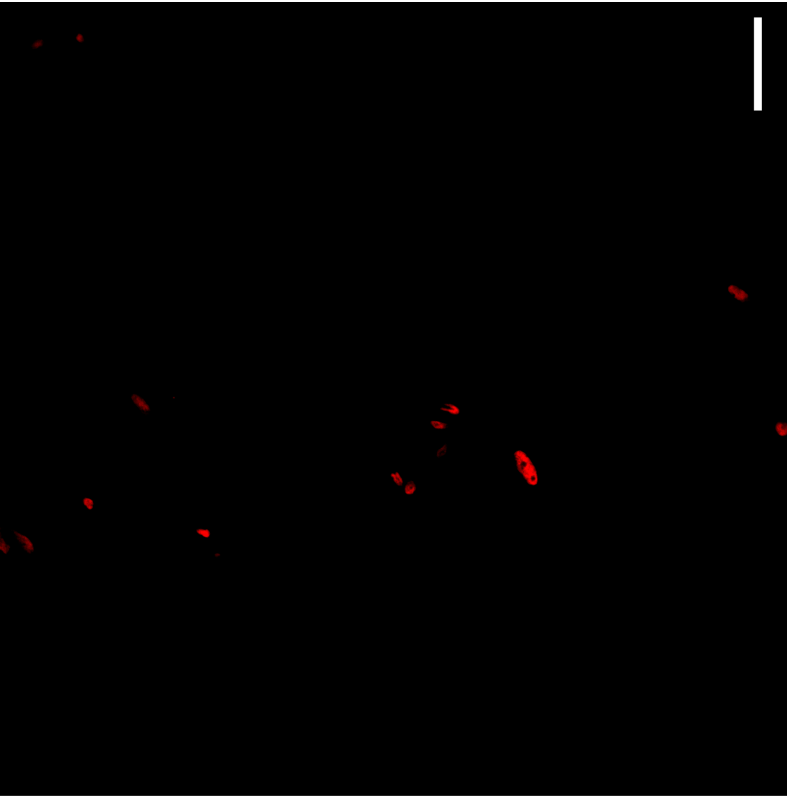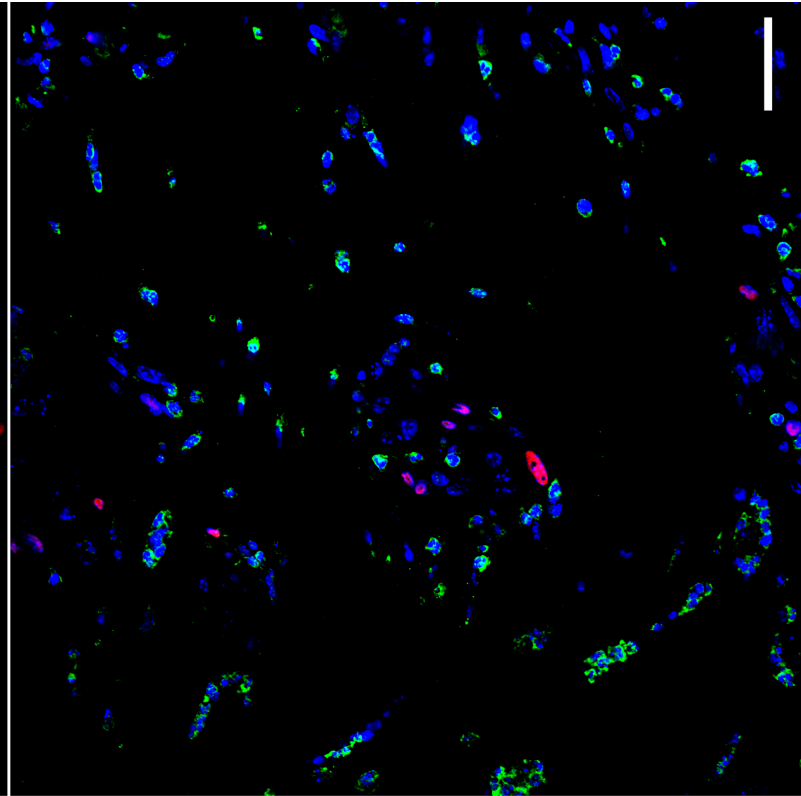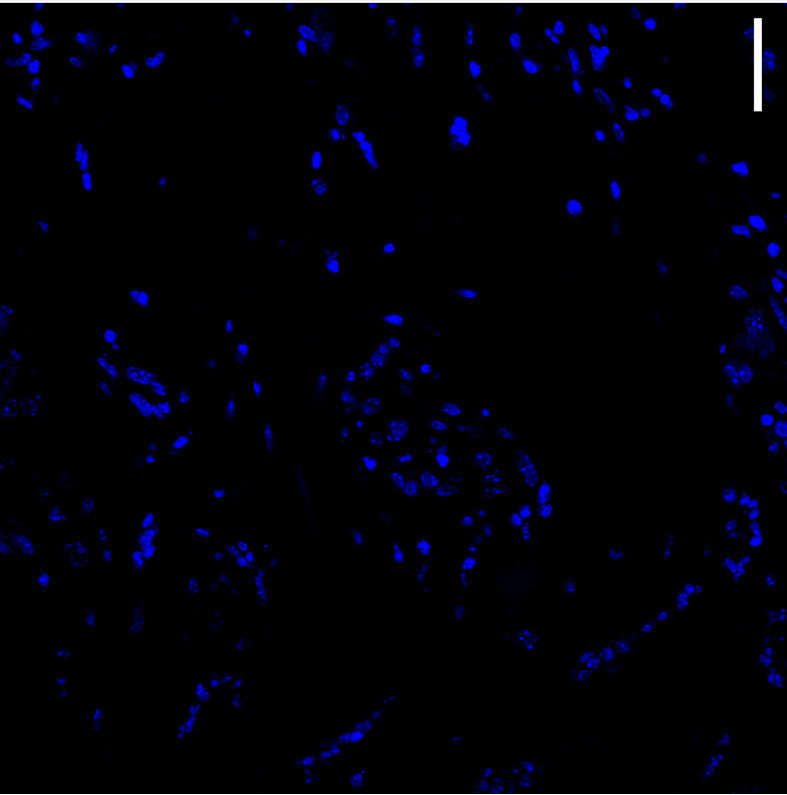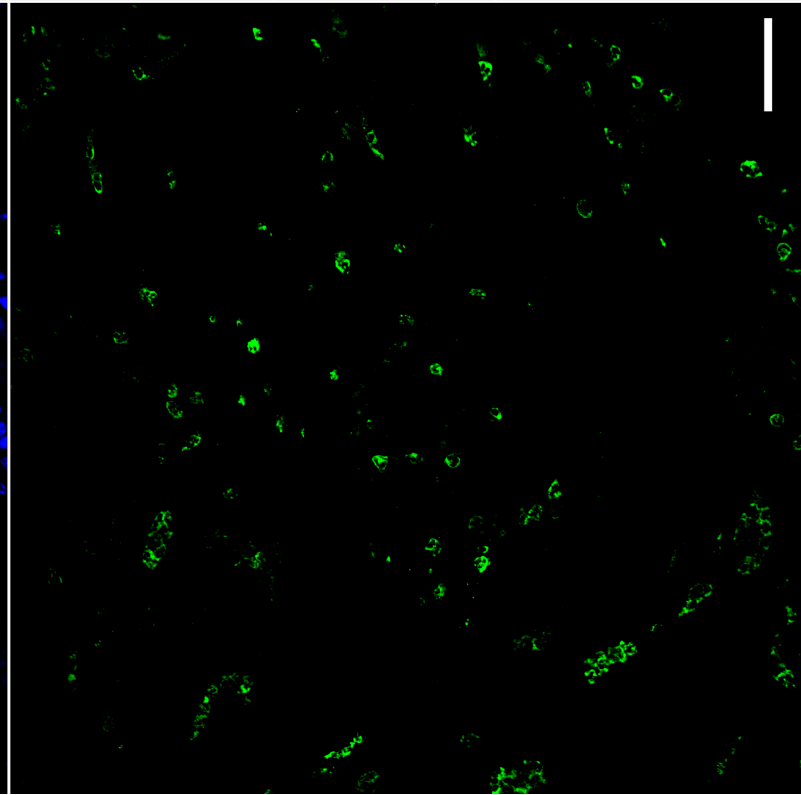

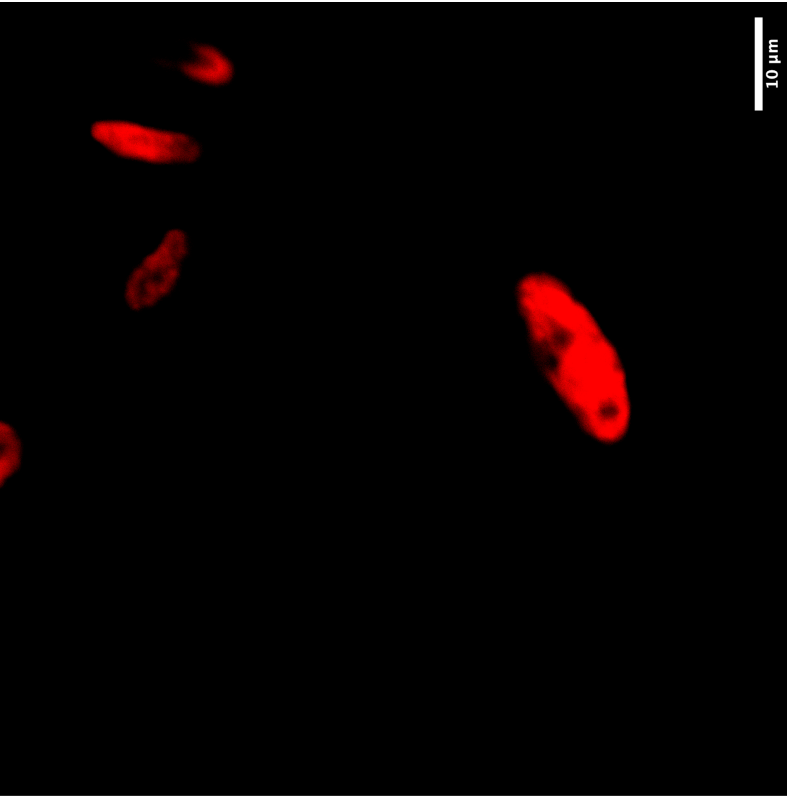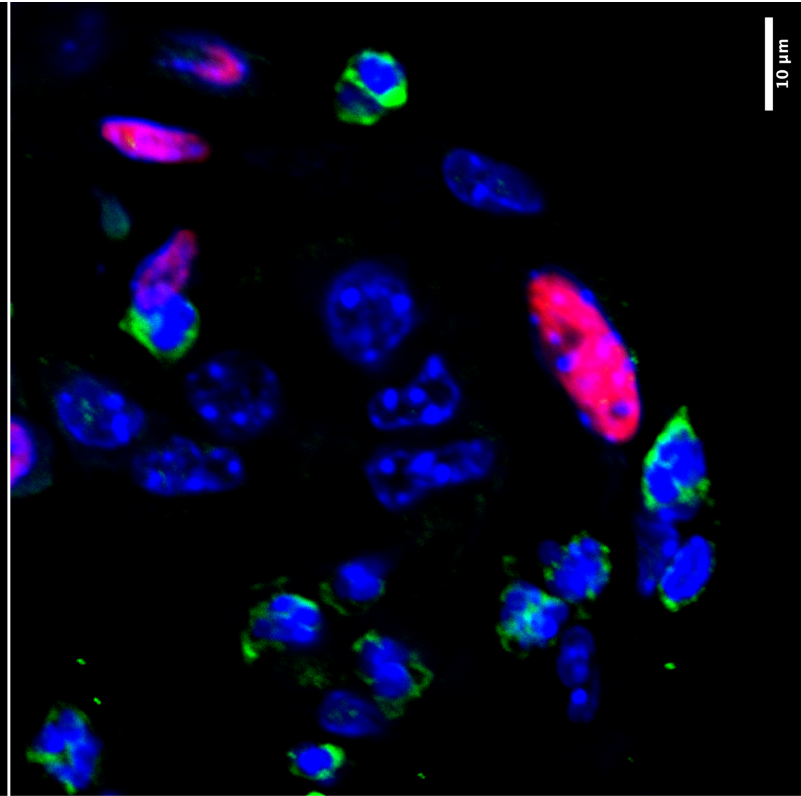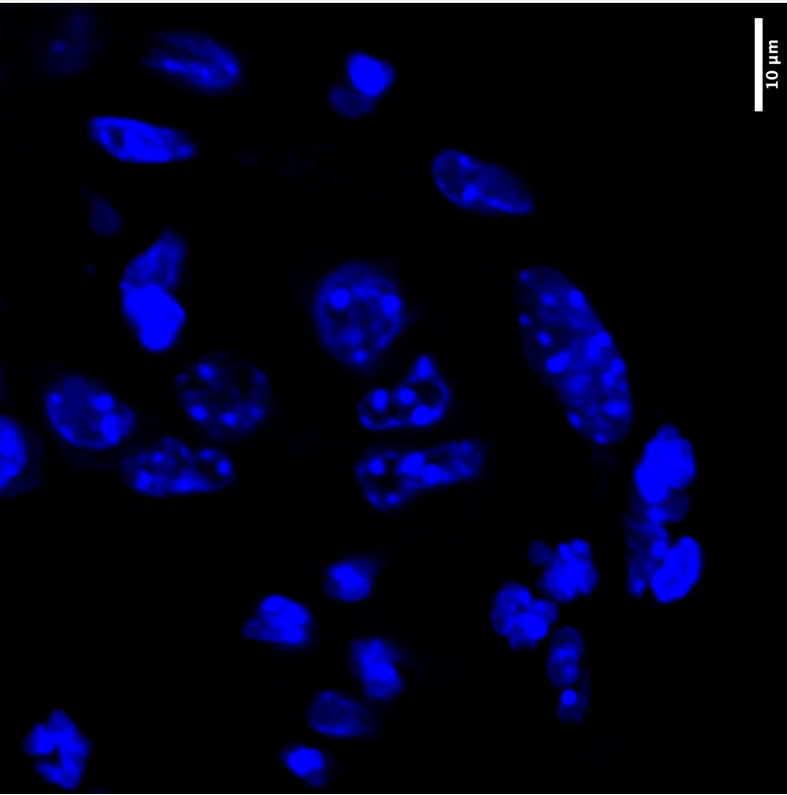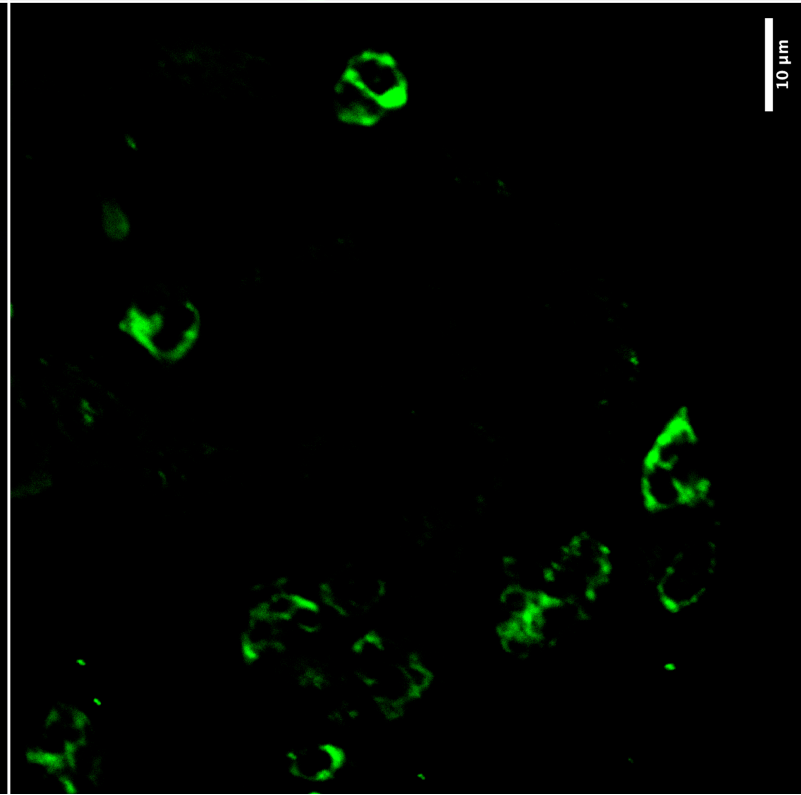

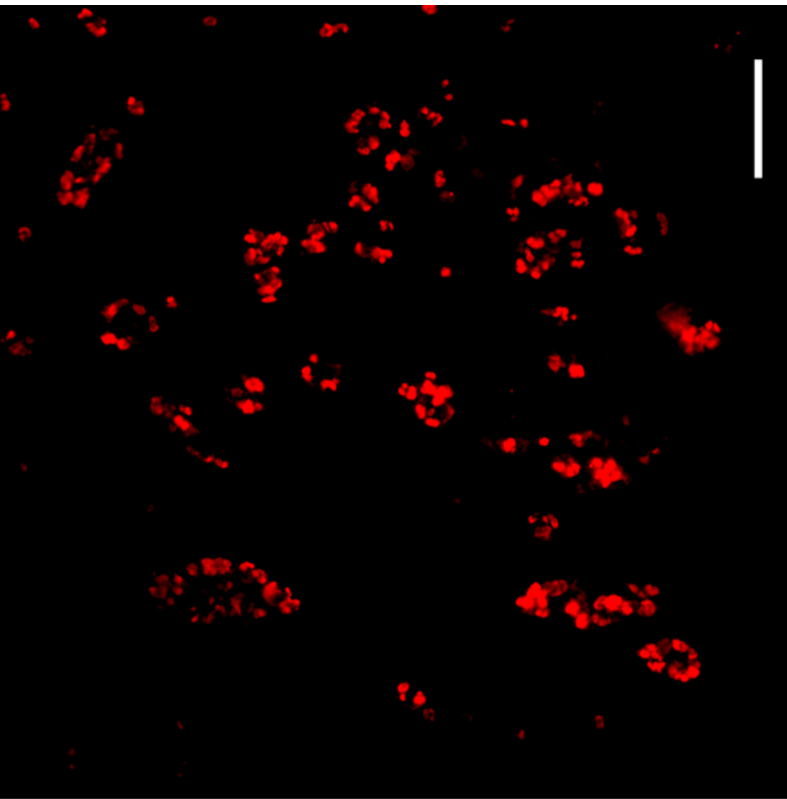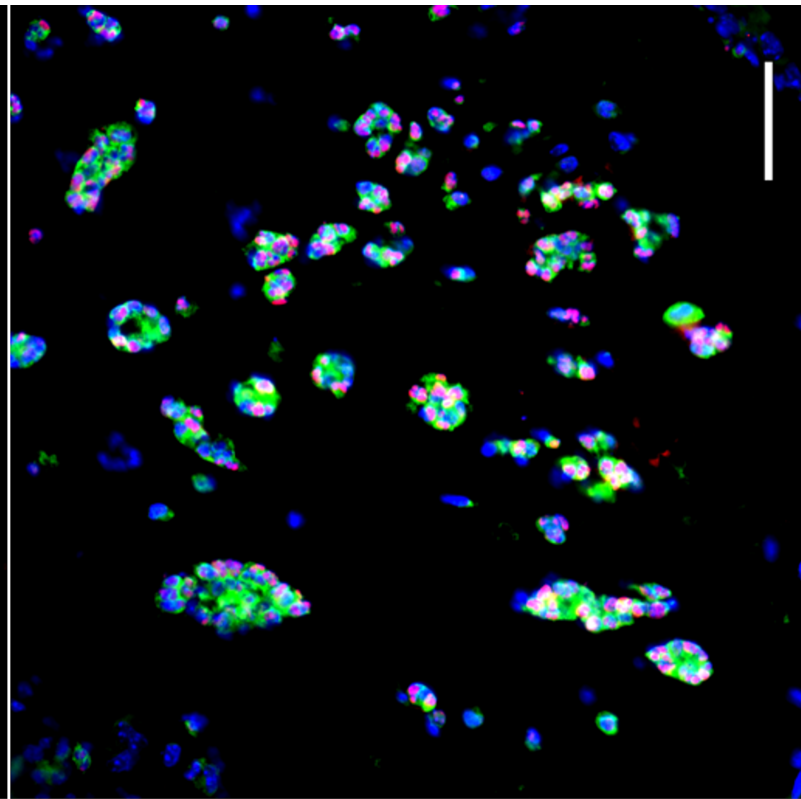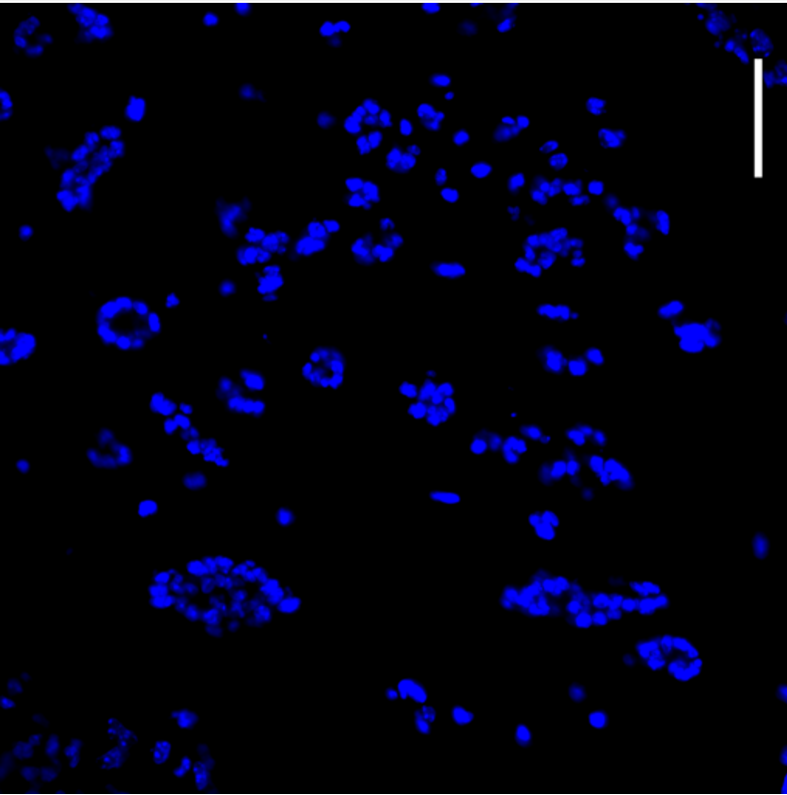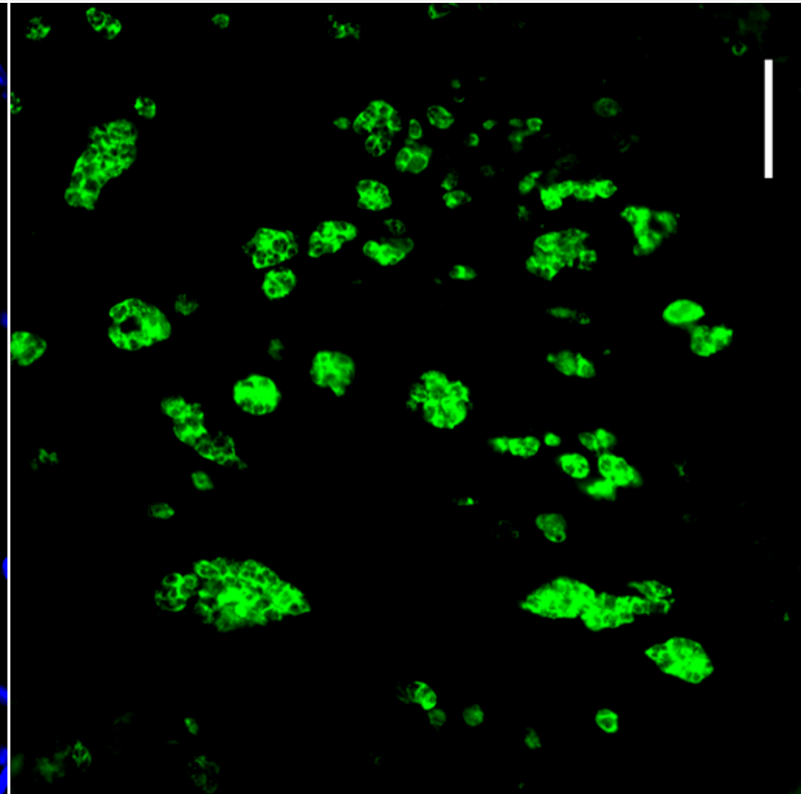

Supplement: EMBR-24-e56524-s003.pdf [file EMBR-24-e56524-s003.pdf]

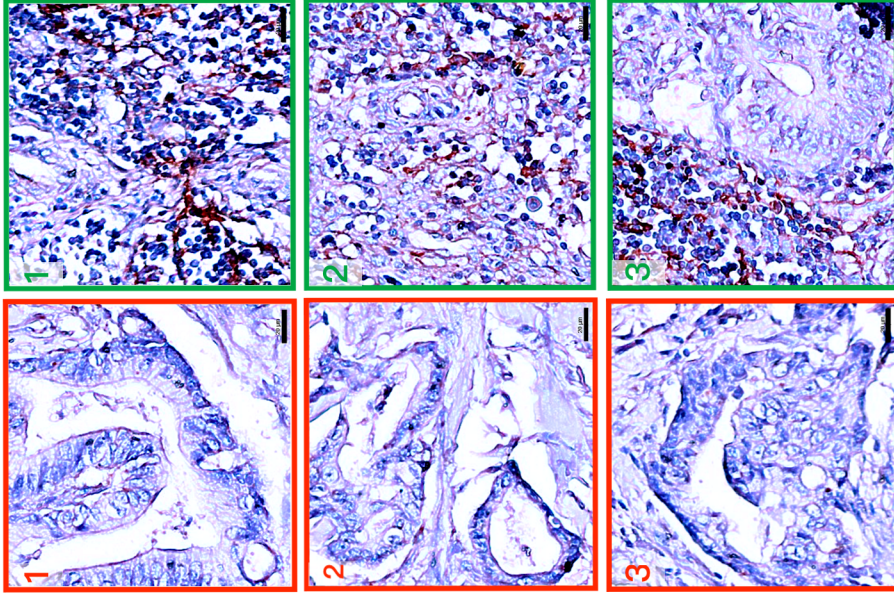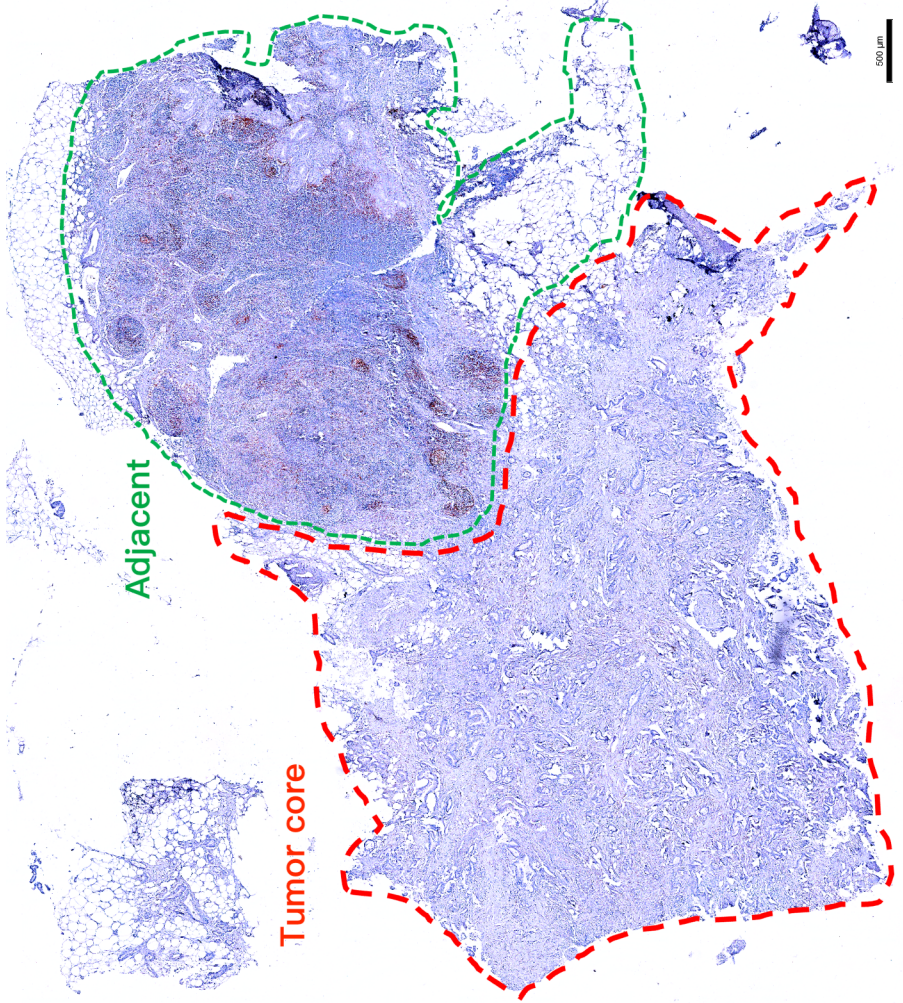

*p48Cre;Kras<sup>G12D</sup>*

DAPI/CD106/ $\alpha$ SMA

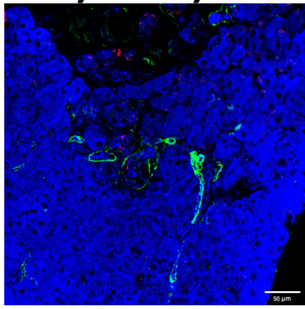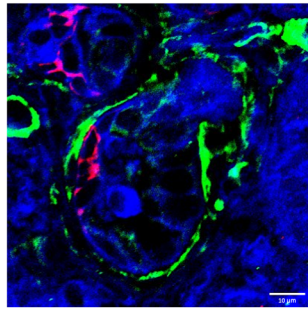

DAPI/CD106/CK19

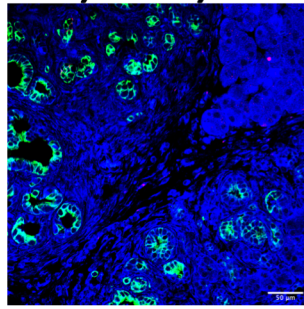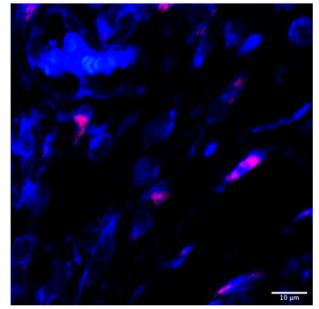

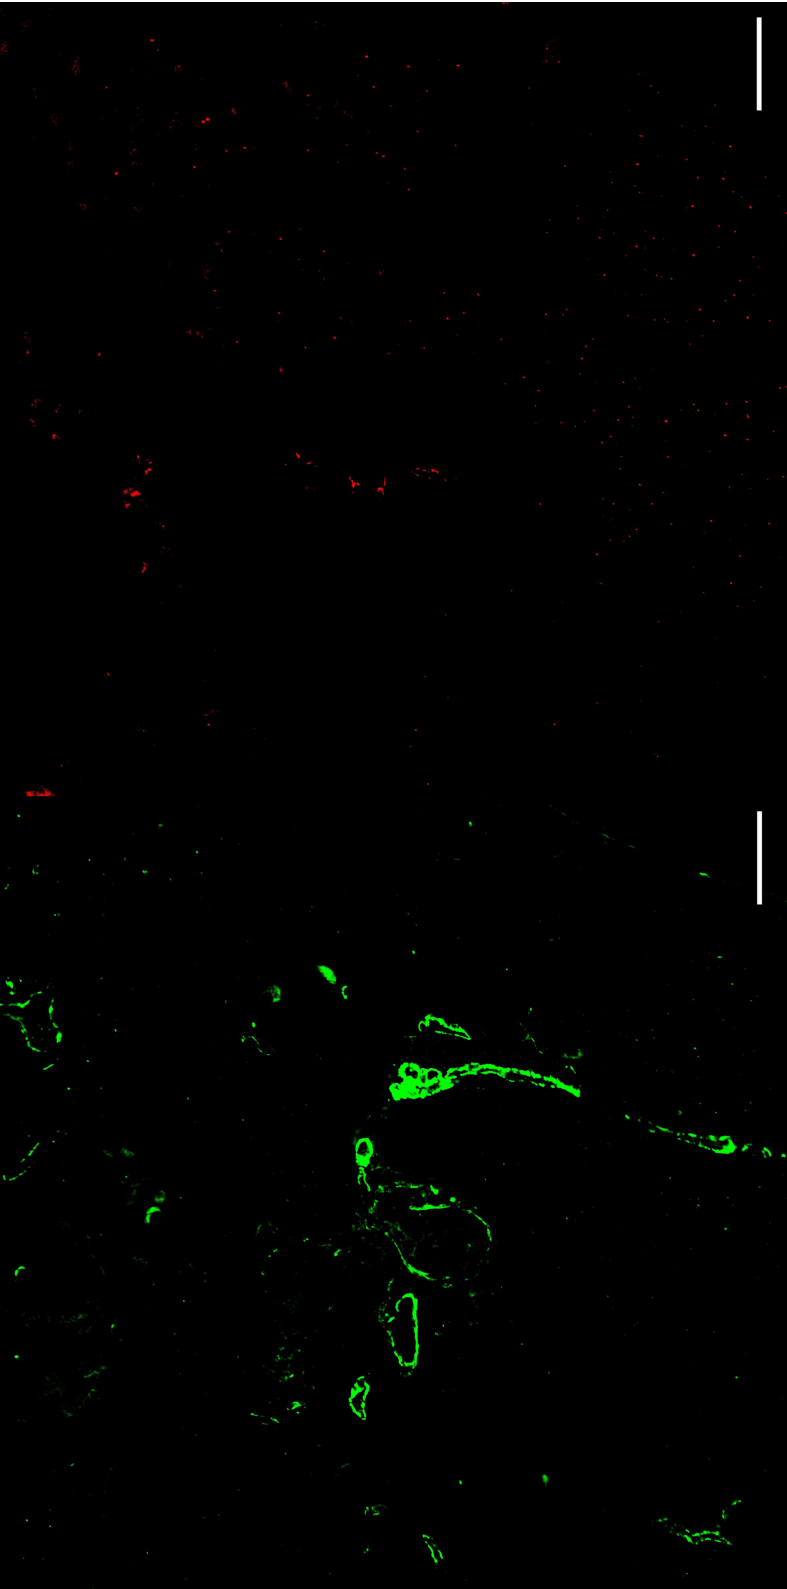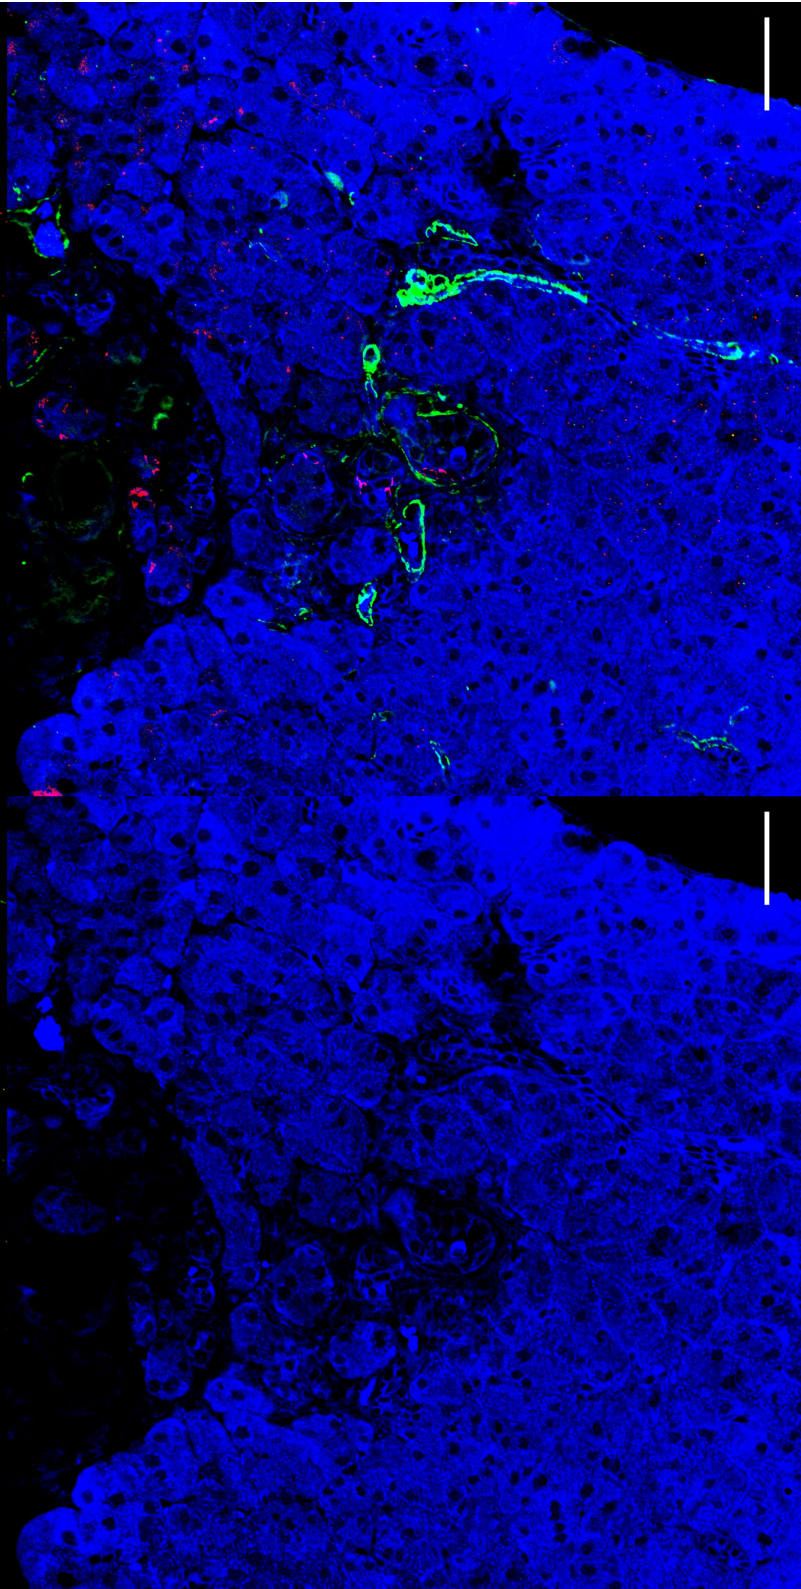

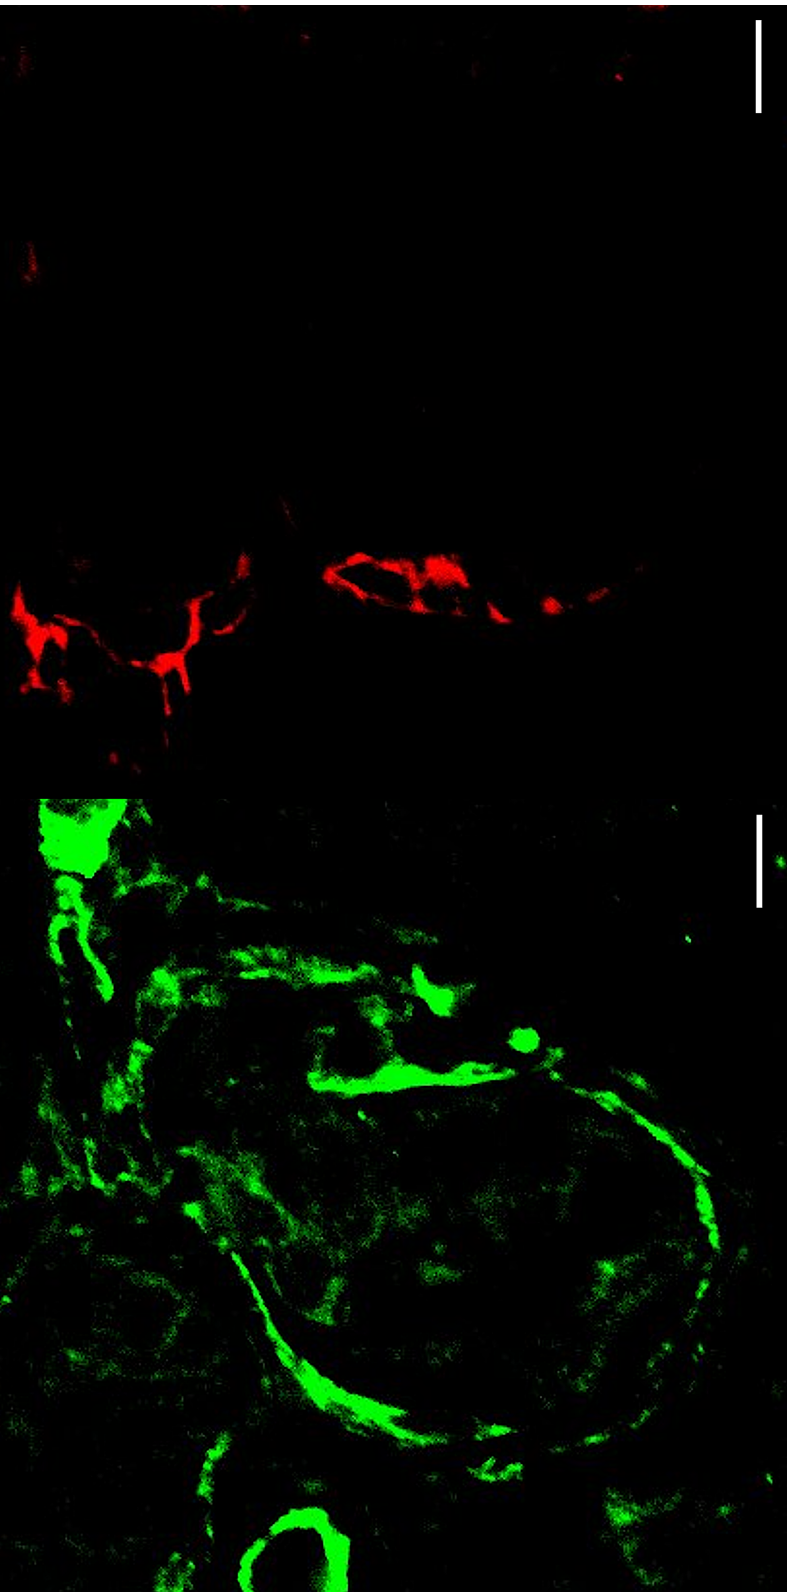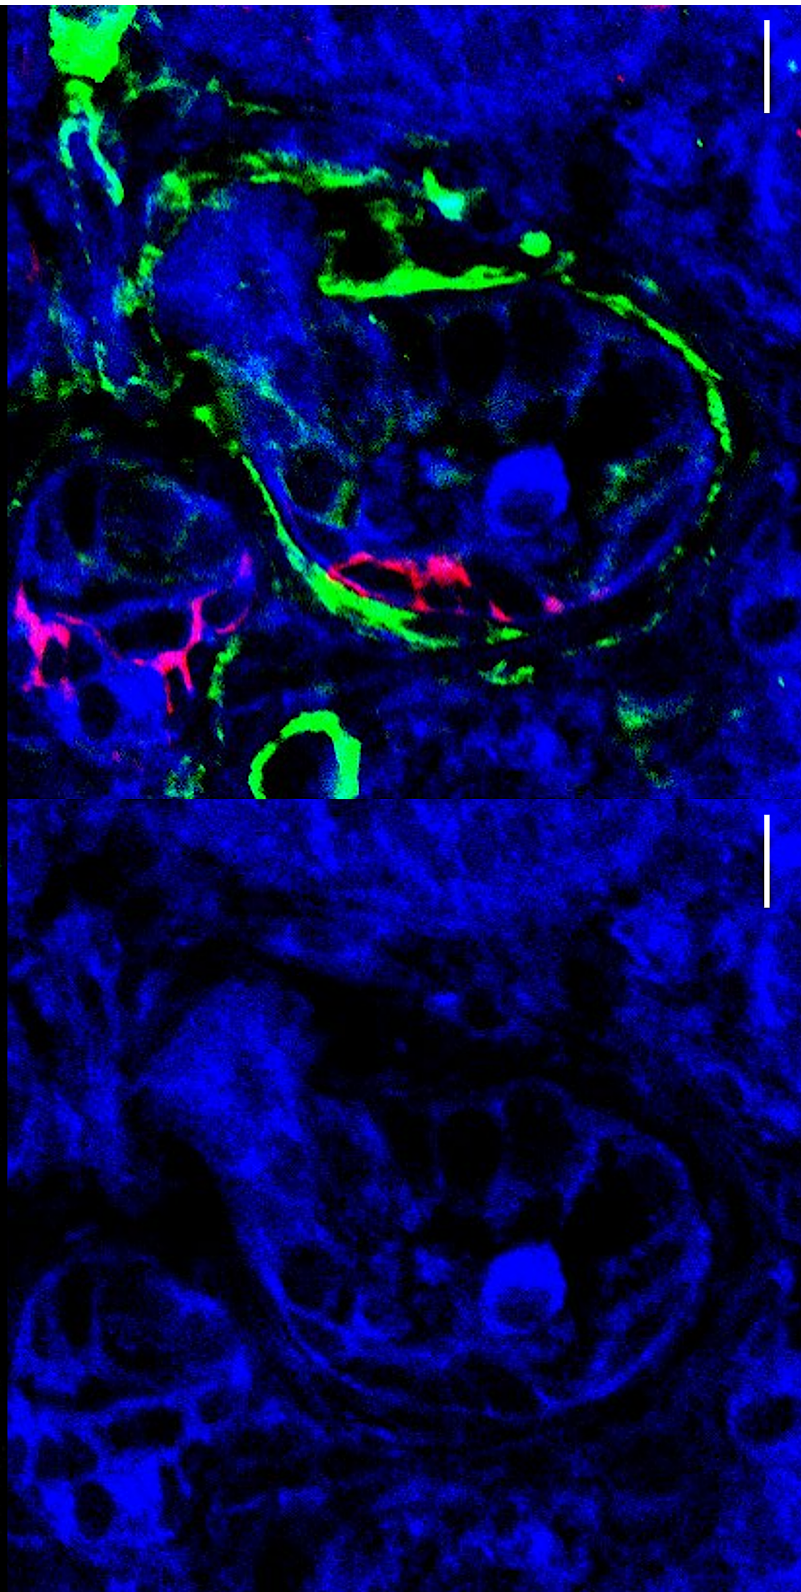

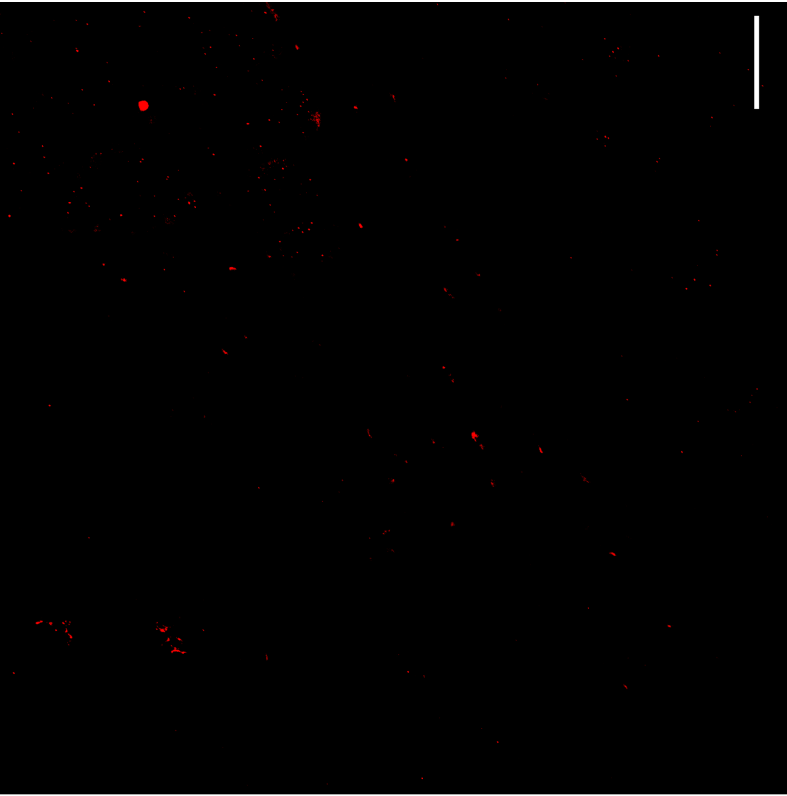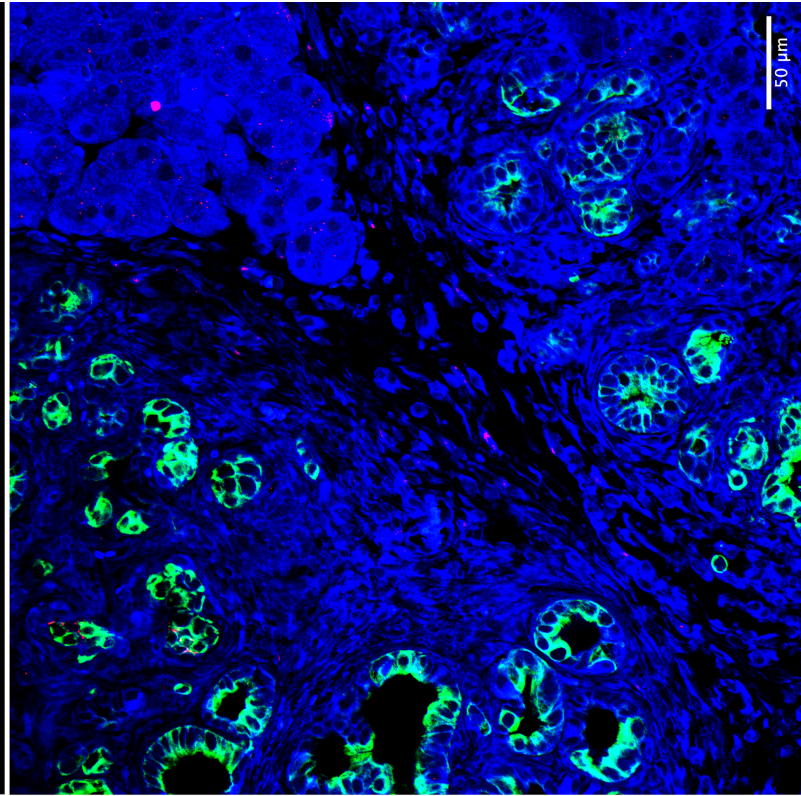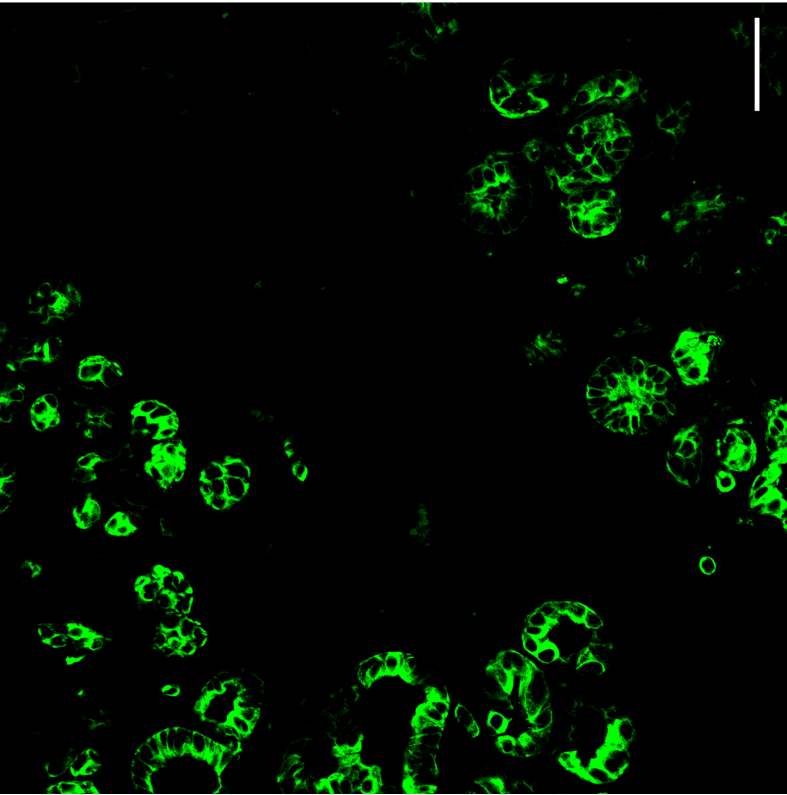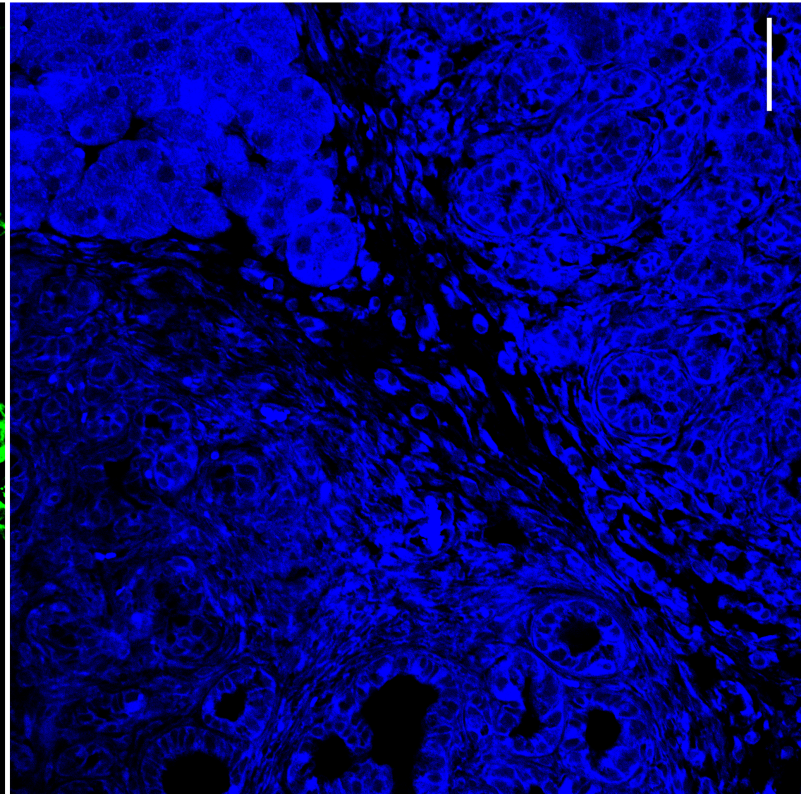

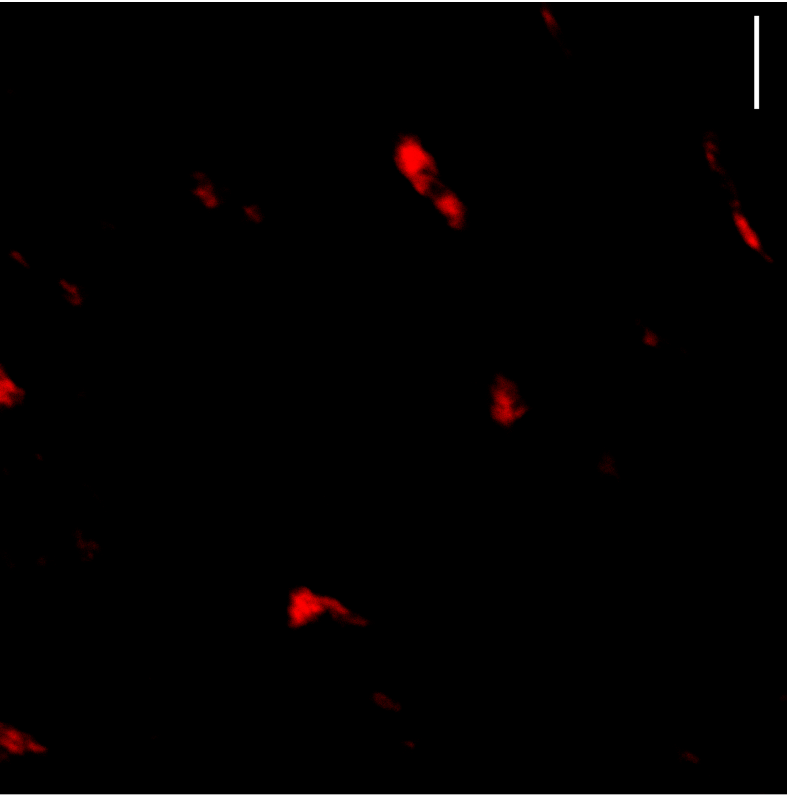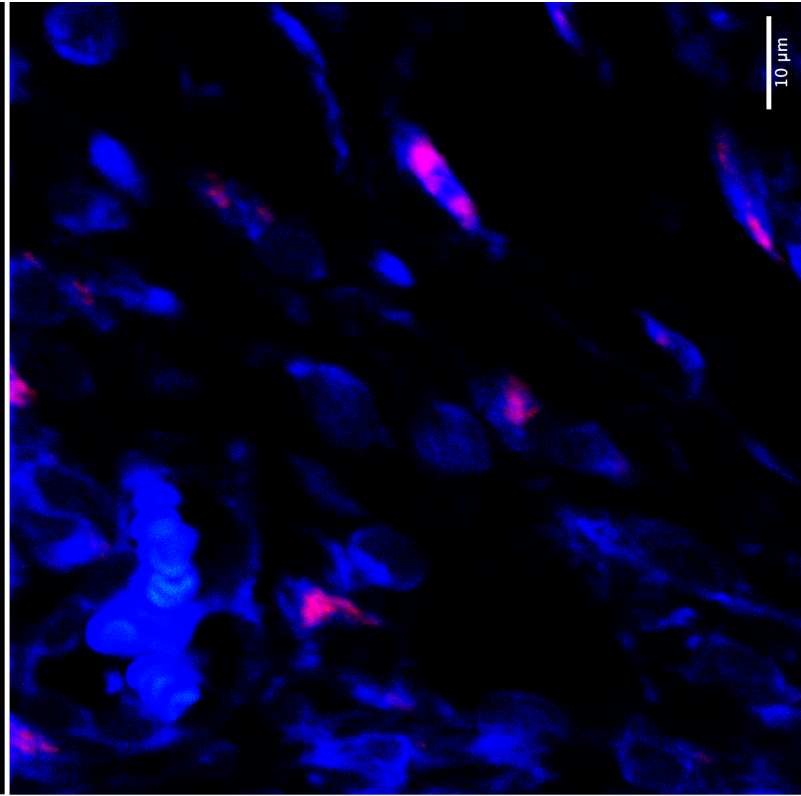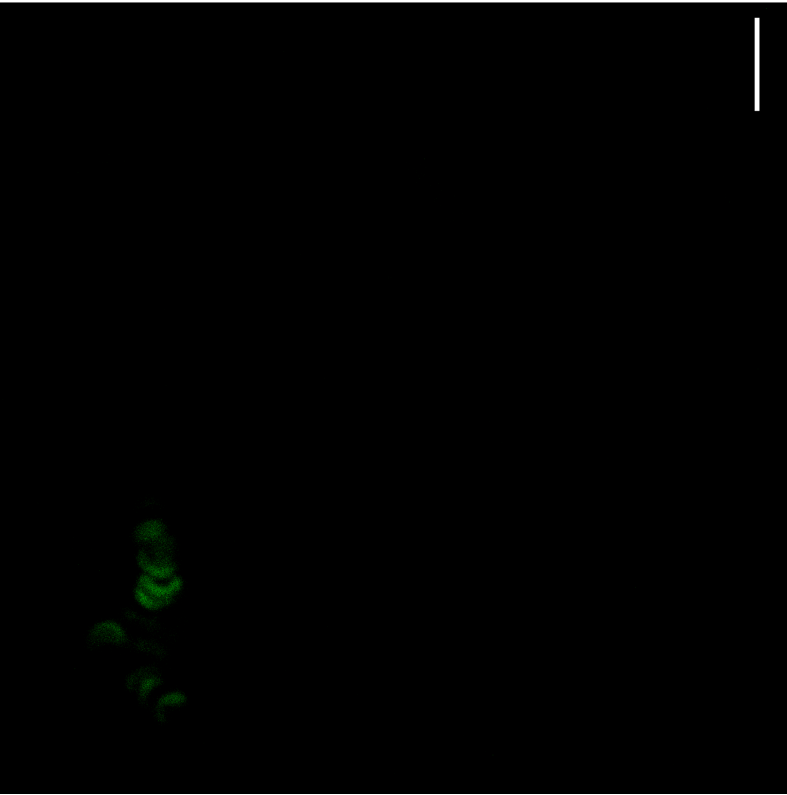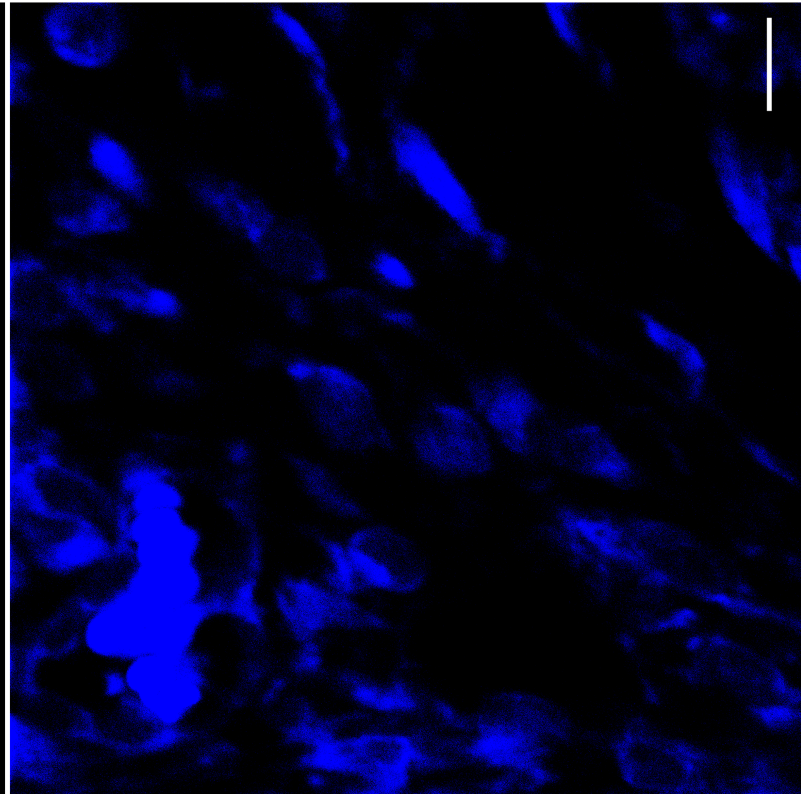

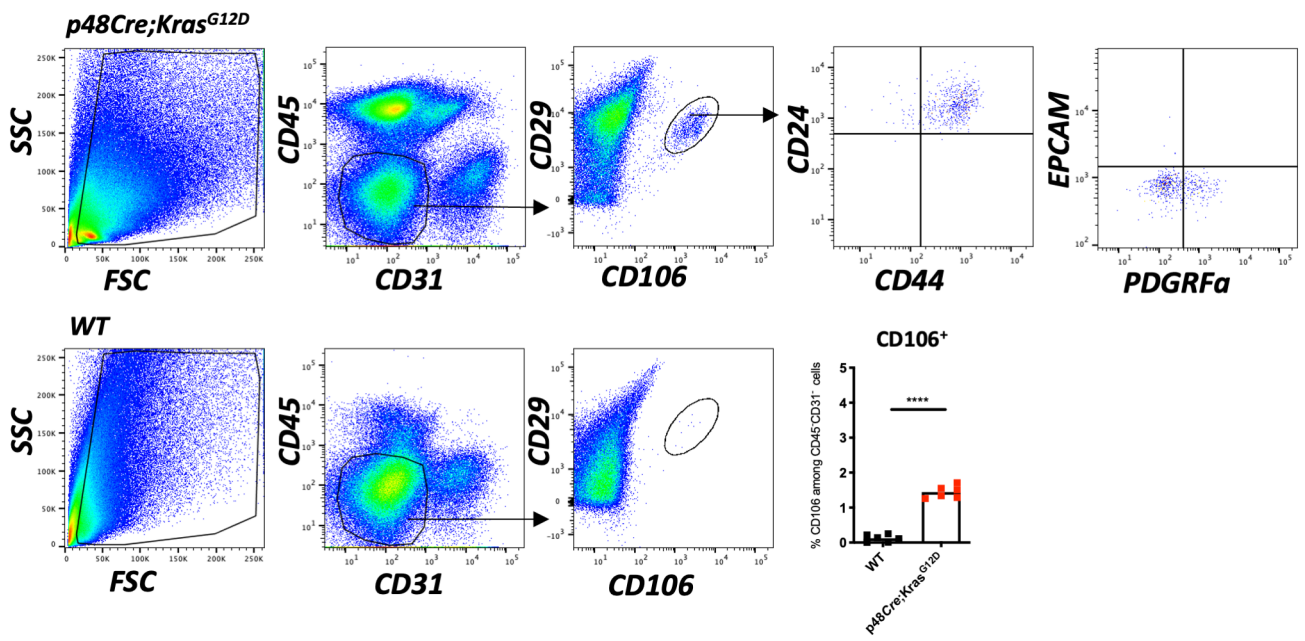

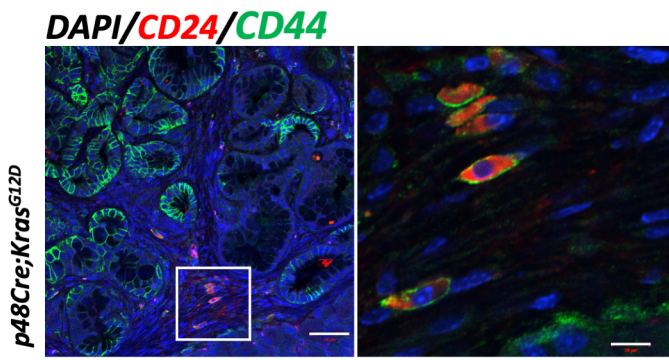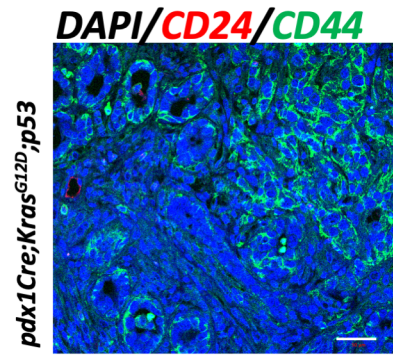



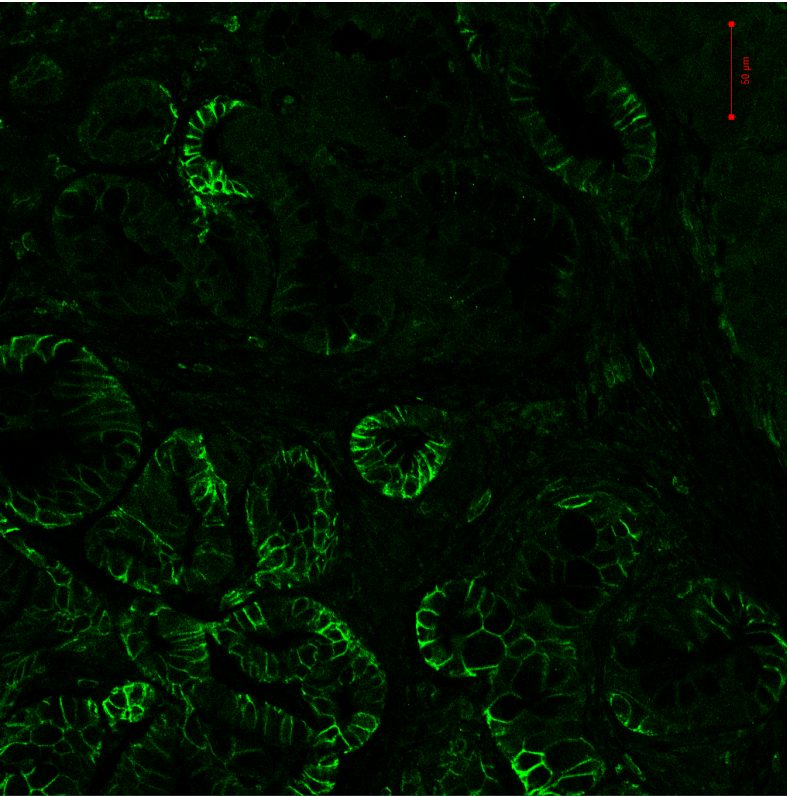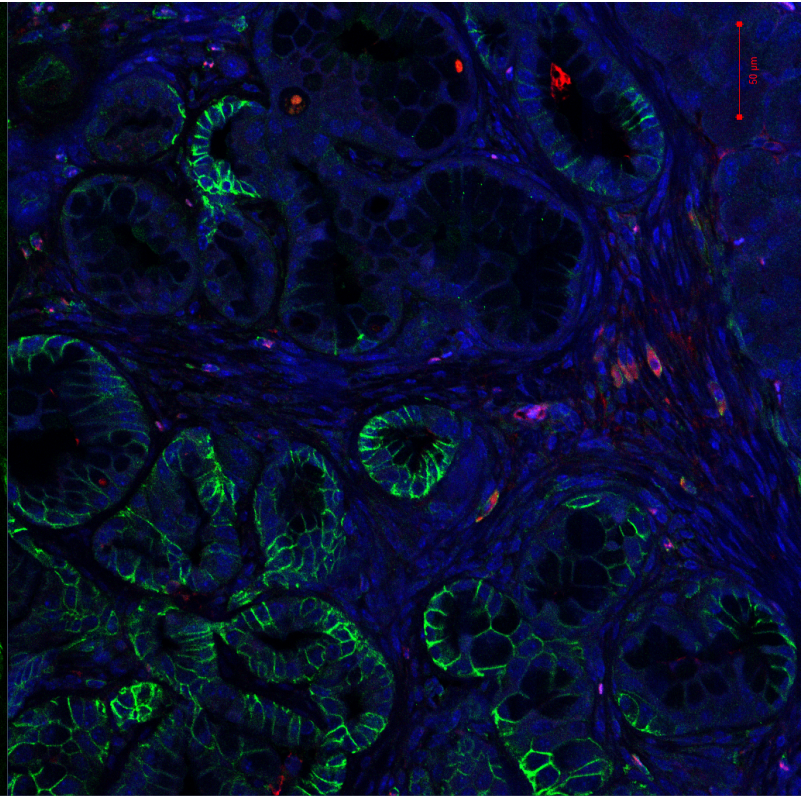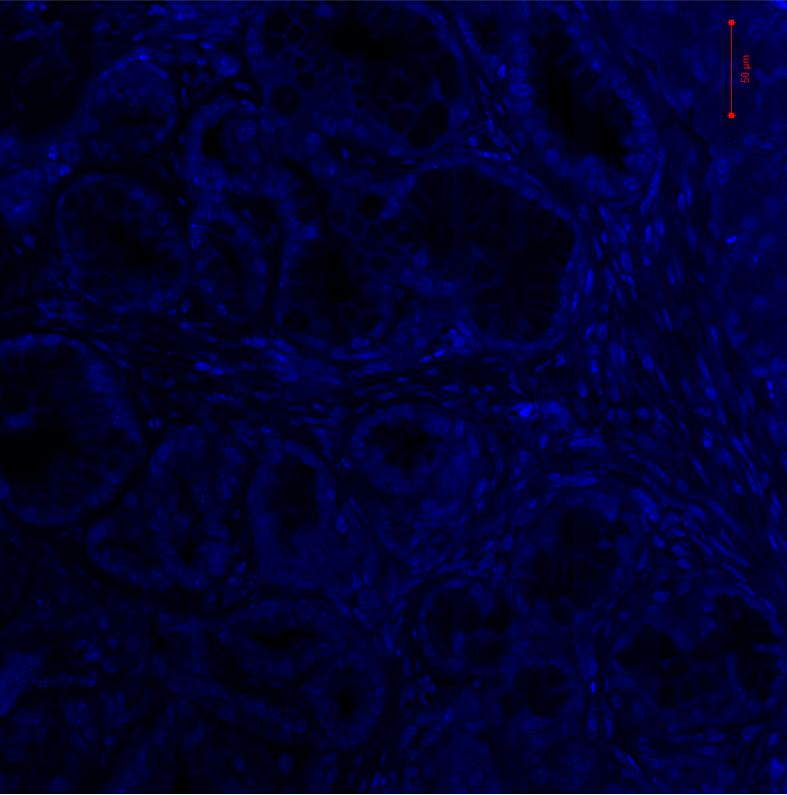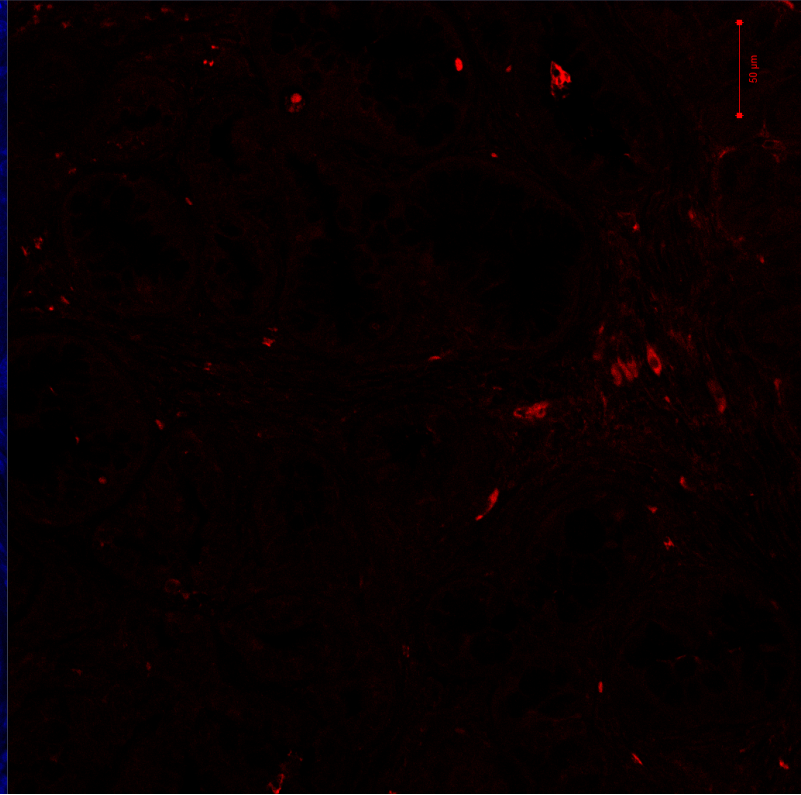

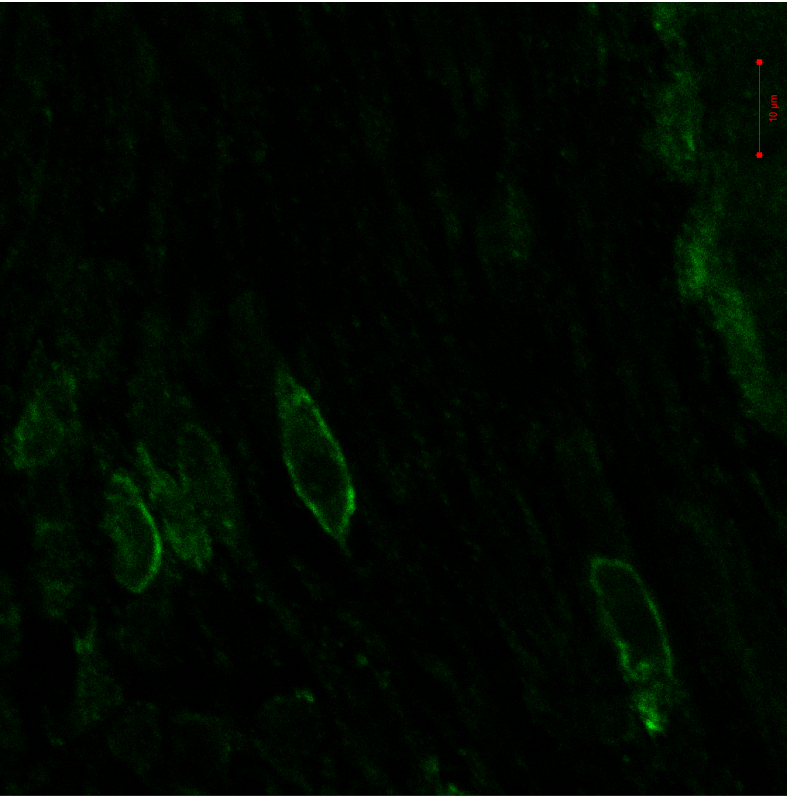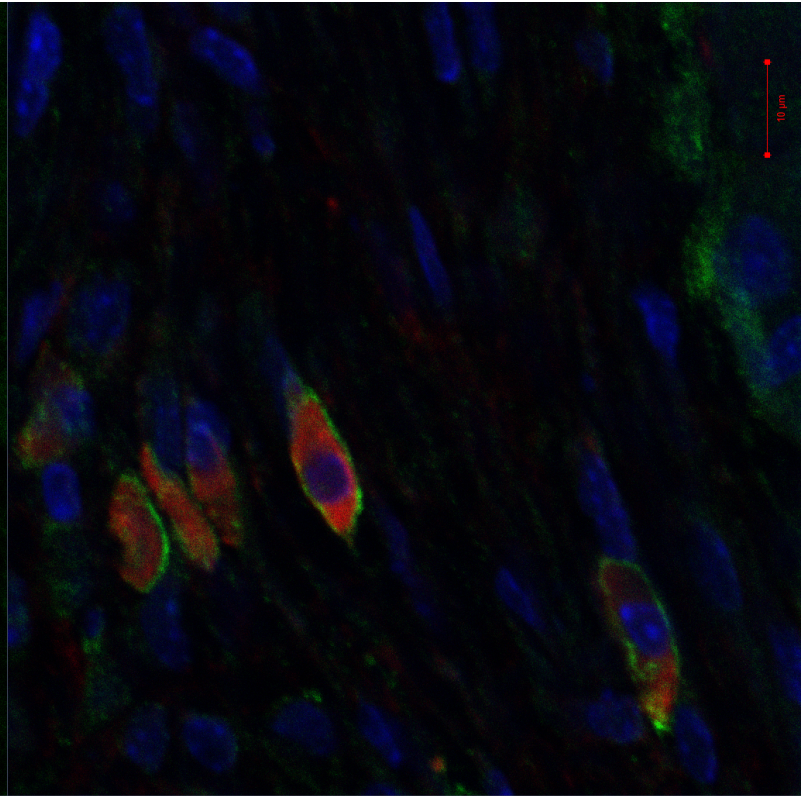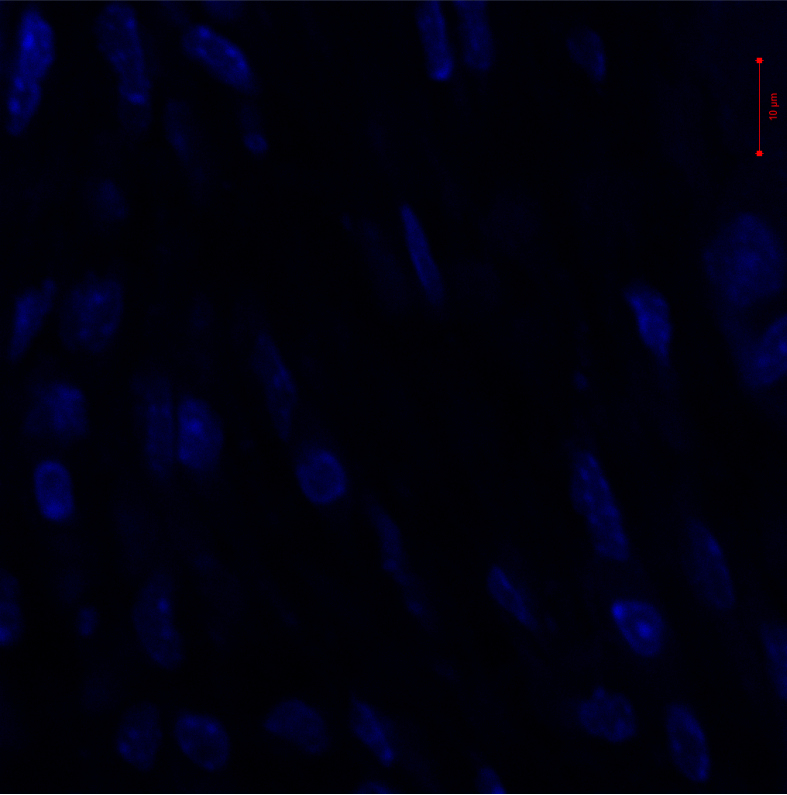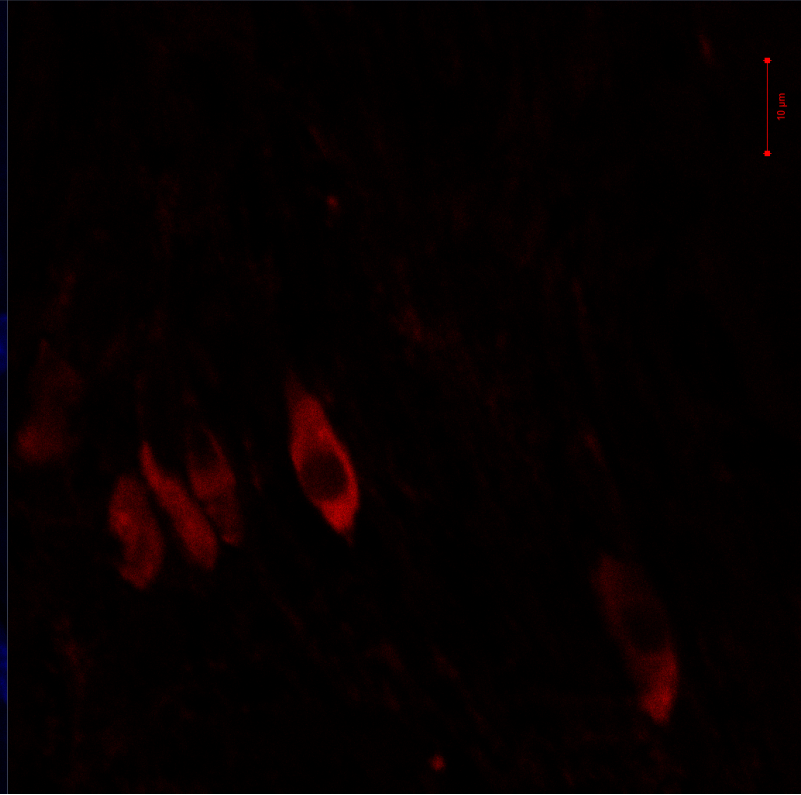

Supplement: EMBR-24-e56524-s005.pdf [file EMBR-24-e56524-s005.pdf]

|  | Group A | Group B  |
|----------------------------------------------------------------------------------|---------|----------|
|                                                                                  | Epi     | Epi+PeSC |
|                                                                                  | Y       | Y        |
| 1                                                                                | 0.1552  | 0.1510   |
| 2                                                                                | 0.0780  | 0.2232   |
| 3                                                                                | 0.1073  | 0.1582   |
| 4                                                                                | 0.0713  | 0.1859   |
| 5                                                                                | 0.1422  | 0.1990   |
| 6                                                                                | 0.2064  | 0.2074   |
| 7                                                                                | 0.1479  | 0.1512   |
| 8                                                                                | 0.1235  | 0.1712   |

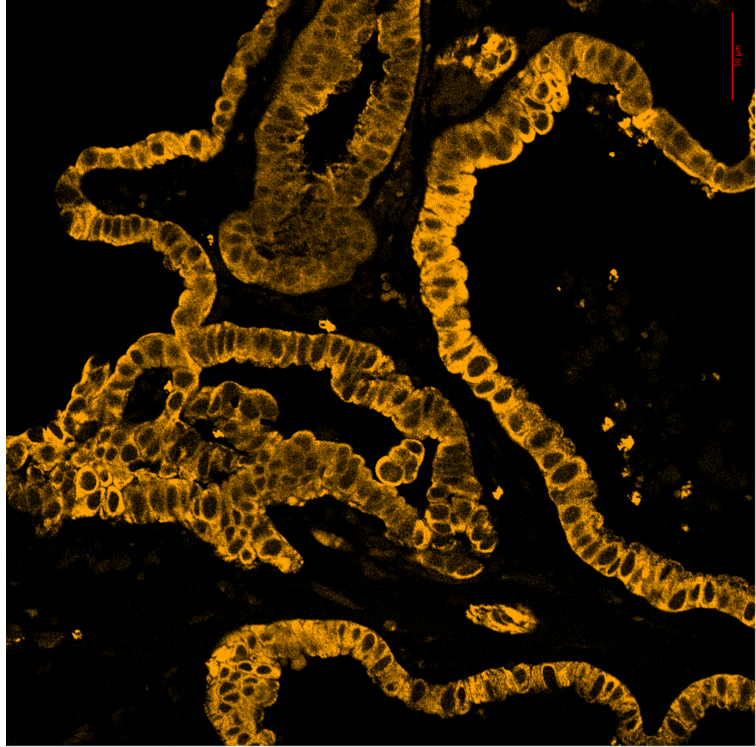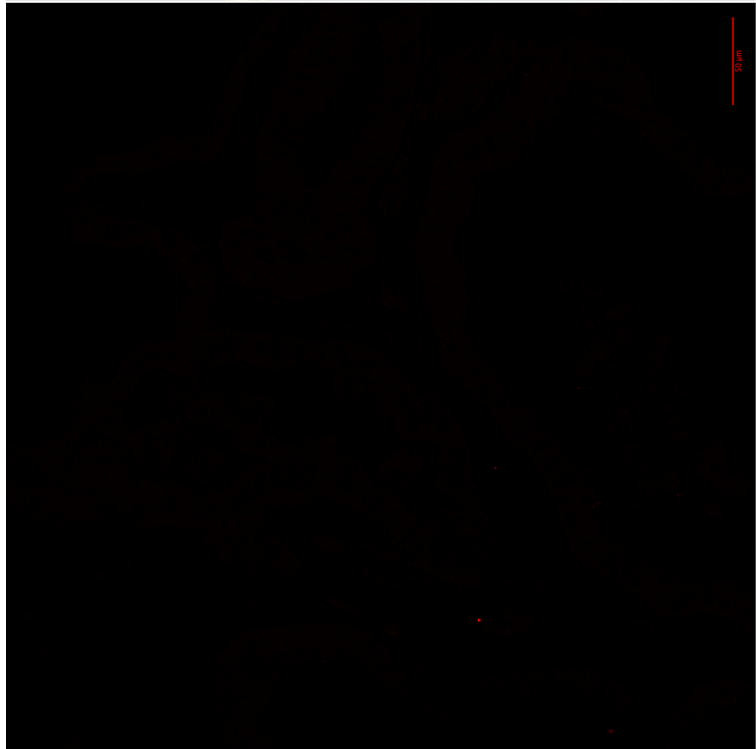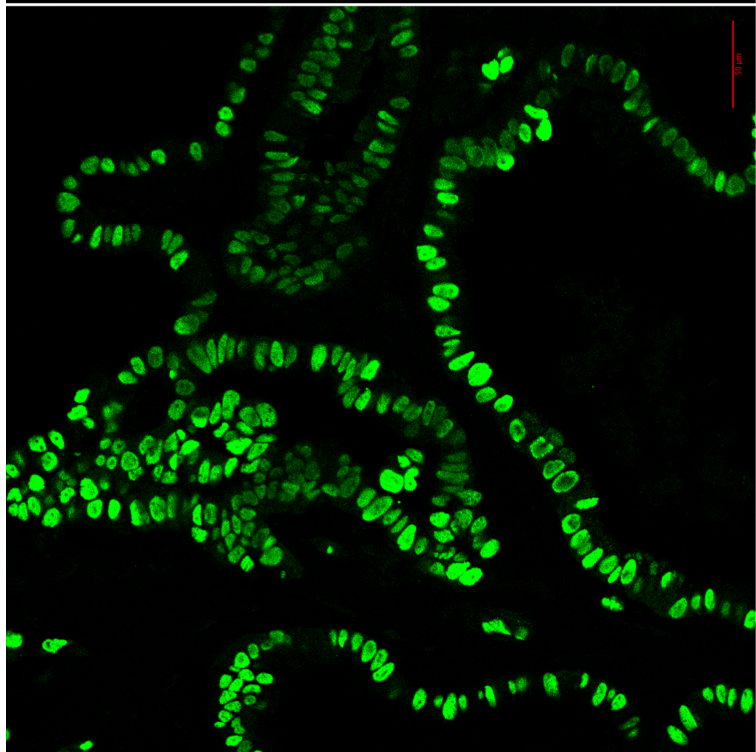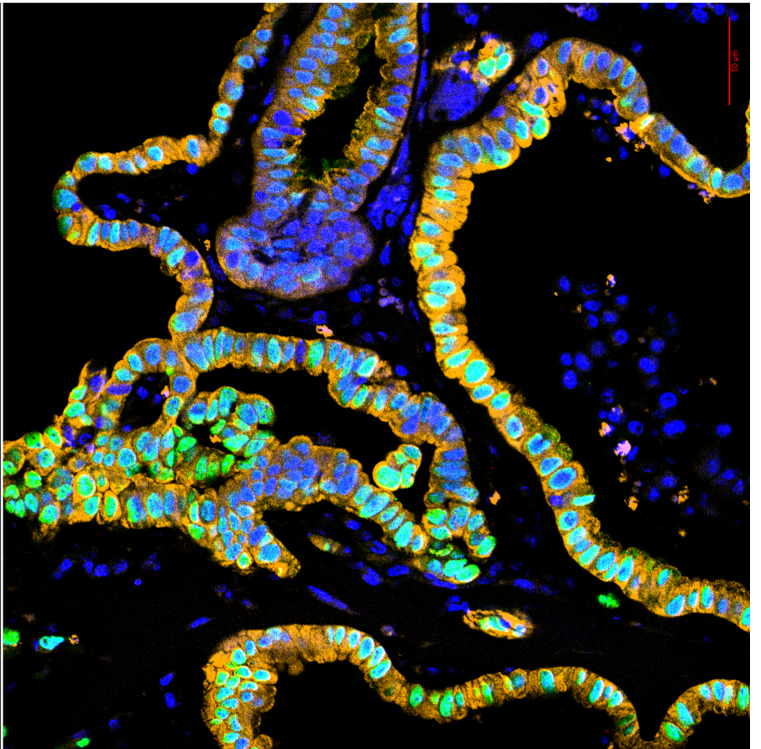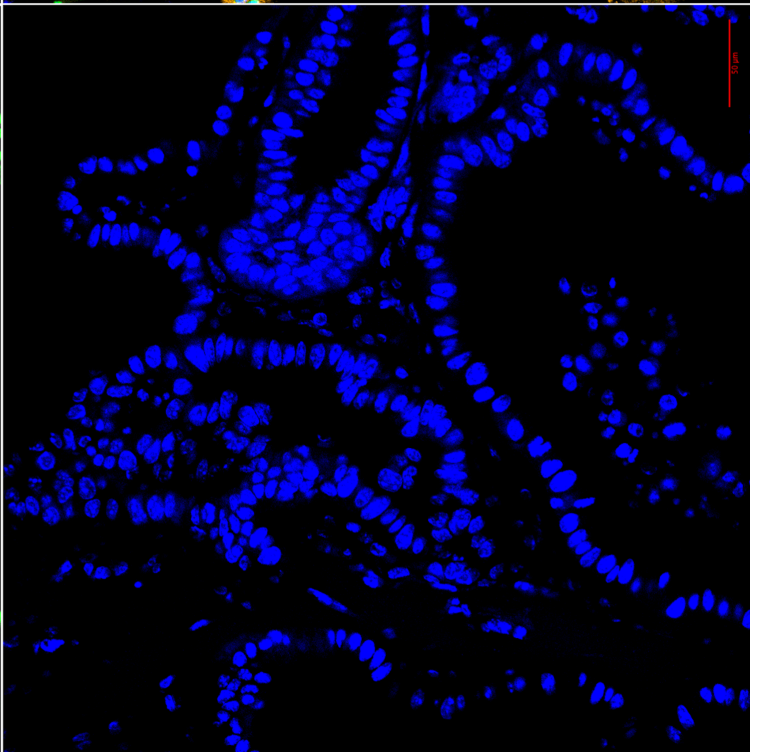

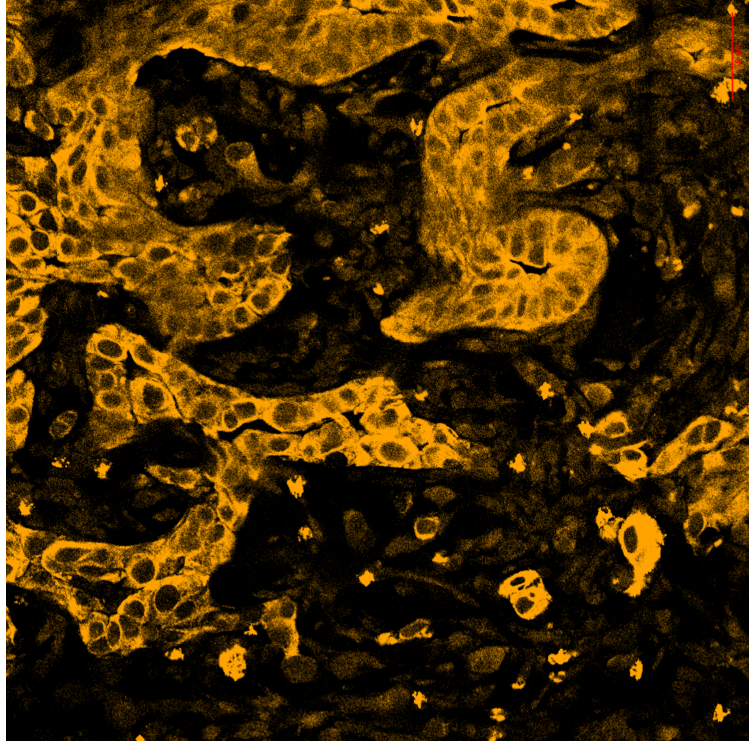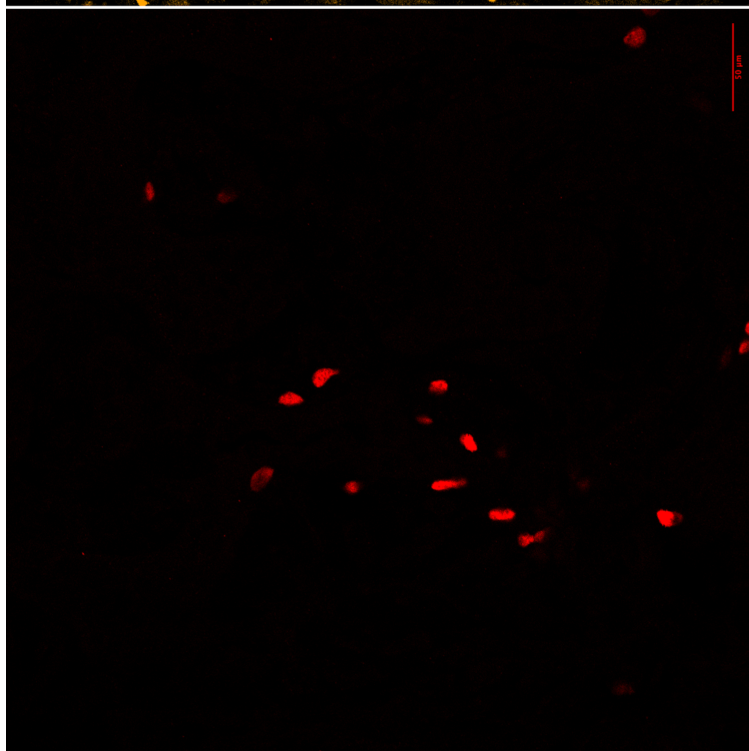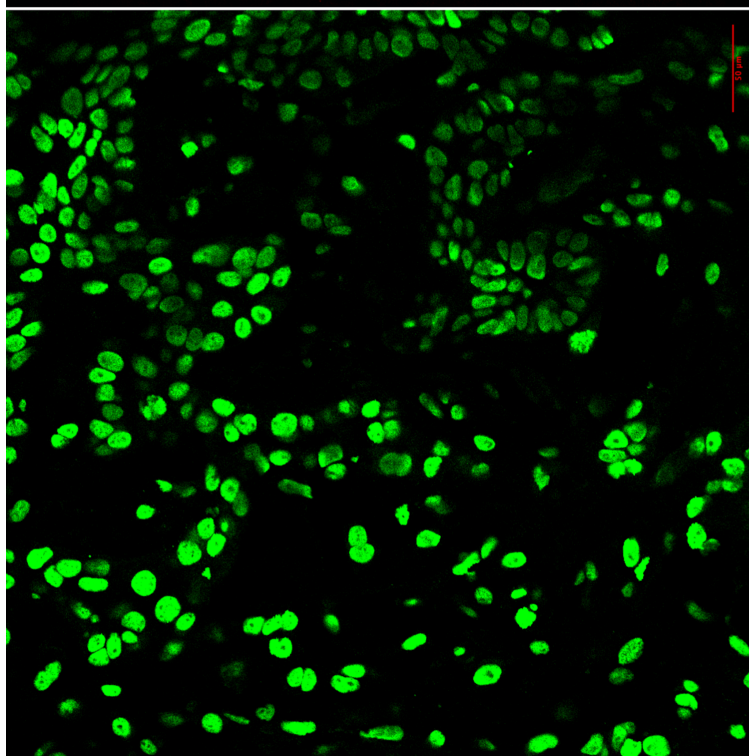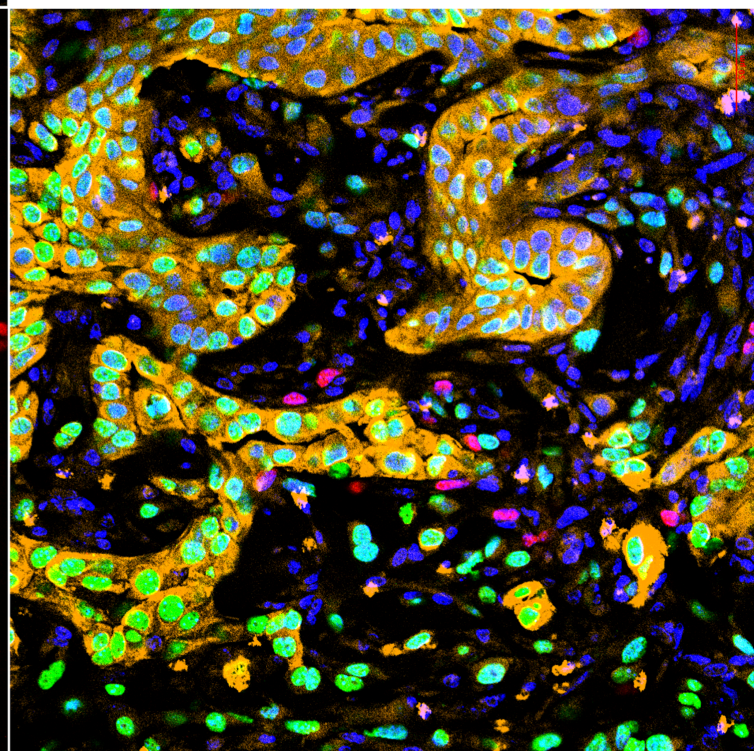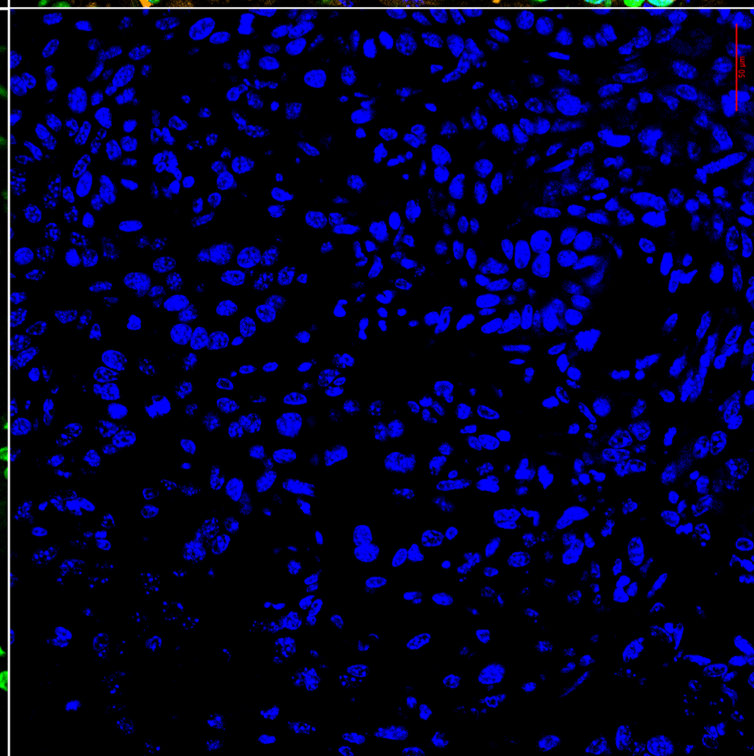

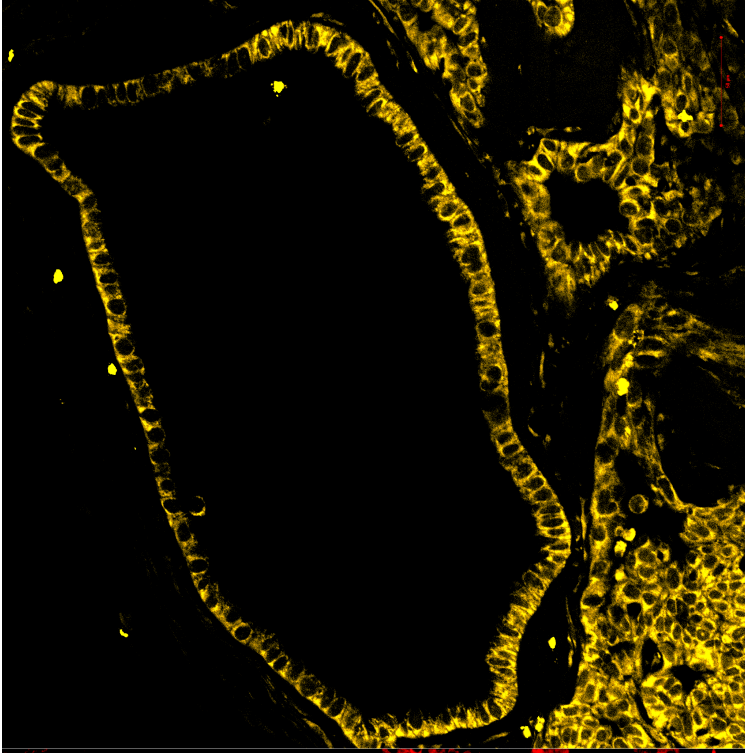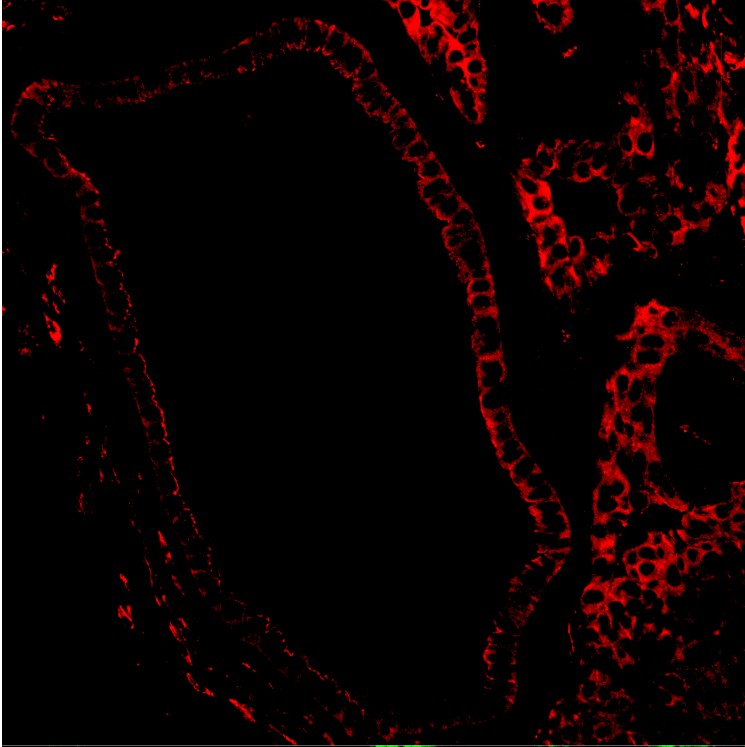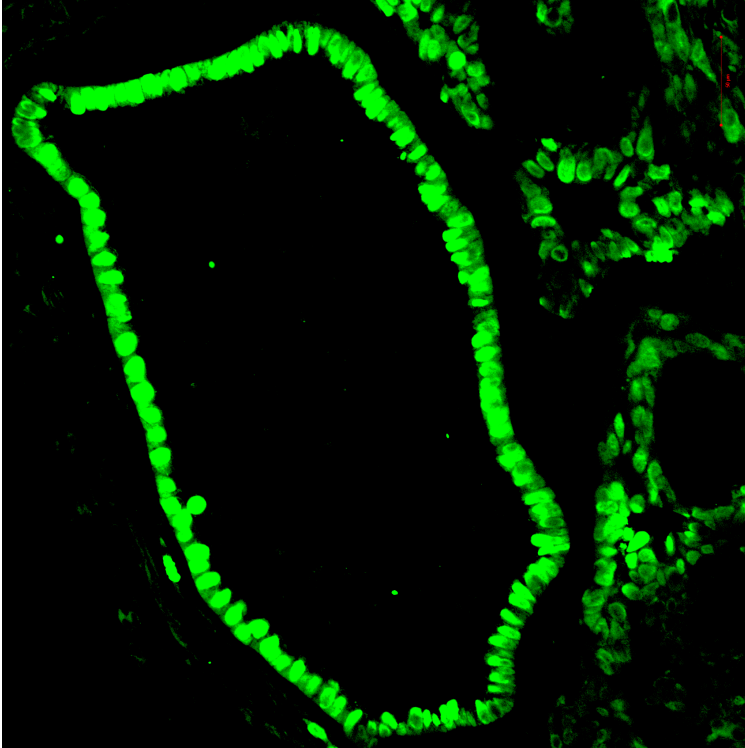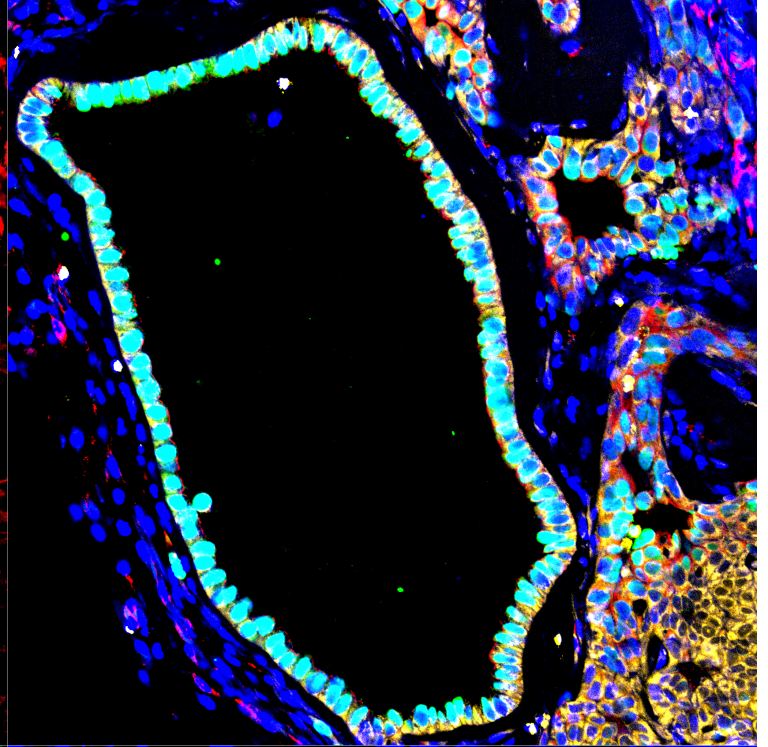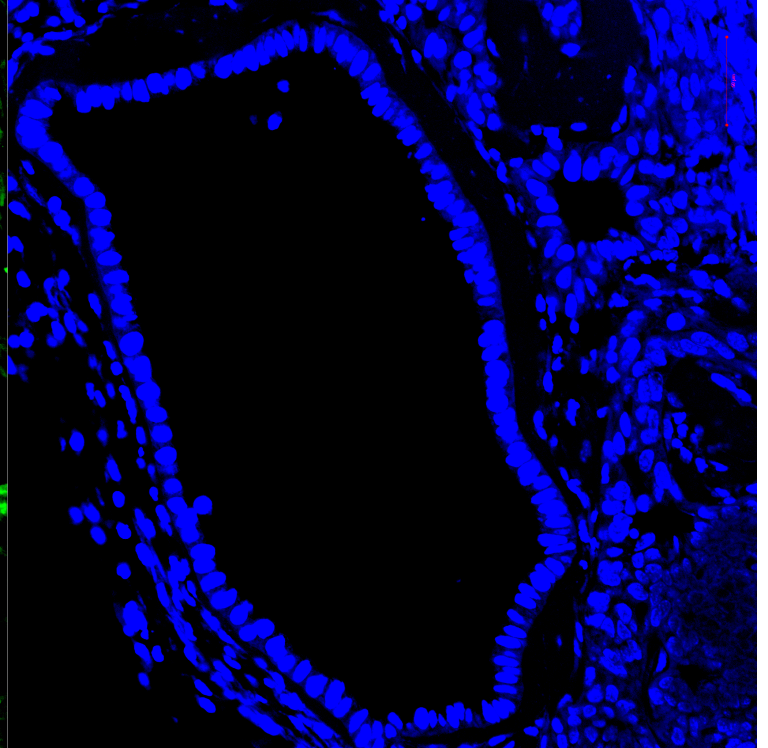



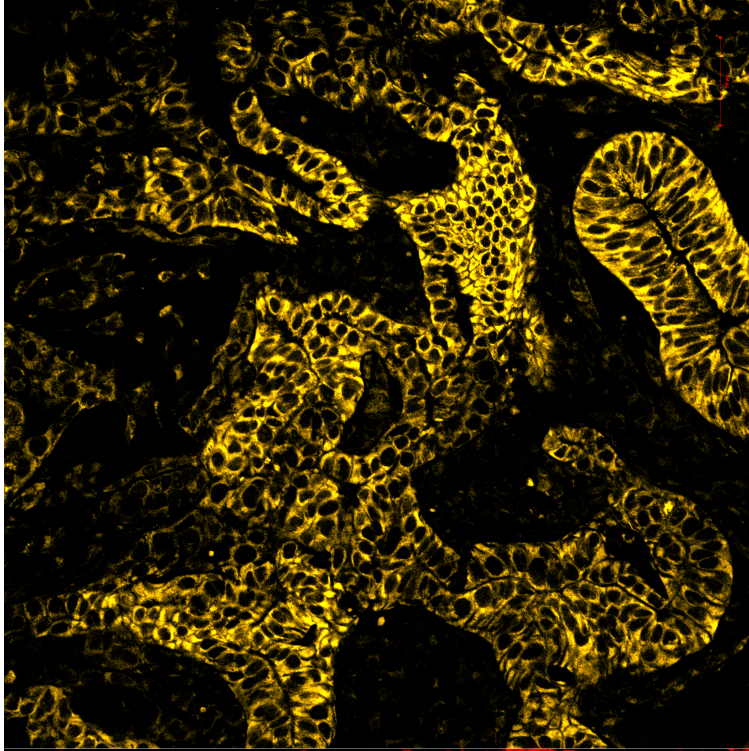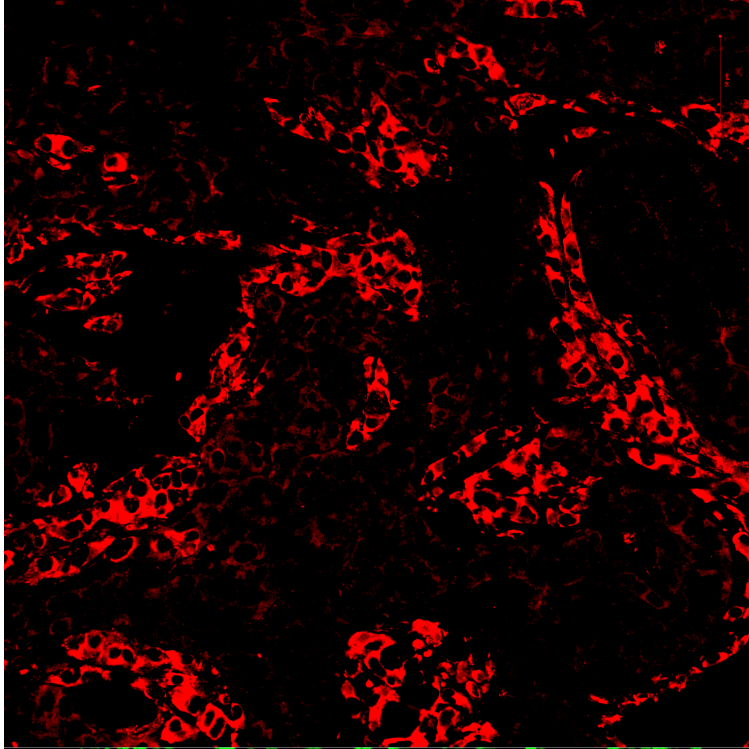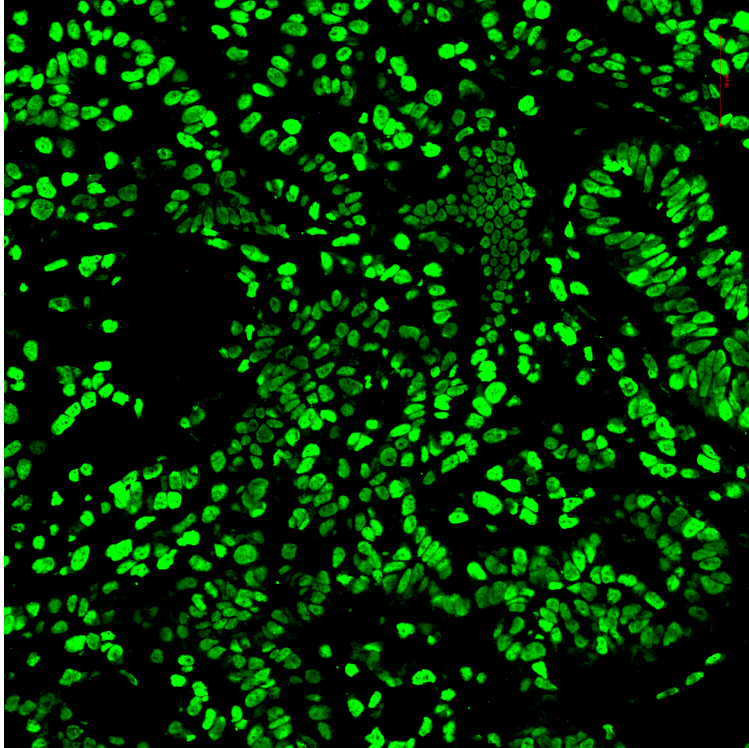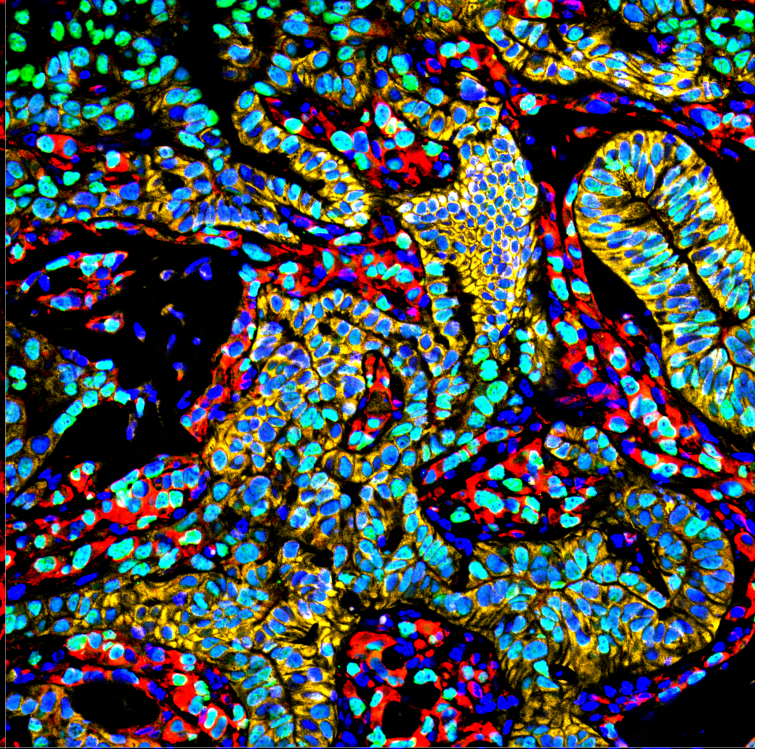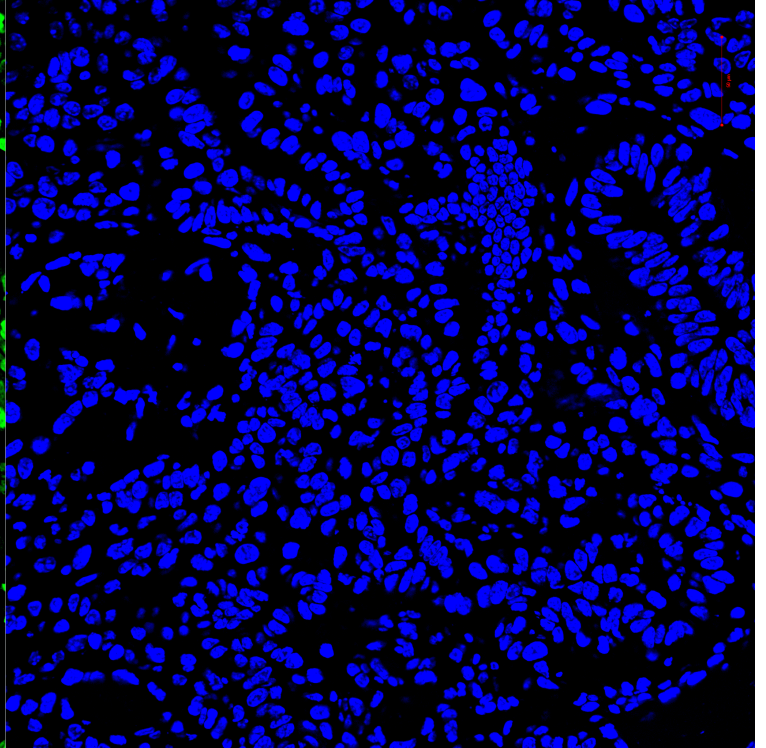

Supplement: EMBR-24-e56524-s011.pdf [file EMBR-24-e56524-s011.pdf]
